# Supplementary material for: A series of rare-earth phosphine-oxygen complexes containing [PW12O40]3− with highly efficient photocatalytic degradation of MB
Source: Royal Society of Chemistry journal article supplement (doi:10.1039/d4ce00851k), 2024-01-01
Supplement: d4ce00851k20.pdf [file d4ce00851k20.pdf]

## Supporting information

### A series of rare-earth phosphine-oxygen complexes containing [PW<sub>12</sub>O<sub>40</sub>]<sup>3-</sup> with highly efficient photocatalytic degradation of MB

Ying-Yu Li,<sup>† a</sup> Qi-Ming Qiu,<sup>† b</sup> Si-Jie Fan,<sup>a</sup> Jian-Jie Xu,<sup>a</sup> Wen-Long Mou,<sup>a</sup> Chuan-Bing Hou,<sup>a,c</sup> Min Liu,<sup>d</sup> Yu-Ping Yang,<sup>e</sup> Li-Xiong Dai,<sup>\* f</sup> Hong-Liang Han<sup>\* a</sup> and Qiong-Hua Jin<sup>\* a,g,h,i</sup>

a. Department of Chemistry, Capital Normal University, Beijing 100048, China. E-mail: jinqh@cnu.edu.cn, jinqh204@163.com

b. School of Science, China University of Geosciences, Beijing, 100083, China

c. College of Resource Environment and Tourism, Capital Normal University, Beijing 100048, China

d. Laboratory of Advanced Functional Materials, Ministry of Education, Faculty of Materials and Manufacturing, Beijing University of Technology, Beijing 100124, China.

e. School of Science, Minzu University of China, Beijing, 100081, China.

f. Wenzhou Institute, University of Chinese Academy of Sciences, Wenzhou, 325000, China.

g. State Key Laboratory of Elemento-Organic Chemistry, Nankai University, Tianjin 300071, China.

h. State Key Laboratory of Rare Earth Resource Utilization, Changchun 130022, China

i. Key Laboratory of Advanced Energy Materials Chemistry (Ministry of Education), Nankai University, Tianjin 300071, China.

<sup>†</sup>Ying-Yu Li and Qi-Ming Qiu contributed equally to this work.

Electronic Supplementary Information (ESI) available: crystal structure information, IR spectra, etc. CCDC 2247667-2247677. For ESI and crystallographic data in CIF or other electronic format See DOI: 10.1039/x0xx00000x

### Caption of Figure

**Fig. S1** Three-dimensional molecular stacking structure of complex **2**.

**Fig. S2** Three-dimensional molecular stacking structure of complex **3**.

**Fig. S3** Three-dimensional molecular stacking structure of complex **4**.

**Fig. S4** Three-dimensional molecular stacking structure of complex **5**.

**Fig. S5** Three-dimensional molecular stacking structure of complex **6**.

**Fig. S6** Three-dimensional molecular stacking structure of complex **7**.

**Fig. S7** Three-dimensional molecular stacking structure of complex **8**.

**Fig. S8** Three-dimensional molecular stacking structure of complex **9**.

**Fig. S9** Three-dimensional molecular stacking structure of complex **10**.

**Fig. S10** Three-dimensional molecular stacking structure of complex **11**.

**Fig. S11** Infrared spectra of complexes **1-11**.

**Fig. S12** Infrared spectra of complex **1**, ligand L and polyoxometalate H<sub>3</sub>PW<sub>12</sub>O<sub>40</sub>.

**Fig. S13** Thermogravimetric curves of complexes **1-11**.

**Fig. S14** Powder X-ray diffraction of complexes **1-11**.

**Fig. S15** Solid UV-Vis diffuse reflectance spectrum of K-M function vs  $E_g$  for complexes **1-11**.

**Fig. S16** UV-visible spectra (inside) and MB degradation efficiency curves (outside) for complexes **1-11**.

**Fig. S17** Linear relationship of  $\ln(C_0/C_t)$  reaction time over complexes **1-11** in degradation of MB.

**Fig. S18** Efficiency of 5 cycles photocatalytic degradation for complex **8**.

**Fig. S19** Comparison of PXRD before and after catalysis of complex **8**.

## Caption of Table

**Table S1** The reagents required for the experiment.

**Table S2** The instruments required for the experiment.

**Table S3** Crystallographic and refinement data for complexes **1-11**.

**Table S4** The major bond lengths( $\text{\AA}$ ) and bond angles( $^\circ$ ) for complexes **1-11**.

**Table S5** Weak interactions in the stacking structure of complex **1**.

**Table S6** Weak interactions in the stacking structure of complex **2**.

**Table S7** Weak interactions in the stacking structure of complex **3**.

**Table S8** Weak interactions in the stacking structure of complex **4**.

**Table S9** Weak interactions in the stacking structure of complex **5**.

**Table S10** Weak interactions in the stacking structure of complex **6**.

**Table S11** Weak interactions in the stacking structure of complex **7**.

**Table S12** Weak interactions in the stacking structure of complex **8**.

**Table S13** Weak interactions in the stacking structure of complex **9**.

**Table S14** Weak interactions in the stacking structure of complex **10**.

**Table S15** Weak interactions in the stacking structure of complex **11**.

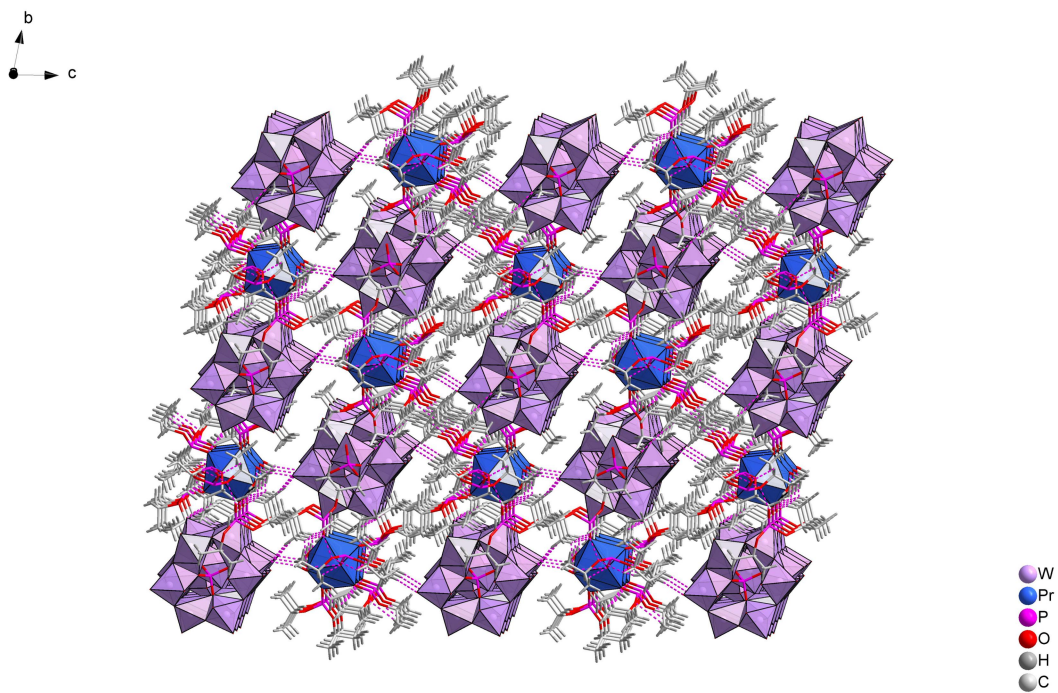

**Fig. S1** Three-dimensional molecular stacking structure of complex **2**.

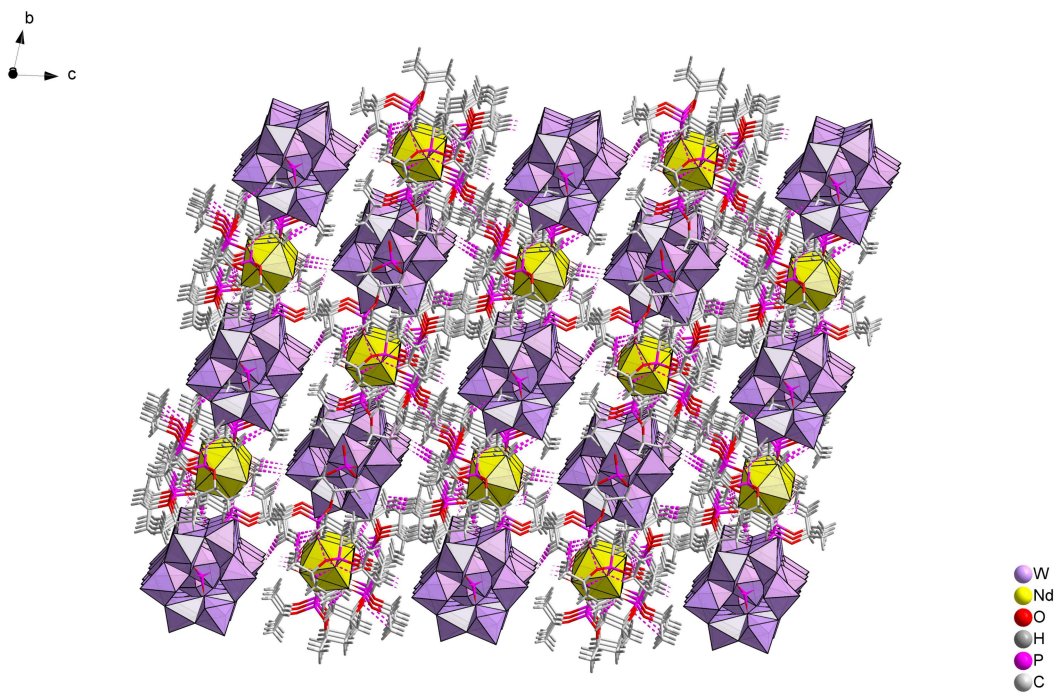

**Fig. S2** Three-dimensional molecular stacking structure of complex **3**.

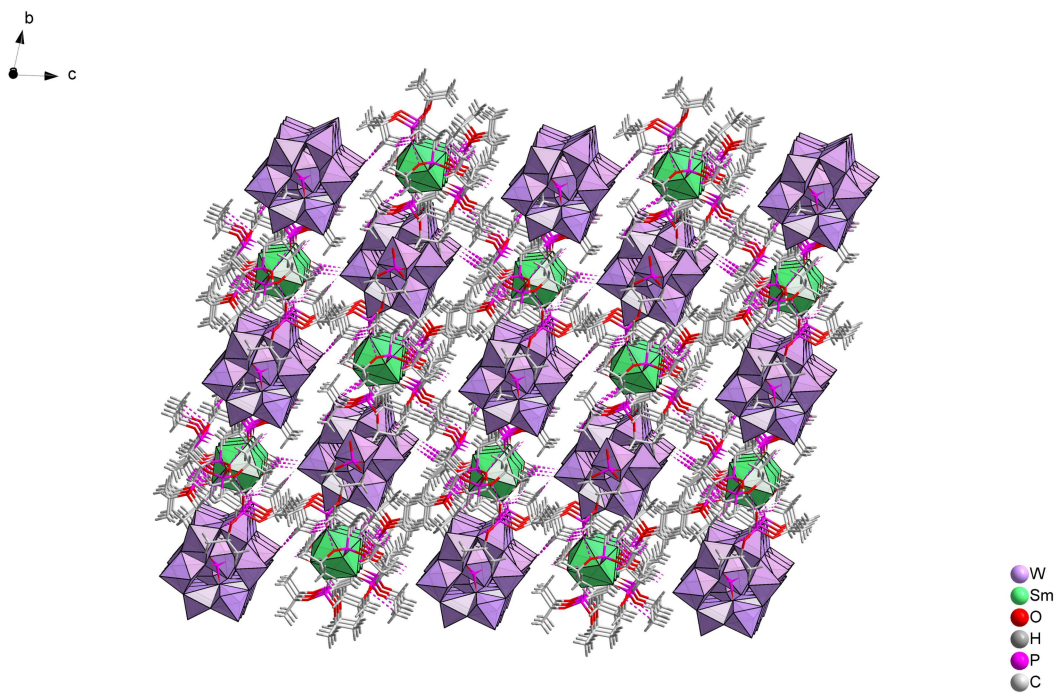

**Fig. S3** Three-dimensional molecular stacking structure of complex 4.

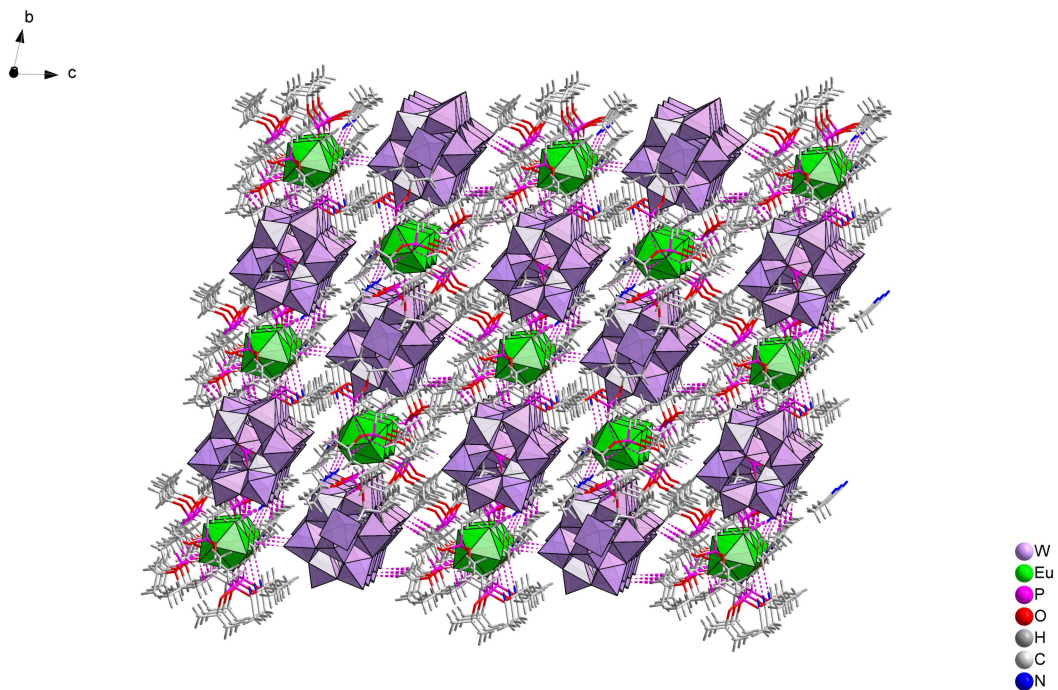

**Fig. S4** Three-dimensional molecular stacking structure of complex 5.



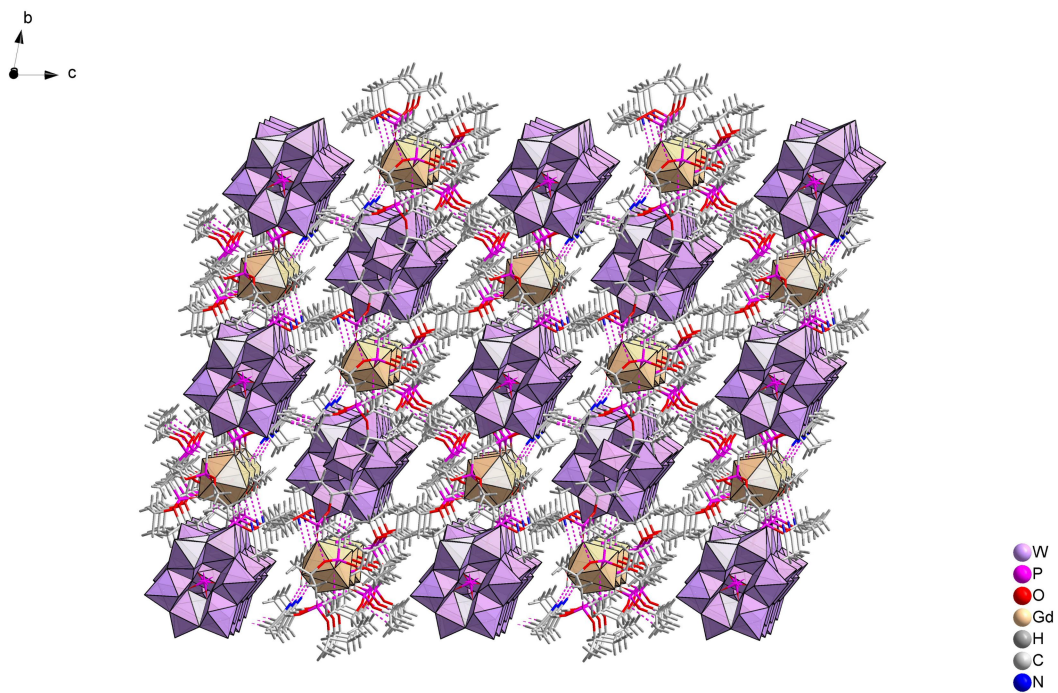

**Fig. S5** Three-dimensional molecular stacking structure of complex **6**.

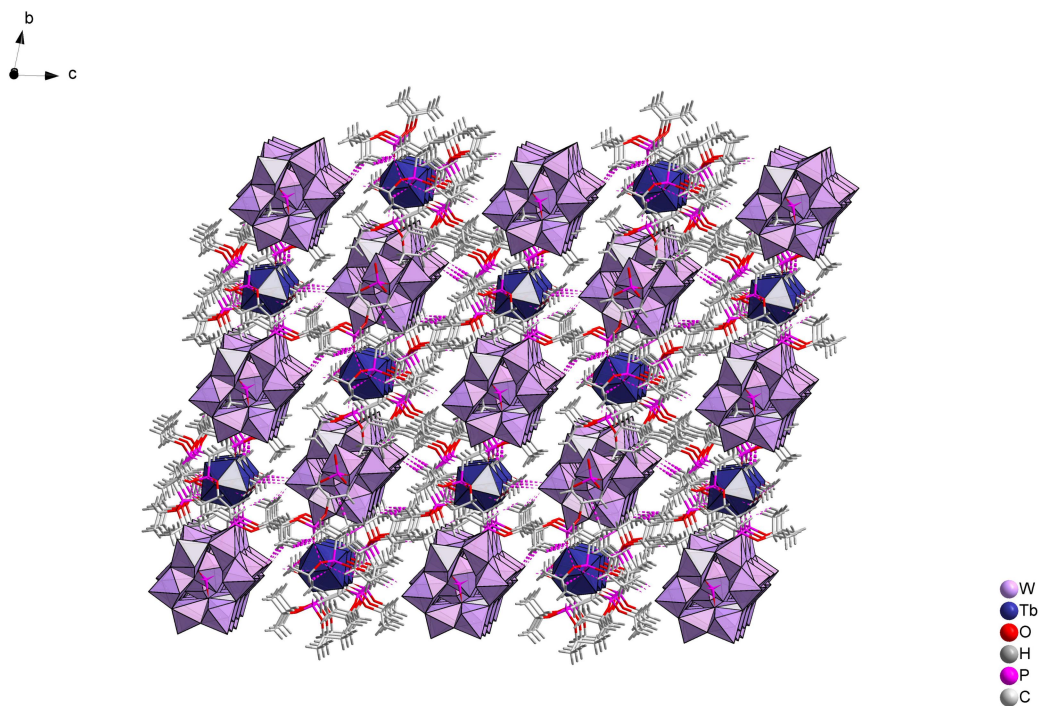

**Fig. S6** Three-dimensional molecular stacking structure of complex **7**.

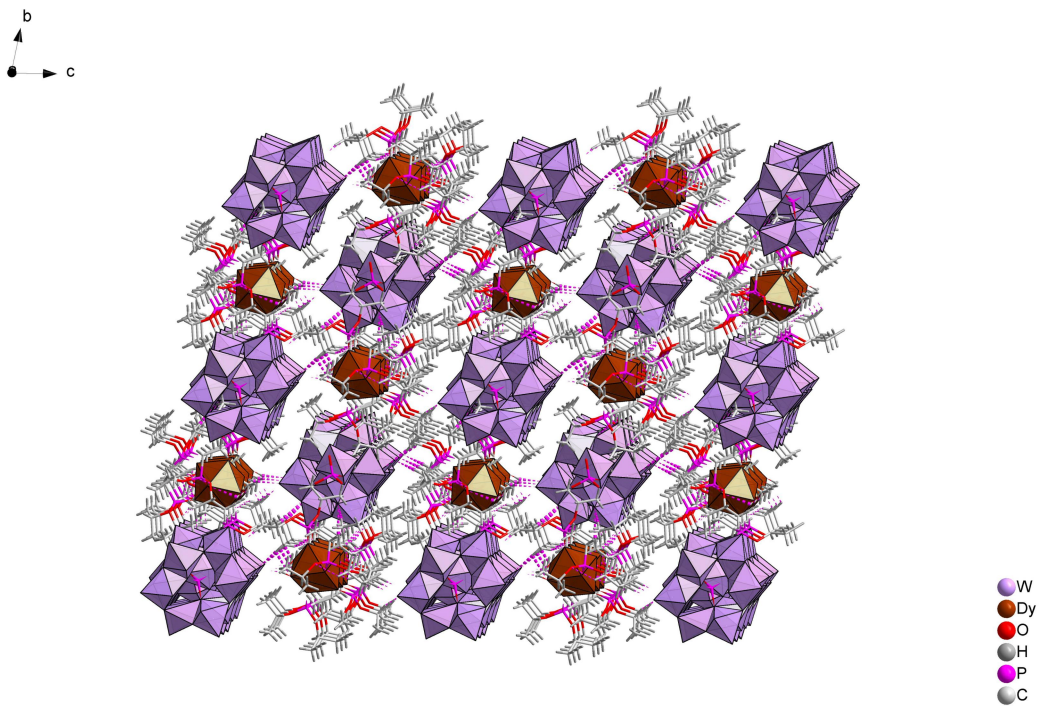

**Fig. S7** Three-dimensional molecular stacking structure of complex **8**.

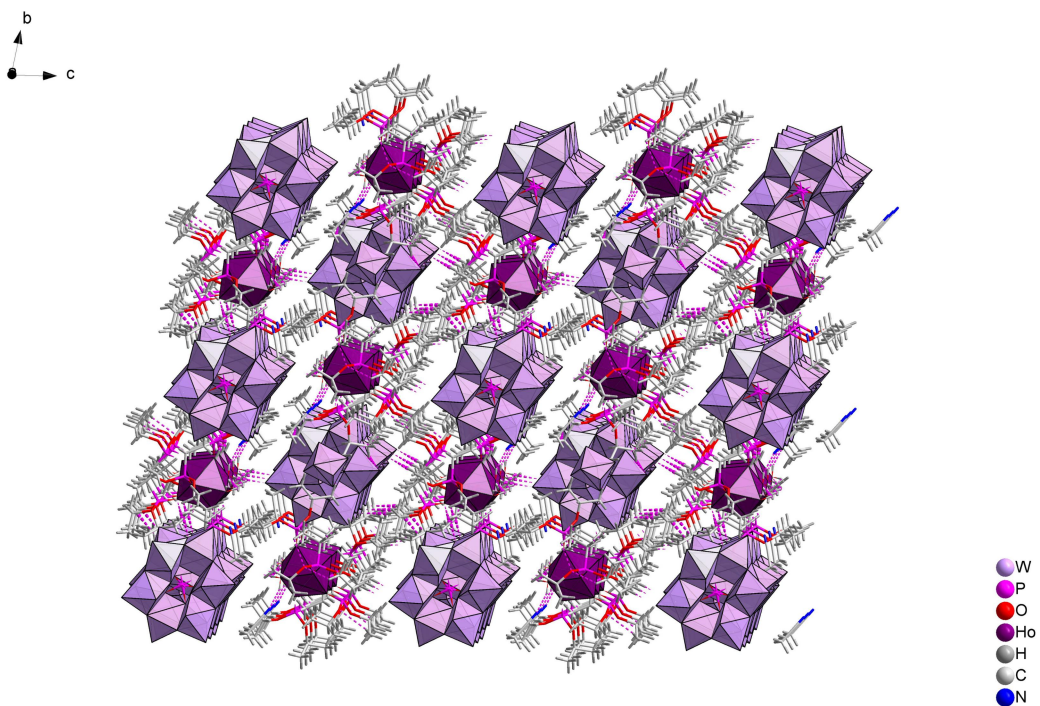

**Fig. S8** Three-dimensional molecular stacking structure of complex **9**.



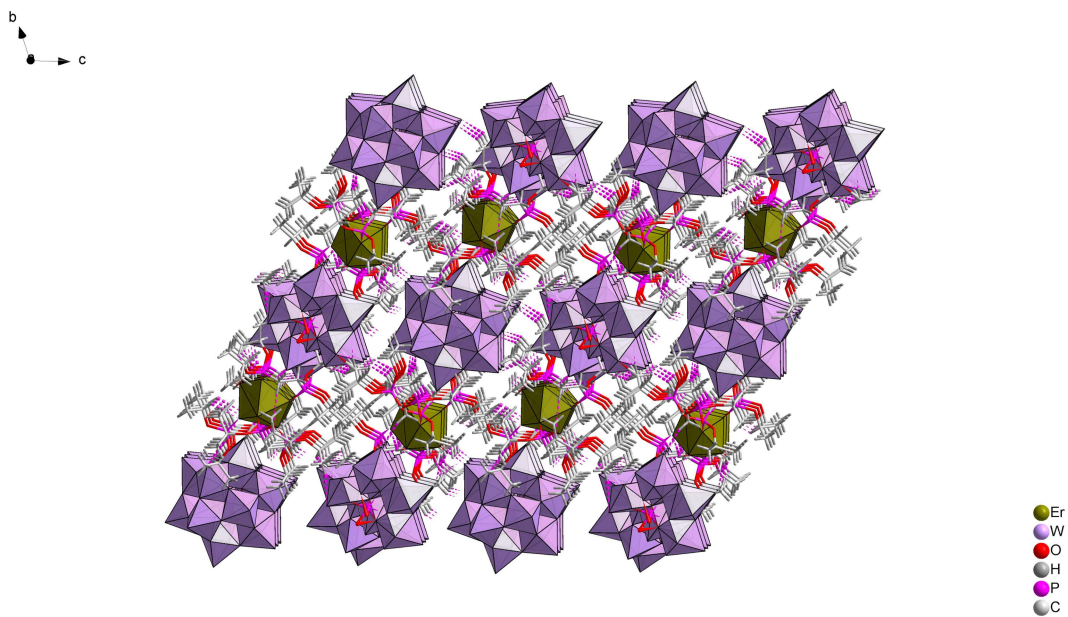

**Fig. S9** Three-dimensional molecular stacking structure of complex **10**.

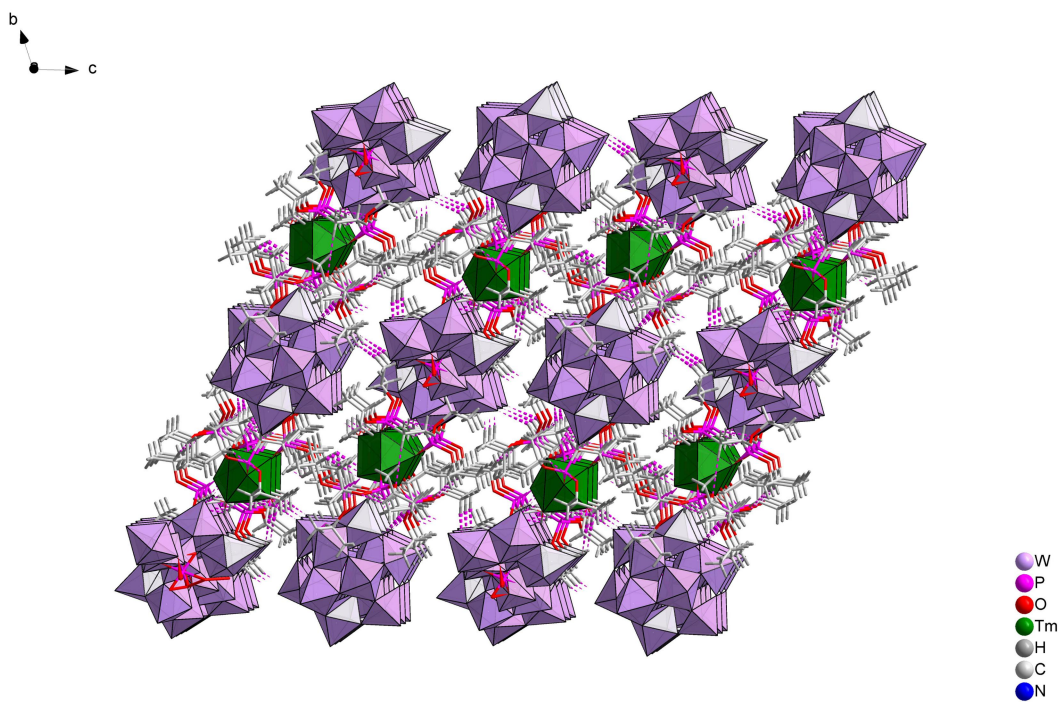

**Fig. S10** Three-dimensional molecular stacking structure of complex **11**.

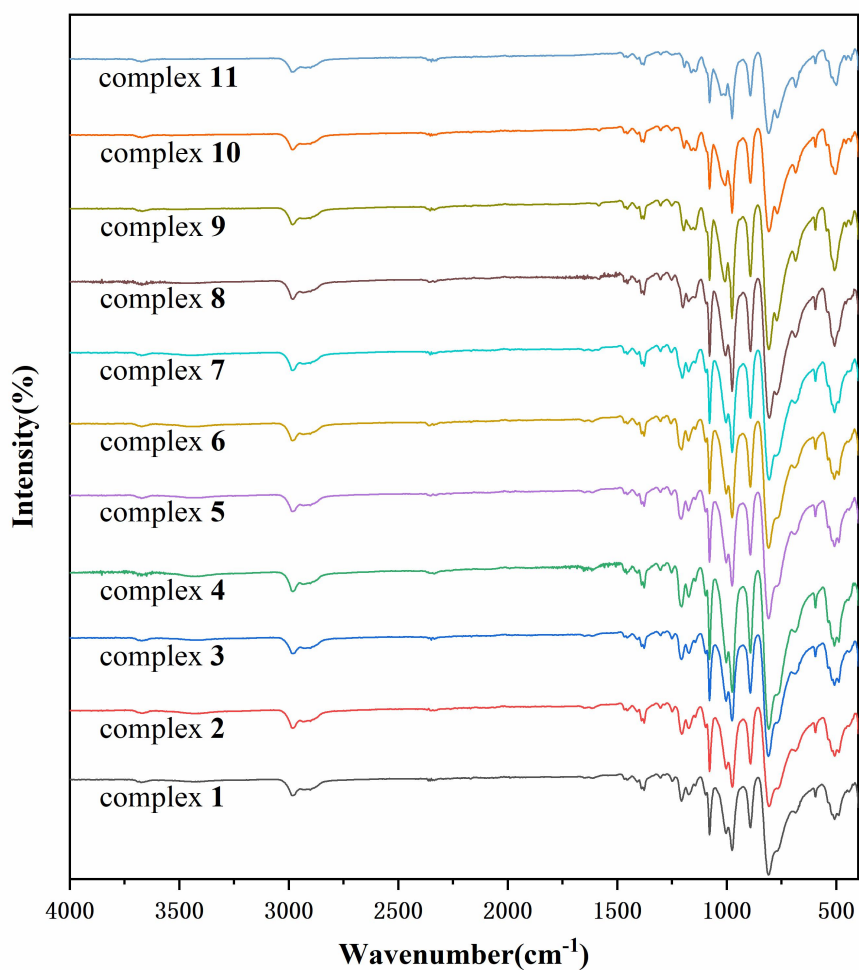

**Fig. S11** Infrared spectra of complexes **1-11**.

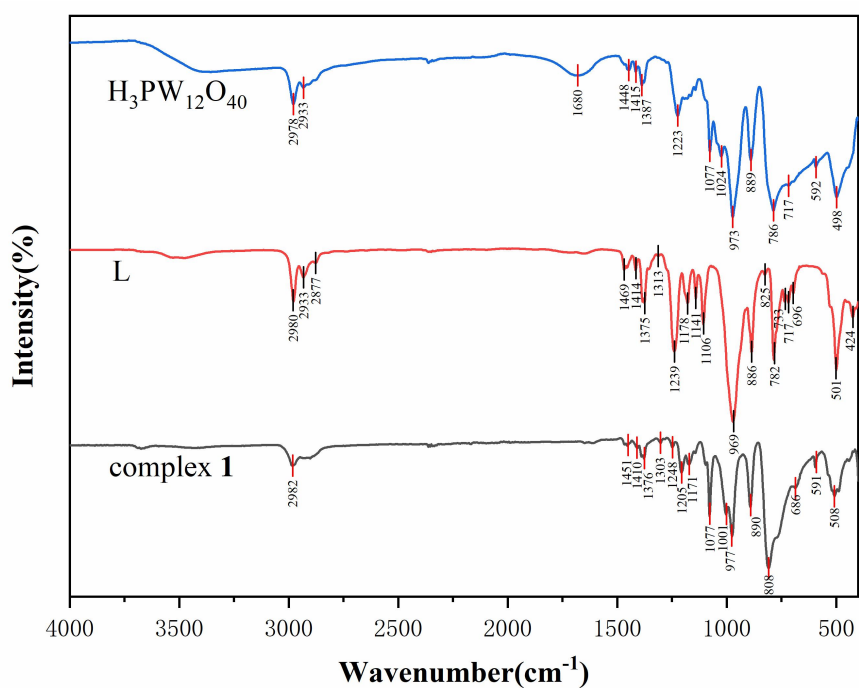

**Fig. S12** Infrared spectra of complex **1**, ligand **L** and polyoxometalate  $\text{H}_3\text{PW}_{12}\text{O}_{40}$ .



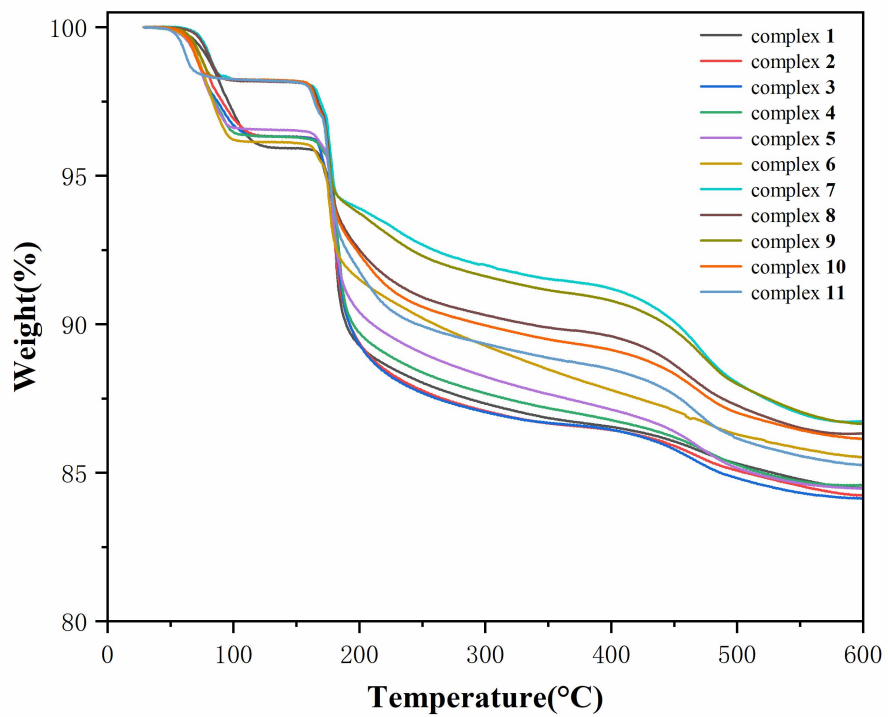

**Fig. S13** Thermogravimetric curves of complexes 1-11.

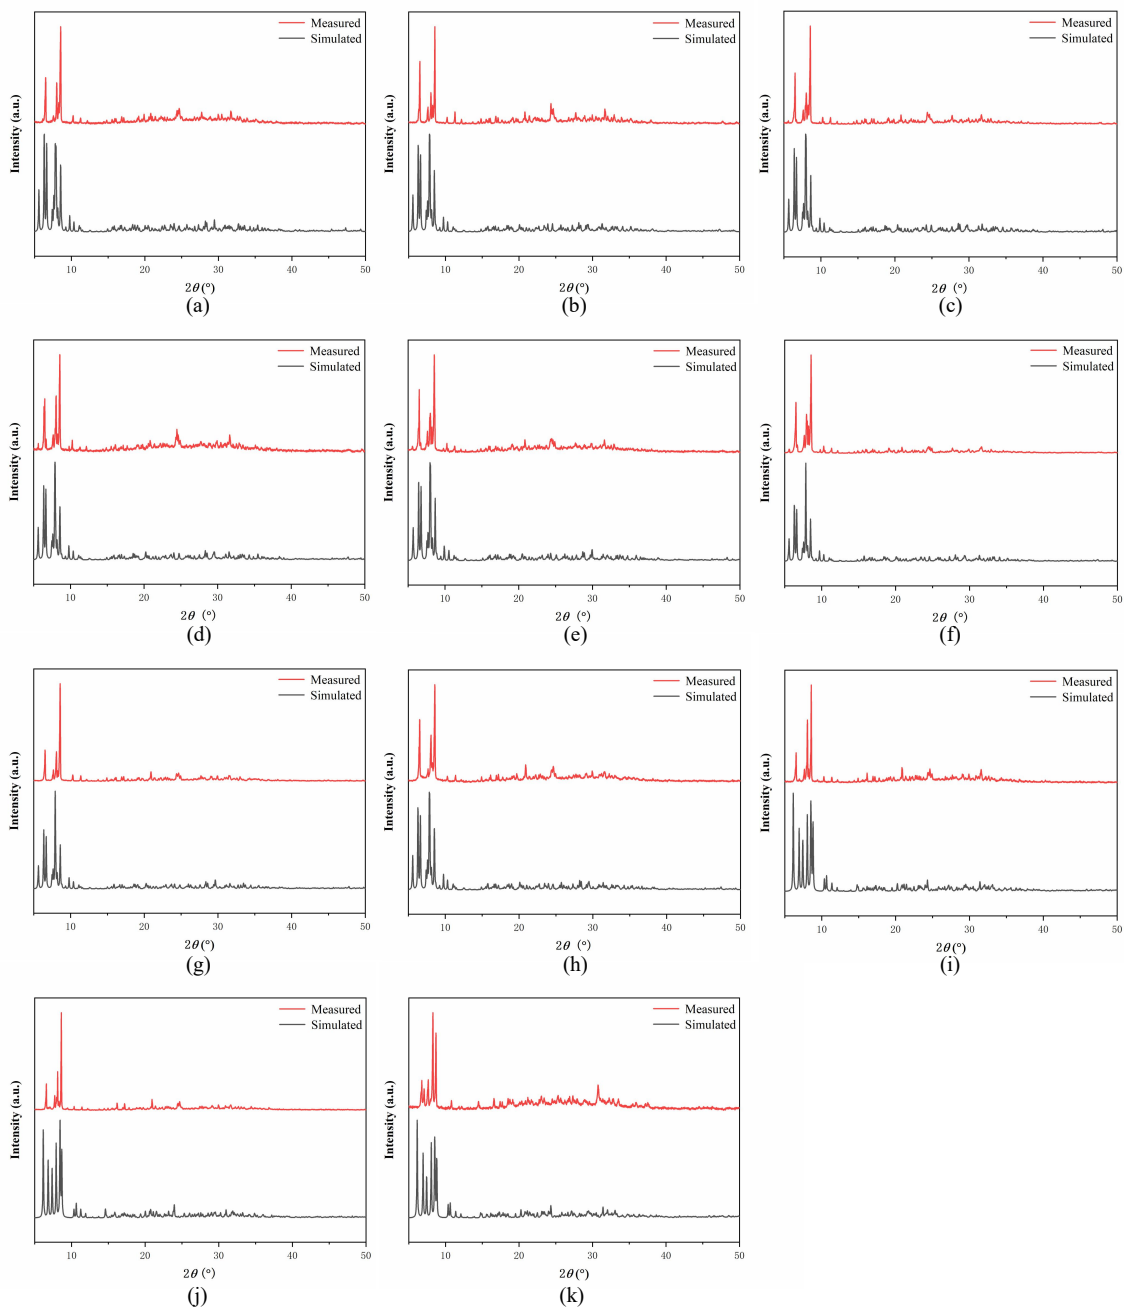

**Fig. S14** Powder X-ray diffraction of complexes **1-11**.

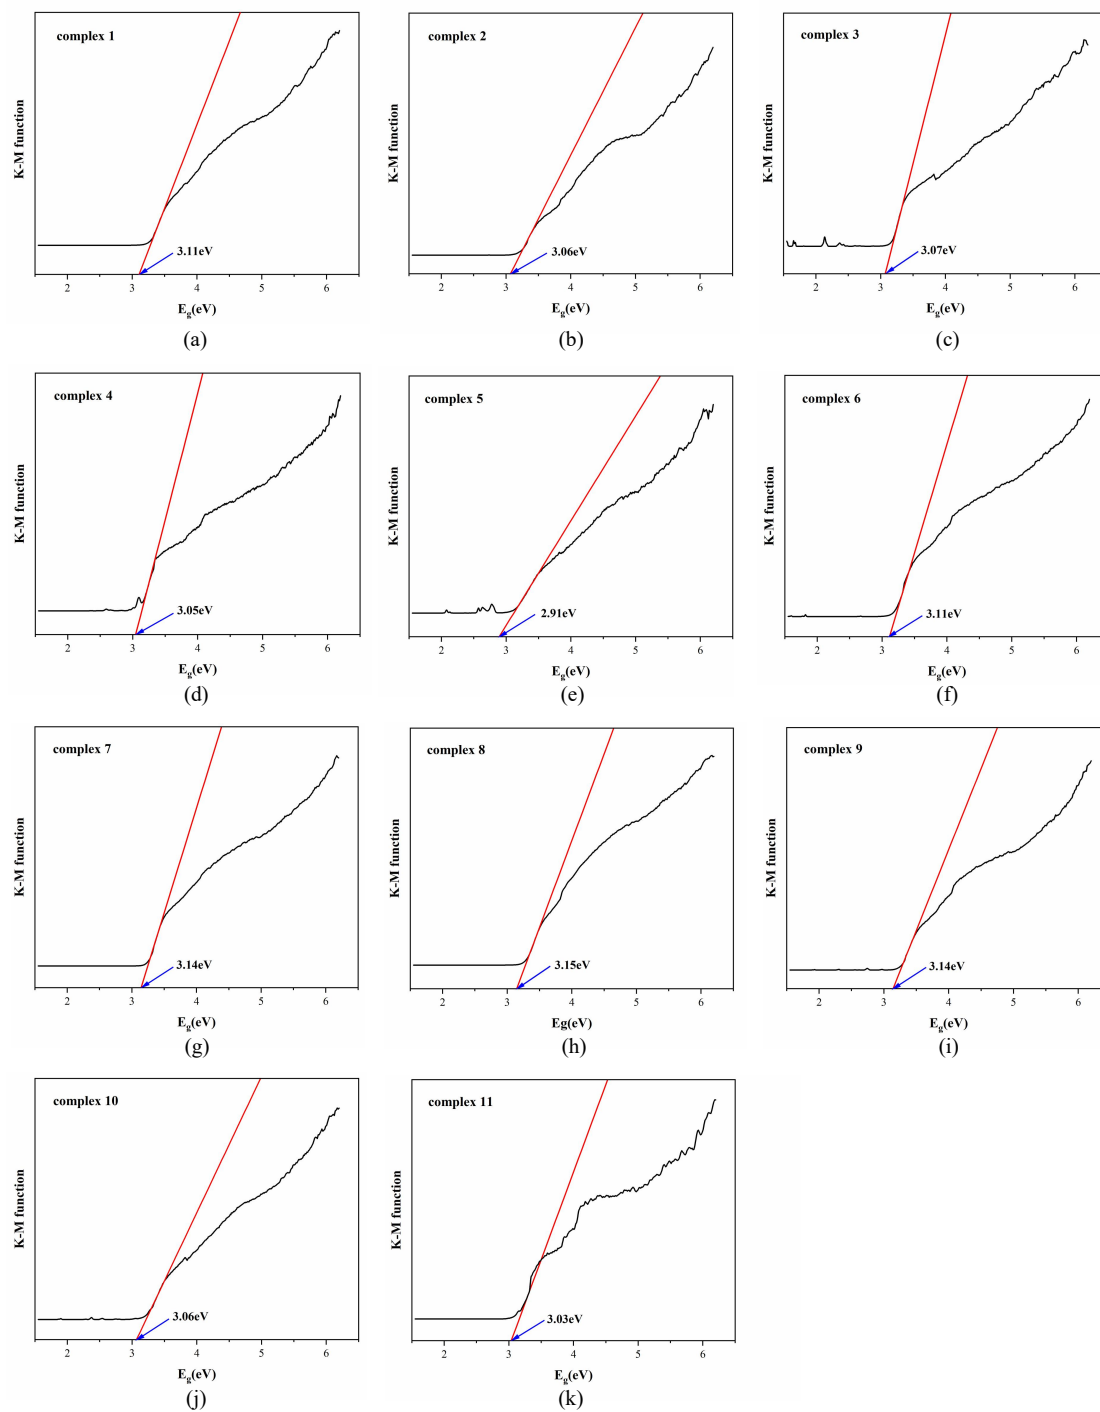

**Fig. S15** Solid UV-Vis diffuse reflectance spectrum of K-M function vs  $E_g$  for complexes **1-11**.

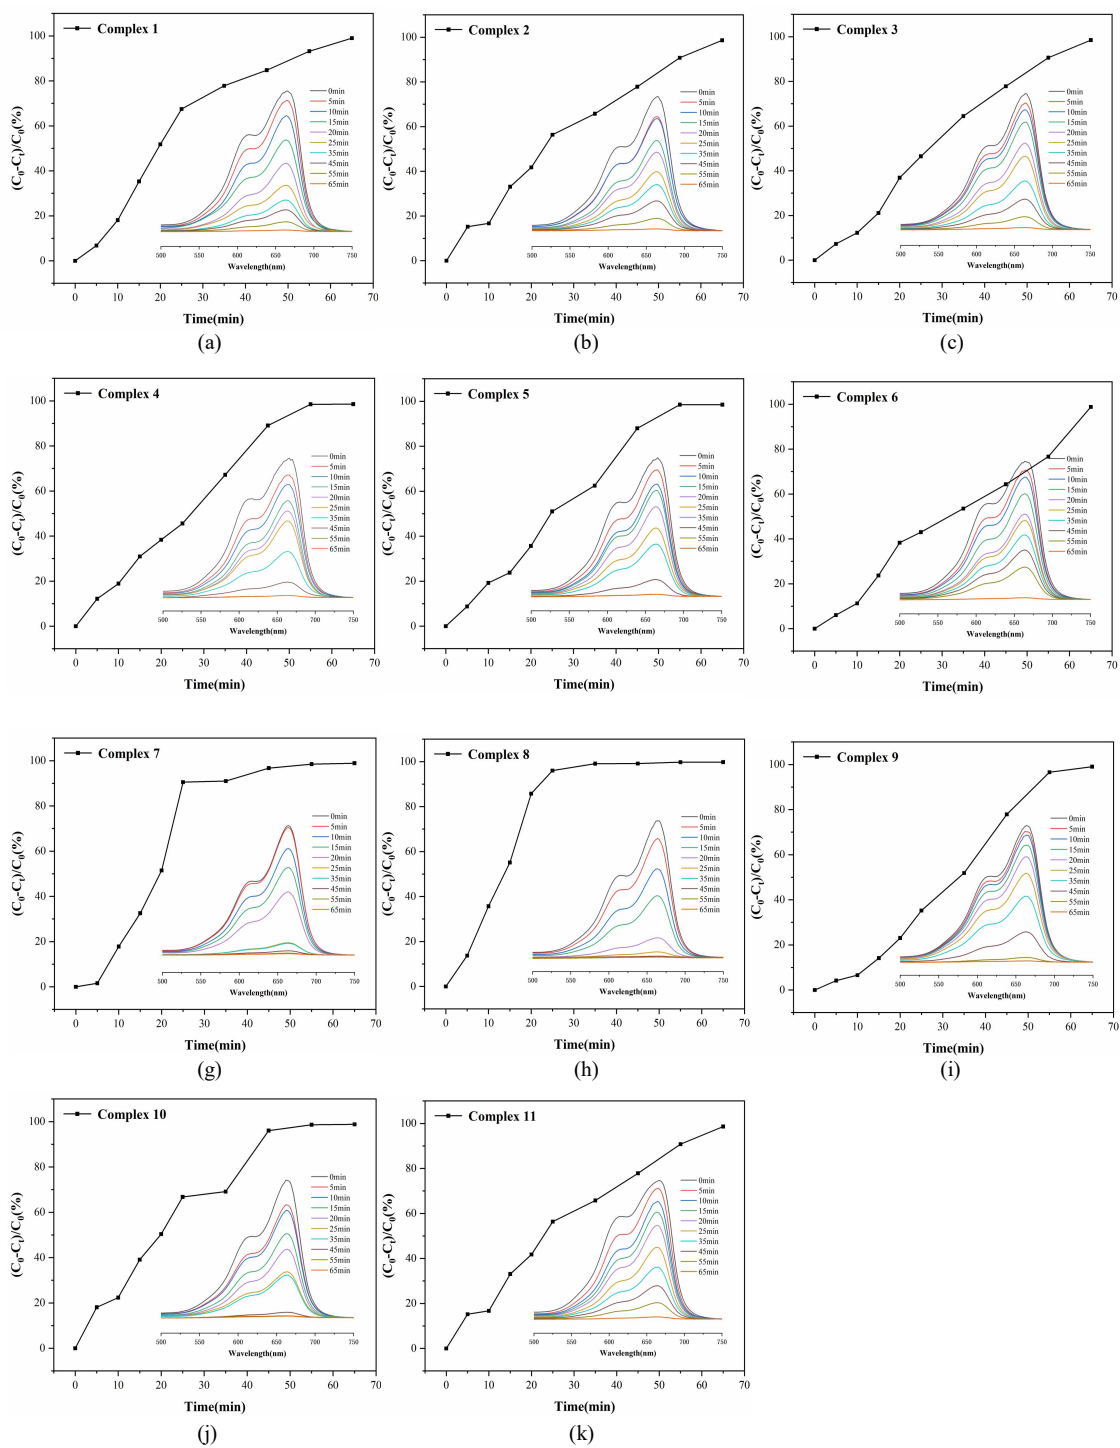

**Fig. S16** UV-visible spectra (inside) and MB degradation efficiency curves (outside) for complexes 1-11.



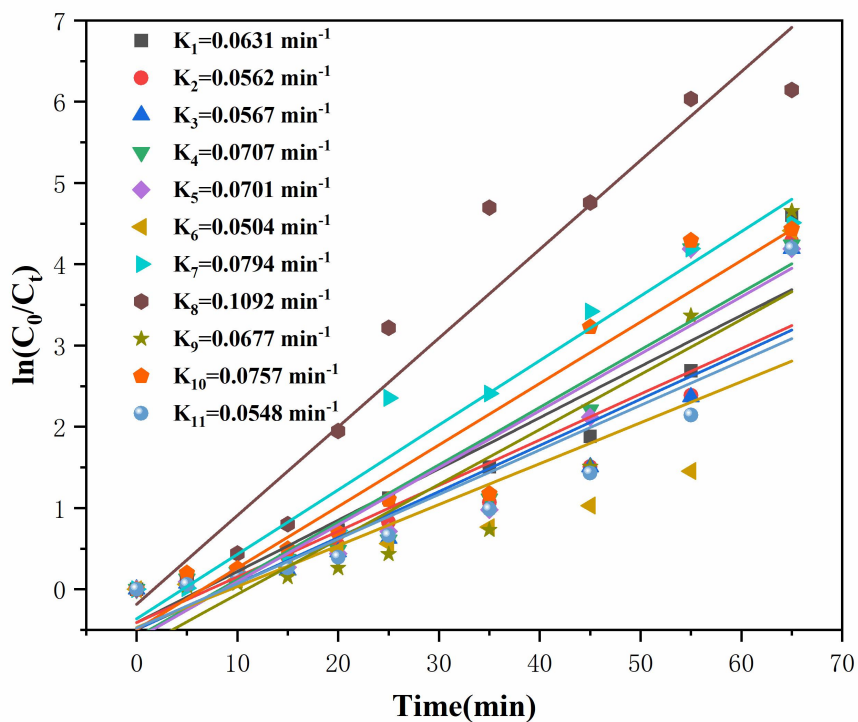

**Fig. S17** Linear relationship of  $\ln(C_0/C_t)$  reaction time over complexes **1–11** in degradation of MB.

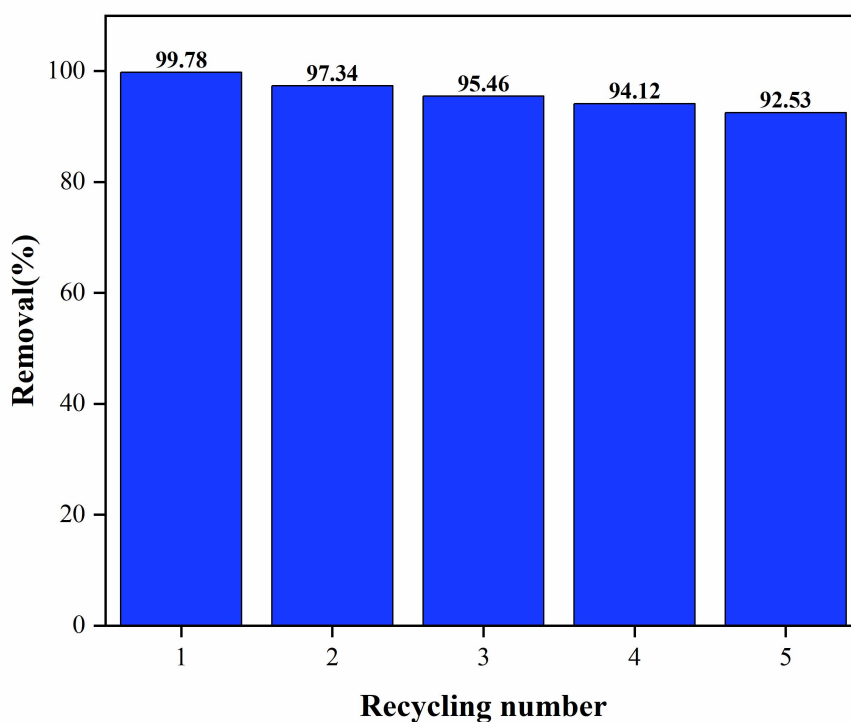

**Fig. S18** Efficiency of 5 cycles photocatalytic degradation for complex **8**.

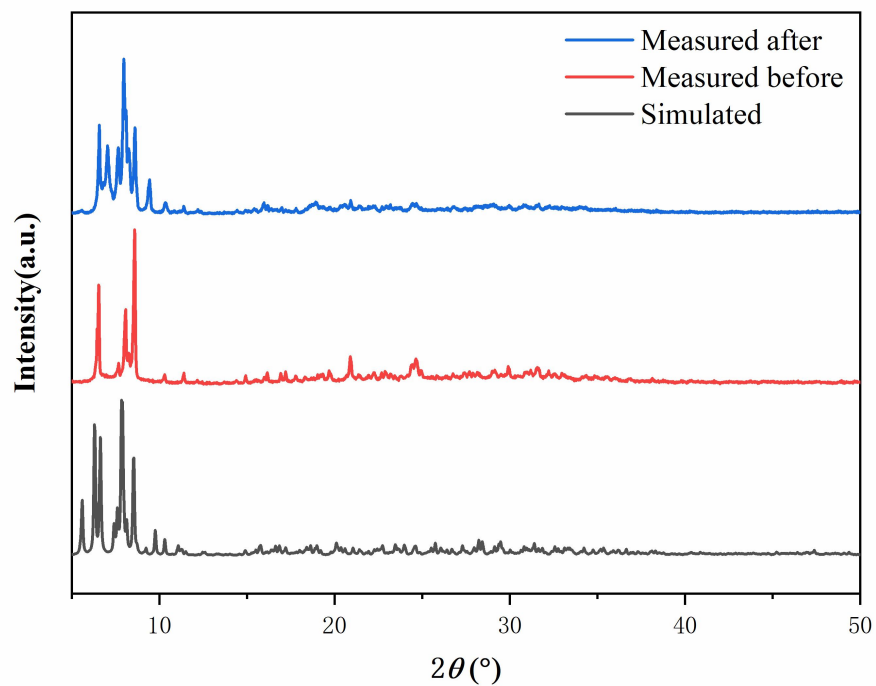

**Fig. S19** Comparison of PXRD before and after catalysis of complex **8**.

**Table S1** The reagents required for the experiment.

| Reagent Name                                                                                          | Purity | Manufacturer                                   |
|-------------------------------------------------------------------------------------------------------|--------|------------------------------------------------|
| Lanthanum chloride salt<br>( $\text{LnCl}_3 \cdot 6\text{H}_2\text{O}$ )                              | 99.99% | Changcheng Chemical Technology Development Co. |
| Tetraisopropyl ethylene diphosphonate<br>( $\text{C}_{14}\text{H}_{32}\text{O}_4\text{P}_2$ )         | 99.0%  | Alfa Aesar (China) Chemical Co.                |
| Phosphotungstic acid hydrate<br>( $\text{H}_3\text{PW}_{12}\text{O}_{40} \cdot x\text{H}_2\text{O}$ ) | AR     | Shanghai Aladdin Biochemical Technology Co.    |
| Acetonitrile<br>( $\text{CH}_3\text{CN}$ )                                                            | AR     | Shanghai Aladdin Biochemical Technology Co.    |

**Table S2** The instruments required for the experiment.

| Instrument Name                             | Model                      | Manufacturer                               |
|---------------------------------------------|----------------------------|--------------------------------------------|
| Electronic Balance                          | AR124CN                    | OHAUS Instruments (Changzhou) Co.          |
| Intelligent Magnetic Stirrer                | ZNCL-BS140                 | Shanghai Lingke Industrial Development Co. |
| X-ray single crystal diffraction instrument | D8 venture                 | Bruker, Germany                            |
| Elemental Analyser                          | Elementar Vario MICRO cube | Elementar, Germany                         |
| Fourier Infrared Spectroscopy               | Bruker Vertex 70           | Bruker Biotechnology Group Inc.            |
| Thermogravimetric Analyser                  | TG 209 F3 Tarsus           | NETZSCH, Germany                           |
| X-ray Powder Diffractometer                 | D8 advance                 | Bruker, Germany                            |
| UV-Vis Diffuse Reflection Spectrometer      | Nicolet Evolution 500      | Thermo Corporation, USA                    |
| Photocatalytic high                         | GGZ400                     | Shanghai Jiguang Special Lighting          |

|                                    |                  |                                                     |
|------------------------------------|------------------|-----------------------------------------------------|
| pressure mercury lamp              |                  | Appliance Factory                                   |
| power supply                       |                  |                                                     |
| Centrifuge                         | TG16-WS          | Hunan Xiangyi Laboratory Instrument Development Co. |
| UV-Vis Spectrometer                | UV-2550          | Shimadzu, Japan                                     |
| Terahertz Time Domain Spectroscopy | self-constructed | Minzu University of China                           |

**Table S3** Crystallographic and refinement data for complexes **1-11**.

| Complex                                                         | 1                                                                                                 | 2                                                                                  | 3                                                                                  | 4                                                                                  |
|-----------------------------------------------------------------|---------------------------------------------------------------------------------------------------|------------------------------------------------------------------------------------|------------------------------------------------------------------------------------|------------------------------------------------------------------------------------|
| Empirical formula                                               | C <sub>42</sub> H <sub>100</sub> O <sub>60</sub> P <sub>7</sub> W <sub>12</sub>                   | C <sub>42</sub> H <sub>100</sub> O <sub>60</sub> P <sub>7</sub> W <sub>12</sub>    | C <sub>42</sub> H <sub>100</sub> O <sub>60</sub> P <sub>7</sub> W <sub>12</sub>    | C <sub>42</sub> H <sub>100</sub> O <sub>60</sub> P <sub>7</sub> W <sub>12</sub>    |
| Formula weight                                                  | 4128.33                                                                                           | 4129.11                                                                            | 4132.44                                                                            | 4138.55                                                                            |
| Crystal system                                                  | Triclinic                                                                                         | Triclinic                                                                          | Triclinic                                                                          | Triclinic                                                                          |
| Space group                                                     | P-1                                                                                               | P-1                                                                                | P-1                                                                                | P-1                                                                                |
| <i>a</i> (Å)                                                    | 15.8992(14)                                                                                       | 15.9297(18)                                                                        | 15.6938(15)                                                                        | 15.8105(16)                                                                        |
| <i>b</i> (Å)                                                    | 16.2547(16)                                                                                       | 16.2805(19)                                                                        | 16.0627(14)                                                                        | 16.1724(17)                                                                        |
| <i>c</i> (Å)                                                    | 21.196(2)                                                                                         | 21.296(2)                                                                          | 20.983(2)                                                                          | 21.118(2)                                                                          |
| $\alpha$ (°)                                                    | 78.983(2)                                                                                         | 79.204(2)                                                                          | 79.328(10)                                                                         | 79.484(10)                                                                         |
| $\beta$ (°)                                                     | 83.604(3)                                                                                         | 83.313(3)                                                                          | 83.149(2)                                                                          | 83.225(2)                                                                          |
| $\gamma$ (°)                                                    | 89.648(4)                                                                                         | 89.273(4)                                                                          | 89.207(3)                                                                          | 89.199(3)                                                                          |
| <i>V</i> (Å <sup>3</sup> )                                      | 5342.7(9)                                                                                         | 5388.1(11)                                                                         | 5160.8(8)                                                                          | 5271.9(9)                                                                          |
| <i>Z</i>                                                        | 2                                                                                                 | 2                                                                                  | 2                                                                                  | 2                                                                                  |
| <i>D</i> <sub>calc</sub> (g/cm <sup>3</sup> )                   | 2.566                                                                                             | 2.545                                                                              | 2.659                                                                              | 2.607                                                                              |
| <i>F</i> (000)                                                  | 3766                                                                                              | 3768                                                                               | 3770                                                                               | 3774                                                                               |
| <i>R</i> <sub>int</sub>                                         | 0.0000                                                                                            | 0.0841                                                                             | 0.0939                                                                             | 0.1483                                                                             |
| <i>R</i> <sub>1</sub> [ <i>I</i> > 2σ( <i>I</i> )] <sup>a</sup> | 0.0879                                                                                            | 0.0800                                                                             | 0.0830                                                                             | 0.1095                                                                             |
| $\omega R_2$ [ <i>I</i> > 2σ( <i>I</i> )] <sup>b</sup>          | 0.2091                                                                                            | 0.1768                                                                             | 0.1705                                                                             | 0.2415                                                                             |
| <i>R</i> <sub>1</sub> [all data] <sup>a</sup>                   | 0.1742                                                                                            | 0.1495                                                                             | 0.1417                                                                             | 0.1814                                                                             |
| $\omega R_2$ [all data] <sup>b</sup>                            | 0.2461                                                                                            | 0.1989                                                                             | 0.1950                                                                             | 0.2724                                                                             |
| Complex                                                         | 5                                                                                                 | 6                                                                                  | 7                                                                                  | 8                                                                                  |
| Empirical formula                                               | C <sub>50</sub> H <sub>112</sub> O <sub>60</sub> N <sub>4</sub> P <sub>7</sub> W <sub>12</sub> Eu | C <sub>42</sub> H <sub>100</sub> O <sub>60</sub> P <sub>7</sub> W <sub>12</sub> Gd | C <sub>42</sub> H <sub>100</sub> O <sub>60</sub> P <sub>7</sub> W <sub>12</sub> Tb | C <sub>42</sub> H <sub>100</sub> O <sub>60</sub> P <sub>7</sub> W <sub>12</sub> Dy |
| Formula weight                                                  | 4304.38                                                                                           | 4145.45                                                                            | 4147.12                                                                            | 4150.70                                                                            |
| Crystal system                                                  | Triclinic                                                                                         | Triclinic                                                                          | Triclinic                                                                          | Triclinic                                                                          |
| Space group                                                     | P-1                                                                                               | P-1                                                                                | P-1                                                                                | P-1                                                                                |
| <i>a</i> (Å)                                                    | 15.6853(11)                                                                                       | 15.9020(16)                                                                        | 15.7502(18)                                                                        | 15.8884(16)                                                                        |
| <i>b</i> (Å)                                                    | 15.9941(12)                                                                                       | 16.2959(18)                                                                        | 16.1810(17)                                                                        | 16.2671(17)                                                                        |



|                                                                |                                                                                                      |                                                                                       |                                                                                                      |           |
|----------------------------------------------------------------|------------------------------------------------------------------------------------------------------|---------------------------------------------------------------------------------------|------------------------------------------------------------------------------------------------------|-----------|
| <i>c</i> (Å)                                                   | 20.9417(15)                                                                                          | 21.296(2)                                                                             | 21.056(3)                                                                                            | 21.247(2) |
| $\alpha$ (°)                                                   | 79.0320(10)                                                                                          | 79.254(2)                                                                             | 79.203(2)                                                                                            | 78.978(3) |
| $\beta$ (°)                                                    | 83.155(2)                                                                                            | 83.242(3)                                                                             | 83.359(3)                                                                                            | 83.287(4) |
| $\gamma$ (°)                                                   | 88.969(2)                                                                                            | 88.856(3)                                                                             | 88.955(4)                                                                                            | 89.249(4) |
| <i>V</i> (Å <sup>3</sup> )                                     | 5120.9(6)                                                                                            | 5384.1(10)                                                                            | 5235.7(10)                                                                                           | 5352.9(9) |
| <i>Z</i>                                                       | 2                                                                                                    | 2                                                                                     | 2                                                                                                    | 2         |
| <i>D</i> <sub>calc</sub> (g/cm <sup>3</sup> )                  | 2.792                                                                                                | 2.557                                                                                 | 2.631                                                                                                | 2.575     |
| <i>F</i> (000)                                                 | 3952                                                                                                 | 3778                                                                                  | 3780                                                                                                 | 3782      |
| <i>R</i> <sub>int</sub>                                        | 0.1015                                                                                               | 0.0763                                                                                | 0.1401                                                                                               | 0.3422    |
| <i>R</i> <sub>1</sub> [ <i>I</i> >2σ( <i>I</i> )] <sup>a</sup> | 0.0773                                                                                               | 0.0795                                                                                | 0.1018                                                                                               | 0.1466    |
| $\omega R_2$ [ <i>I</i> >2σ( <i>I</i> )] <sup>b</sup>          | 0.1944                                                                                               | 0.1811                                                                                | 0.2291                                                                                               | 0.3014    |
| <i>R</i> <sub>1</sub> [all data] <sup>a</sup>                  | 0.0854                                                                                               | 0.1418                                                                                | 0.1799                                                                                               | 0.2609    |
| $\omega R_2$ [all data] <sup>b</sup>                           | 0.1985                                                                                               | 0.1994                                                                                | 0.2516                                                                                               | 0.3322    |
| <b>Complex</b>                                                 | <b>9</b>                                                                                             | <b>10</b>                                                                             | <b>11</b>                                                                                            |           |
| Empirical formula                                              | C <sub>50</sub> H <sub>112</sub> O <sub>60</sub> N <sub>4</sub> P <sub>7</sub><br>W <sub>12</sub> Ho | C <sub>42</sub> H <sub>100</sub> O <sub>60</sub> P <sub>7</sub> W <sub>12</sub><br>Er | C <sub>46</sub> H <sub>106</sub> O <sub>60</sub> N <sub>2</sub> P <sub>7</sub><br>W <sub>12</sub> Tm |           |
| Formula weight                                                 | 4317.35                                                                                              | 4155.46                                                                               | 4239.24                                                                                              |           |
| Crystal system                                                 | Triclinic                                                                                            | Triclinic                                                                             | Triclinic                                                                                            |           |
| Space group                                                    | P-1                                                                                                  | P-1                                                                                   | P-1                                                                                                  |           |
| <i>a</i> (Å)                                                   | 15.6393(8)                                                                                           | 15.7600(17)                                                                           | 15.5807(3)                                                                                           |           |
| <i>b</i> (Å)                                                   | 15.9692(8)                                                                                           | 16.9001(18)                                                                           | 16.9400(3)                                                                                           |           |
| <i>c</i> (Å)                                                   | 20.8803(10)                                                                                          | 22.290(2)                                                                             | 21.7710(4)                                                                                           |           |
| $\alpha$ (°)                                                   | 79.029(2)                                                                                            | 104.230(4)                                                                            | 104.785(2)                                                                                           |           |
| $\beta$ (°)                                                    | 83.166(2)                                                                                            | 95.080(3)                                                                             | 94.446(3)                                                                                            |           |
| $\gamma$ (°)                                                   | 88.783(2)                                                                                            | 116.550(5)                                                                            | 116.285(4)                                                                                           |           |
| <i>V</i> (Å <sup>3</sup> )                                     | 5083.1(4)                                                                                            | 5011.3(10)                                                                            | 4859.7(2)                                                                                            |           |
| <i>Z</i>                                                       | 2                                                                                                    | 2                                                                                     | 2                                                                                                    |           |
| <i>D</i> <sub>calc</sub> (g/cm <sup>3</sup> )                  | 2.821                                                                                                | 2.754                                                                                 | 2.897                                                                                                |           |
| <i>F</i> (000)                                                 | 3960                                                                                                 | 3786                                                                                  | 3876                                                                                                 |           |
| <i>R</i> <sub>int</sub>                                        | 0.0896                                                                                               | 0.2524                                                                                | 0.0506                                                                                               |           |
| <i>R</i> <sub>1</sub> [ <i>I</i> >2σ( <i>I</i> )] <sup>a</sup> | 0.0790                                                                                               | 0.1304                                                                                | 0.0461                                                                                               |           |
| $\omega R_2$ [ <i>I</i> >2σ( <i>I</i> )] <sup>b</sup>          | 0.1796                                                                                               | 0.2903                                                                                | 0.0988                                                                                               |           |
| <i>R</i> <sub>1</sub> [all data] <sup>a</sup>                  | 0.0849                                                                                               | 0.2340                                                                                | 0.0572                                                                                               |           |
| $\omega R_2$ [all data] <sup>b</sup>                           | 0.1834                                                                                               | 0.3450                                                                                | 0.1024                                                                                               |           |

$$^a R = \sum (|F_o| - |F_c|) / \sum |F_o|.$$

$$^b \omega R = [\sum \omega (|F_o|^2 - |F_c|^2)^2 / \sum \omega |F_o|^2]^{1/2}.$$

**Table S4** The major bond lengths(Å) and bond angles(°) for complexes **1-11**.

| <b>1</b>    |         |             |         |             |         |
|-------------|---------|-------------|---------|-------------|---------|
| Ce(1)-O(41) | 2.48(4) | Ce(1)-O(44) | 2.51(4) | Ce(1)-O(47) | 2.45(4) |
| Ce(1)-O(50) | 2.46(3) | Ce(1)-O(53) | 2.55(4) | Ce(1)-O(56) | 2.55(4) |

|                   |           |                   |           |                   |           |
|-------------------|-----------|-------------------|-----------|-------------------|-----------|
| Ce(1)-O(59)       | 2.55(4)   | Ce(1)-O(60)       | 2.63(4)   |                   |           |
| O(41)-Ce(1)-O(44) | 78.1(13)  | O(41)-Ce(1)-O(53) | 77.1(13)  | O(41)-Ce(1)-O(56) | 73.3(13)  |
| O(41)-Ce(1)-O(59) | 117.1(13) | O(41)-Ce(1)-O(60) | 141.2(12) | O(44)-Ce(1)-O(53) | 76.8(13)  |
| O(44)-Ce(1)-O(56) | 144.9(13) | O(44)-Ce(1)-O(59) | 139.9(12) | O(44)-Ce(1)-O(60) | 120.2(13) |
| O(47)-Ce(1)-O(41) | 78.9(12)  | O(47)-Ce(1)-O(44) | 71.7(14)  | O(47)-Ce(1)-O(50) | 74.5(12)  |
| O(47)-Ce(1)-O(53) | 143.6(14) | O(47)-Ce(1)-O(56) | 120.7(13) | O(47)-Ce(1)-O(59) | 75.2(14)  |
| O(47)-Ce(1)-O(60) | 137.5(13) | O(50)-Ce(1)-O(41) | 146.4(13) | O(50)-Ce(1)-O(44) | 74.3(14)  |
| O(50)-Ce(1)-O(53) | 114.0(13) | O(50)-Ce(1)-O(56) | 138.8(14) | O(50)-Ce(1)-O(59) | 75.4(13)  |
| O(50)-Ce(1)-O(60) | 71.1(12)  | O(53)-Ce(1)-O(56) | 77.5(13)  | O(53)-Ce(1)-O(59) | 140.7(13) |
| O(53)-Ce(1)-O(60) | 75.0(13)  | O(56)-Ce(1)-O(60) | 74.7(11)  | O(59)-Ce(1)-O(56) | 73.0(13)  |
| O(59)-Ce(1)-O(60) | 72.6(13)  |                   |           |                   |           |

## 2

|                   |            |                   |            |                   |            |
|-------------------|------------|-------------------|------------|-------------------|------------|
| Pr(1)-O(41)       | 2.469(3)   | Pr(1)-O(44)       | 2.458(3)   | Pr(1)-O(47)       | 2.453(4)   |
| Pr(1)-O(50)       | 2.432(3)   | Pr(1)-O(53)       | 2.428(3)   | Pr(1)-O(56)       | 2.475(4)   |
| Pr(1)-O(59)       | 2.496(4)   | Pr(1)-O(60)       | 2.593(3)   |                   |            |
| O(41)-Pr(1)-O(56) | 70.82(9)   | O(41)-Pr(1)-O(59) | 113.46(13) | O(41)-Pr(1)-O(60) | 141.30(15) |
| O(44)-Pr(1)-O(41) | 80.29(10)  | O(44)-Pr(1)-O(56) | 142.98(14) | O(44)-Pr(1)-O(59) | 142.91(15) |
| O(44)-Pr(1)-O(60) | 119.13(13) | O(47)-Pr(1)-O(41) | 75.61(9)   | O(47)-Pr(1)-O(44) | 77.01(10)  |
| O(47)-Pr(1)-O(56) | 115.91(13) | O(47)-Pr(1)-O(59) | 73.89(9)   | O(47)-Pr(1)-O(60) | 138.29(14) |
| O(50)-Pr(1)-O(41) | 148.66(15) | O(50)-Pr(1)-O(44) | 75.55(10)  | O(50)-Pr(1)-O(47) | 79.71(10)  |
| O(50)-Pr(1)-O(56) | 138.76(14) | O(50)-Pr(1)-O(59) | 77.05(9)   | O(50)-Pr(1)-O(60) | 69.37(8)   |
| O(53)-Pr(1)-O(41) | 80.57(10)  | O(53)-Pr(1)-O(44) | 76.72(10)  | O(53)-Pr(1)-O(47) | 147.00(15) |
| O(53)-Pr(1)-O(50) | 112.31(13) | O(53)-Pr(1)-O(56) | 76.13(10)  | O(53)-Pr(1)-O(59) | 137.62(15) |
| O(53)-Pr(1)-O(60) | 73.06(9)   | O(56)-Pr(1)-O(59) | 72.08(9)   | O(56)-Pr(1)-O(60) | 75.63(9)   |
| O(59)-Pr(1)-O(60) | 72.45(9)   |                   |            |                   |            |

## 3

|                   |           |                   |           |                   |          |
|-------------------|-----------|-------------------|-----------|-------------------|----------|
| Nd(1)-O(41)       | 2.41(2)   | Nd(1)-O(44)       | 2.429(19) | Nd(1)-O(47)       | 2.41(2)  |
| Nd(1)-O(50)       | 2.36(2)   | Nd(1)-O(53)       | 2.38(2)   | Nd(1)-O(56)       | 2.41(2)  |
| Nd(1)-O(59)       | 2.515(19) | Nd(1)-O(60)       | 2.55(2)   |                   |          |
| O(41)-Nd(1)-O(44) | 79.5(7)   | O(41)-Nd(1)-O(59) | 114.1(7)  | O(41)-Nd(1)-O(60) | 140.3(7) |
| O(44)-Nd(1)-O(59) | 142.8(7)  | O(44)-Nd(1)-O(60) | 120.3(7)  | O(47)-Nd(1)-O(41) | 76.4(7)  |
| O(47)-Nd(1)-O(44) | 76.5(7)   | O(47)-Nd(1)-O(59) | 73.9(7)   | O(47)-Nd(1)-O(60) | 138.5(7) |
| O(50)-Nd(1)-O(41) | 149.4(7)  | O(50)-Nd(1)-O(44) | 76.8(7)   | O(50)-Nd(1)-O(47) | 79.4(7)  |
| O(50)-Nd(1)-O(53) | 112.4(7)  | O(50)-Nd(1)-O(56) | 137.1(6)  | O(50)-Nd(1)-O(59) | 76.2(7)  |
| O(50)-Nd(1)-O(60) | 69.7(7)   | O(53)-Nd(1)-O(41) | 80.1(7)   | O(53)-Nd(1)-O(44) | 76.6(7)  |

|                   |           |                   |           |                   |           |
|-------------------|-----------|-------------------|-----------|-------------------|-----------|
| O(53)-Nd(1)-O(47) | 146.9(7)  | O(53)-Nd(1)-O(56) | 77.0(7)   | O(53)-Nd(1)-O(59) | 137.9(7)  |
| O(53)-Nd(1)-O(60) | 72.9(7)   | O(56)-Nd(1)-O(41) | 71.6(7)   | O(56)-Nd(1)-O(44) | 143.6(7)  |
| O(56)-Nd(1)-O(47) | 116.2(7)  | O(56)-Nd(1)-O(59) | 71.4(7)   | O(56)-Nd(1)-O(60) | 74.3(7)   |
| O(59)-Nd(1)-O(60) | 72.4(7)   |                   |           |                   |           |
| <b>4</b>          |           |                   |           |                   |           |
| Sm(1)-O(41)       | 2.39(3)   | Sm(1)-O(44)       | 2.42(3)   | Sm(1)-O(47)       | 2.36(3)   |
| Sm(1)-O(50)       | 2.36(3)   | Sm(1)-O(53)       | 2.34(3)   | Sm(1)-O(56)       | 2.39(3)   |
| Sm(1)-O(59)       | 2.52(2)   | Sm(1)-O(60)       | 2.55(3)   |                   |           |
| O(41)-Sm(1)-O(44) | 79.7(9)   | O(41)-Sm(1)-O(56) | 71.9(9)   | O(41)-Sm(1)-O(59) | 115.0(9)  |
| O(41)-Sm(1)-O(60) | 141.6(9)  | O(44)-Sm(1)-O(59) | 141.9(9)  | O(44)-Sm(1)-O(60) | 118.2(10) |
| O(47)-Sm(1)-O(41) | 77.8(10)  | O(47)-Sm(1)-O(44) | 77.6(9)   | O(47)-Sm(1)-O(50) | 79.8(10)  |
| O(47)-Sm(1)-O(56) | 115.5(9)  | O(47)-Sm(1)-O(59) | 72.2(8)   | O(47)-Sm(1)-O(60) | 136.7(10) |
| O(50)-Sm(1)-O(41) | 149.7(9)  | O(50)-Sm(1)-O(44) | 75.9(9)   | O(50)-Sm(1)-O(56) | 137.0(9)  |
| O(50)-Sm(1)-O(59) | 76.3(9)   | O(50)-Sm(1)-O(60) | 67.5(9)   | O(53)-Sm(1)-O(41) | 77.3(9)   |
| O(53)-Sm(1)-O(44) | 75.3(9)   | O(53)-Sm(1)-O(47) | 145.9(9)  | O(53)-Sm(1)-O(50) | 112.8(9)  |
| O(53)-Sm(1)-O(56) | 77.8(9)   | O(53)-Sm(1)-O(59) | 140.3(8)  | O(53)-Sm(1)-O(60) | 75.5(10)  |
| O(56)-Sm(1)-O(44) | 144.4(9)  | O(56)-Sm(1)-O(59) | 71.6(9)   | O(56)-Sm(1)-O(60) | 76.2(10)  |
| O(59)-Sm(1)-O(60) | 73.1(9)   |                   |           |                   |           |
| <b>5</b>          |           |                   |           |                   |           |
| Eu(1)-O(45)       | 2.366(12) | Eu(1)-O(48)       | 2.426(12) | Eu(1)-O(51)       | 2.350(13) |
| Eu(1)-O(54)       | 2.375(12) | Eu(1)-O(57)       | 2.390(13) | Eu(1)-O(60)       | 2.393(13) |
| Eu(1)-O(63)       | 2.486(12) | Eu(1)-O(64)       | 2.447(14) |                   |           |
| O(45)-Eu(1)-O(48) | 76.2(4)   | O(45)-Eu(1)-O(54) | 137.3(4)  | O(45)-Eu(1)-O(57) | 150.2(4)  |
| O(45)-Eu(1)-O(60) | 81.0(4)   | O(45)-Eu(1)-O(63) | 69.2(4)   | O(45)-Eu(1)-O(64) | 76.1(5)   |
| O(48)-Eu(1)-O(63) | 121.5(4)  | O(48)-Eu(1)-O(64) | 141.0(5)  | O(51)-Eu(1)-O(45) | 110.7(5)  |
| O(51)-Eu(1)-O(48) | 76.2(4)   | O(51)-Eu(1)-O(54) | 77.7(4)   | O(51)-Eu(1)-O(57) | 80.2(5)   |
| O(51)-Eu(1)-O(60) | 146.7(5)  | O(51)-Eu(1)-O(63) | 74.1(5)   | O(51)-Eu(1)-O(64) | 139.9(5)  |
| O(54)-Eu(1)-O(48) | 143.8(4)  | O(54)-Eu(1)-O(57) | 71.2(4)   | O(54)-Eu(1)-O(60) | 115.5(4)  |
| O(54)-Eu(1)-O(63) | 73.8(4)   | O(54)-Eu(1)-O(64) | 72.8(5)   | O(57)-Eu(1)-O(48) | 79.9(4)   |
| O(57)-Eu(1)-O(60) | 76.3(5)   | O(57)-Eu(1)-O(63) | 140.0(5)  | O(57)-Eu(1)-O(64) | 114.2(5)  |
| O(60)-Eu(1)-O(48) | 76.7(4)   | O(60)-Eu(1)-O(63) | 137.8(4)  | O(60)-Eu(1)-O(64) | 72.4(5)   |
| O(64)-Eu(1)-O(63) | 72.0(5)   |                   |           |                   |           |
| <b>6</b>          |           |                   |           |                   |           |
| Gd(1)-O(41)       | 2.360(16) | Gd(1)-O(44)       | 2.419(15) | Gd(1)-O(47)       | 2.392(16) |

|                   |           |                   |           |                   |           |
|-------------------|-----------|-------------------|-----------|-------------------|-----------|
| Gd(1)-O(50)       | 2.389(16) | Gd(1)-O(53)       | 2.381(16) | Gd(1)-O(56)       | 2.409(15) |
| Gd(1)-O(59)       | 2.478(15) | Gd(1)-O(60)       | 2.513(15) |                   |           |
| O(41)-Gd(1)-O(44) | 80.3(5)   | O(41)-Gd(1)-O(47) | 76.4(6)   | O(41)-Gd(1)-O(50) | 149.1(5)  |
| O(41)-Gd(1)-O(53) | 80.7(6)   | O(41)-Gd(1)-O(56) | 71.4(5)   | O(41)-Gd(1)-O(59) | 114.3(6)  |
| O(41)-Gd(1)-O(60) | 141.6(5)  | O(44)-Gd(1)-O(59) | 140.6(5)  | O(44)-Gd(1)-O(60) | 119.7(5)  |
| O(47)-Gd(1)-O(44) | 77.6(5)   | O(47)-Gd(1)-O(56) | 114.9(5)  | O(47)-Gd(1)-O(59) | 71.4(6)   |
| O(47)-Gd(1)-O(60) | 136.7(6)  | O(50)-Gd(1)-O(44) | 75.2(5)   | O(50)-Gd(1)-O(47) | 80.1(6)   |
| O(50)-Gd(1)-O(56) | 137.9(5)  | O(50)-Gd(1)-O(59) | 76.0(5)   | O(50)-Gd(1)-O(60) | 68.6(5)   |
| O(53)-Gd(1)-O(44) | 75.5(5)   | O(53)-Gd(1)-O(47) | 147.1(5)  | O(53)-Gd(1)-O(50) | 110.4(6)  |
| O(53)-Gd(1)-O(56) | 78.8(5)   | O(53)-Gd(1)-O(59) | 140.6(5)  | O(53)-Gd(1)-O(60) | 74.2(5)   |
| O(56)-Gd(1)-O(44) | 144.3(5)  | O(56)-Gd(1)-O(59) | 72.9(5)   | O(56)-Gd(1)-O(60) | 75.4(5)   |
| O(59)-Gd(1)-O(60) | 72.5(6)   |                   |           |                   |           |

## 7

|                   |           |                   |          |                   |          |
|-------------------|-----------|-------------------|----------|-------------------|----------|
| Tb(1)-O(41)       | 2.37(2)   | Tb(1)-O(44)       | 2.40(2)  | Tb(1)-O(47)       | 2.33(2)  |
| Tb(1)-O(50)       | 2.36(2)   | Tb(1)-O(53)       | 2.31(2)  | Tb(1)-O(56)       | 2.36(2)  |
| Tb(1)-O(59)       | 2.406(19) | Tb(1)-O(60)       | 2.48(2)  |                   |          |
| O(41)-Tb(1)-O(44) | 81.0(8)   | O(41)-Tb(1)-O(59) | 115.0(7) | O(41)-Tb(1)-O(60) | 141.0(7) |
| O(44)-Tb(1)-O(59) | 142.4(7)  | O(44)-Tb(1)-O(60) | 119.0(8) | O(47)-Tb(1)-O(41) | 76.0(8)  |
| O(47)-Tb(1)-O(44) | 78.8(7)   | O(47)-Tb(1)-O(50) | 79.5(8)  | O(47)-Tb(1)-O(56) | 114.5(8) |
| O(47)-Tb(1)-O(59) | 73.2(8)   | O(47)-Tb(1)-O(60) | 137.3(8) | O(50)-Tb(1)-O(41) | 148.9(8) |
| O(50)-Tb(1)-O(44) | 75.6(8)   | O(50)-Tb(1)-O(56) | 137.8(7) | O(50)-Tb(1)-O(59) | 75.0(6)  |
| O(50)-Tb(1)-O(60) | 69.6(7)   | O(53)-Tb(1)-O(41) | 80.5(8)  | O(53)-Tb(1)-O(44) | 75.6(7)  |
| O(53)-Tb(1)-O(47) | 147.5(8)  | O(53)-Tb(1)-O(50) | 112.5(8) | O(53)-Tb(1)-O(56) | 77.7(7)  |
| O(53)-Tb(1)-O(59) | 138.1(8)  | O(53)-Tb(1)-O(60) | 73.7(7)  | O(56)-Tb(1)-O(41) | 71.1(7)  |
| O(56)-Tb(1)-O(44) | 144.0(7)  | O(56)-Tb(1)-O(59) | 72.2(6)  | O(56)-Tb(1)-O(60) | 75.1(7)  |
| O(59)-Tb(1)-O(60) | 70.9(8)   |                   |          |                   |          |

## 8

|                   |           |                   |           |                   |           |
|-------------------|-----------|-------------------|-----------|-------------------|-----------|
| Dy(1)-O(41)       | 2.43(4)   | Dy(1)-O(44)       | 2.32(3)   | Dy(1)-O(47)       | 2.35(4)   |
| Dy(1)-O(50)       | 2.38(3)   | Dy(1)-O(53)       | 2.28(3)   | Dy(1)-O(56)       | 2.33(3)   |
| Dy(1)-O(59)       | 2.59(3)   | Dy(1)-O(60)       | 2.56(4)   |                   |           |
| O(41)-Dy(1)-O(59) | 114.8(10) | O(41)-Dy(1)-O(60) | 140.7(11) | O(44)-Dy(1)-O(41) | 79.5(11)  |
| O(44)-Dy(1)-O(47) | 78.7(12)  | O(44)-Dy(1)-O(50) | 75.2(12)  | O(44)-Dy(1)-O(56) | 143.5(12) |
| O(44)-Dy(1)-O(59) | 143.9(10) | O(44)-Dy(1)-O(60) | 117.5(12) | O(47)-Dy(1)-O(41) | 72.0(12)  |
| O(47)-Dy(1)-O(50) | 81.7(12)  | O(47)-Dy(1)-O(59) | 75.4(12)  | O(47)-Dy(1)-O(60) | 142.8(11) |



|                   |           |                   |          |                   |           |
|-------------------|-----------|-------------------|----------|-------------------|-----------|
| O(50)-Dy(1)-O(41) | 146.5(13) | O(50)-Dy(1)-O(59) | 76.6(9)  | O(50)-Dy(1)-O(60) | 71.8(11)  |
| O(53)-Dy(1)-O(41) | 80.5(12)  | O(53)-Dy(1)-O(44) | 72.6(12) | O(53)-Dy(1)-O(47) | 143.2(12) |
| O(53)-Dy(1)-O(50) | 111.7(12) | O(53)-Dy(1)-O(56) | 80.3(11) | O(53)-Dy(1)-O(59) | 139.9(11) |
| O(53)-Dy(1)-O(60) | 72.7(12)  | O(56)-Dy(1)-O(41) | 72.1(12) | O(56)-Dy(1)-O(47) | 112.5(11) |
| O(56)-Dy(1)-O(50) | 139.1(12) | O(56)-Dy(1)-O(59) | 71.0(9)  | O(56)-Dy(1)-O(60) | 75.4(11)  |
| O(60)-Dy(1)-O(59) | 73.4(12)  |                   |          |                   |           |

### 9

|                   |            |                   |          |                   |          |
|-------------------|------------|-------------------|----------|-------------------|----------|
| Ho(1)-O(41)       | 2.311(5)   | Ho(1)-O(44)       | 2.326(6) | Ho(1)-O(47)       | 2.377(6) |
| Ho(1)-O(50)       | 2.321(6)   | Ho(1)-O(53)       | 2.302(6) | Ho(1)-O(56)       | 2.341(6) |
| Ho(1)-O(59)       | 2.432(6)   | Ho(1)-O(60)       | 2.408(7) |                   |          |
| O(41)-Ho(1)-O(44) | 81.2(2)    | O(41)-Ho(1)-O(47) | 76.0(2)  | O(41)-Ho(1)-O(50) | 150.7(2) |
| O(41)-Ho(1)-O(56) | 136.93(19) | O(41)-Ho(1)-O(59) | 69.0(2)  | O(41)-Ho(1)-O(60) | 75.5(2)  |
| O(44)-Ho(1)-O(47) | 76.0(2)    | O(44)-Ho(1)-O(56) | 116.1(2) | O(44)-Ho(1)-O(59) | 138.3(2) |
| O(44)-Ho(1)-O(60) | 72.4(2)    | O(47)-Ho(1)-O(59) | 121.3(2) | O(47)-Ho(1)-O(60) | 140.0(2) |
| O(50)-Ho(1)-O(44) | 76.5(2)    | O(50)-Ho(1)-O(47) | 80.3(2)  | O(50)-Ho(1)-O(56) | 71.1(2)  |
| O(50)-Ho(1)-O(59) | 139.6(2)   | O(50)-Ho(1)-O(60) | 114.5(2) | O(53)-Ho(1)-O(41) | 110.0(2) |
| O(53)-Ho(1)-O(44) | 146.0(2)   | O(53)-Ho(1)-O(47) | 76.0(2)  | O(53)-Ho(1)-O(50) | 80.2(2)  |
| O(53)-Ho(1)-O(56) | 78.2(2)    | O(53)-Ho(1)-O(59) | 73.9(2)  | O(53)-Ho(1)-O(60) | 140.8(2) |
| O(56)-Ho(1)-O(47) | 144.1(2)   | O(56)-Ho(1)-O(59) | 73.5(2)  | O(56)-Ho(1)-O(60) | 73.6(2)  |
| O(60)-Ho(1)-O(59) | 72.4(2)    |                   |          |                   |          |

### 10

|                   |           |                   |           |                   |           |
|-------------------|-----------|-------------------|-----------|-------------------|-----------|
| Er(1)-O(41)       | 2.27(3)   | Er(1)-O(44)       | 2.35(3)   | Er(1)-O(47)       | 2.36(3)   |
| Er(1)-O(50)       | 2.36(3)   | Er(1)-O(53)       | 2.44(2)   | Er(1)-O(56)       | 2.35(3)   |
| Er(1)-O(59)       | 2.45(3)   | Er(1)-O(60)       | 2.18(3)   |                   |           |
| O(41)-Er(1)-O(44) | 77.3(10)  | O(41)-Er(1)-O(47) | 85.5(11)  | O(41)-Er(1)-O(59) | 73.2(10)  |
| O(41)-Er(1)-O(50) | 72.3(11)  | O(41)-Er(1)-O(53) | 143.6(9)  | O(41)-Er(1)-O(56) | 118.1(11) |
| O(44)-Er(1)-O(47) | 77.6(10)  | O(44)-Er(1)-O(50) | 144.7(10) | O(44)-Er(1)-O(53) | 122.2(9)  |
| O(44)-Er(1)-O(56) | 132.5(10) | O(44)-Er(1)-O(59) | 72.3(9)   | O(47)-Er(1)-O(50) | 82.3(10)  |
| O(47)-Er(1)-O(53) | 71.4(9)   | O(47)-Er(1)-O(59) | 146.1(10) | O(50)-Er(1)-O(53) | 76.9(9)   |
| O(50)-Er(1)-O(59) | 114.3(10) | O(53)-Er(1)-O(59) | 139.1(8)  | O(56)-Er(1)-O(47) | 143.0(11) |
| O(56)-Er(1)-O(50) | 79.0(10)  | O(56)-Er(1)-O(53) | 73.4(9)   | O(56)-Er(1)-O(59) | 70.9(10)  |
| O(60)-Er(1)-O(41) | 134.7(10) | O(60)-Er(1)-O(44) | 65.1(10)  | O(60)-Er(1)-O(47) | 109.0(12) |
| O(60)-Er(1)-O(50) | 150.0(10) | O(60)-Er(1)-O(53) | 80.5(9)   | O(60)-Er(1)-O(56) | 75.7(11)  |
| O(60)-Er(1)-O(59) | 71.9(11)  |                   |           |                   |           |

|                   |            |                   |            |                   |            |
|-------------------|------------|-------------------|------------|-------------------|------------|
| Tm(1)-O(41)       | 2.300(6)   | Tm(1)-O(44)       | 2.300(5)   | Tm(1)-O(47)       | 2.290(5)   |
| Tm(1)-O(50)       | 2.287(6)   | Tm(1)-O(53)       | 2.272(6)   | Tm(1)-O(56)       | 2.390(5)   |
| Tm(1)-O(59)       | 2.359(5)   | Tm(1)-O(60)       | 2.392(6)   |                   |            |
| O(41)-Tm(1)-O(44) | 77.75(19)  | O(41)-Tm(1)-O(56) | 122.9(2)   | O(41)-Tm(1)-O(59) | 69.20(19)  |
| O(41)-Tm(1)-O(60) | 71.6(2)    | O(44)-Tm(1)-O(56) | 141.22(16) | O(44)-Tm(1)-O(59) | 142.74(19) |
| O(44)-Tm(1)-O(60) | 73.58(18)  | O(47)-Tm(1)-O(41) | 146.60(18) | O(47)-Tm(1)-O(44) | 74.22(18)  |
| O(47)-Tm(1)-O(56) | 73.08(17)  | O(47)-Tm(1)-O(59) | 142.31(19) | O(47)-Tm(1)-O(60) | 116.2(2)   |
| O(50)-Tm(1)-O(41) | 75.1(2)    | O(50)-Tm(1)-O(44) | 78.9(2)    | O(50)-Tm(1)-O(47) | 82.0(2)    |
| O(50)-Tm(1)-O(56) | 76.5(2)    | O(50)-Tm(1)-O(59) | 107.7(2)   | O(50)-Tm(1)-O(60) | 140.3(2)   |
| O(53)-Tm(1)-O(41) | 133.15(18) | O(53)-Tm(1)-O(44) | 114.8(2)   | O(53)-Tm(1)-O(47) | 76.25(18)  |
| O(53)-Tm(1)-O(50) | 149.3(2)   | O(53)-Tm(1)-O(56) | 76.6(2)    | O(53)-Tm(1)-O(59) | 78.6(2)    |
| O(53)-Tm(1)-O(60) | 69.9(2)    | O(56)-Tm(1)-O(60) | 140.89(18) | O(59)-Tm(1)-O(56) | 74.08(18)  |
| O(59)-Tm(1)-O(60) | 79.9(2)    |                   |            |                   |            |

**Table S5** Weak interactions in the stacking structure of complex **1**.

| Intermolecular hydrogen bonding within complex <b>1</b> |         |         |         |
|---------------------------------------------------------|---------|---------|---------|
| Donor-H...Acceptor                                      | D-H (Å) | H-A (Å) | D-A (Å) |
| C(2)-H(2A)...O(15)                                      | 0.97    | 2.43    | 3.30(2) |
| C(3)-H(3B)...O(14)                                      | 0.97    | 2.57    | 3.38(3) |
| C(11)-H(11A)...O(13)                                    | 0.97    | 2.39    | 3.21(2) |
| C(17)-H(17A)...O(5)                                     | 0.97    | 2.48    | 3.41(3) |
| C(18)-H(18B)...O(21)                                    | 0.96    | 2.35    | 3.27(2) |
| C(22)-H(22A)...O(37)                                    | 0.97    | 2.54    | 3.43(3) |
| C(23)-H(23B)...O(30)                                    | 0.97    | 2.46    | 3.31(3) |
| C(23)-H(23B)...O(44)                                    | 0.97    | 2.56    | 3.32(3) |
| C(31)-H(31A)...O(39)                                    | 0.97    | 2.58    | 3.47(3) |
| C(32)-H(32A)...O(44)                                    | 0.97    | 2.27    | 3.23(3) |
| C(35)-H(35A)...O(29)                                    | 0.97    | 2.57    | 3.26(3) |
| C(36)-H(36B)...O(34)                                    | 0.96    | 2.58    | 3.45(3) |
| C(42)-H(42A)...O(22)                                    | 0.96    | 2.57    | 3.49(3) |
| Intramolecular hydrogen bonding within complex <b>1</b> |         |         |         |
| Donor-H...Acceptor                                      | D-H (Å) | H-A (Å) | D-A (Å) |
| C(3)-H(3A)...O(54)                                      | 0.97    | 2.49    | 2.90(3) |
| C(13)-H(13A)...O(58)                                    | 0.97    | 2.58    | 3.00(2) |

|                    |      |      |         |
|--------------------|------|------|---------|
| C(15)-H(15B)⋯O(47) | 0.97 | 2.44 | 2.78(3) |
| C(25)-H(25A)⋯O(49) | 0.97 | 2.36 | 2.88(3) |
| C(33)-H(33A)⋯O(66) | 0.97 | 2.54 | 2.97(3) |
| C(37)-H(37A)⋯O(52) | 0.96 | 2.39 | 2.84(3) |

**Table S6** Weak interactions in the stacking structure of complex **2**.

| Intermolecular hydrogen bonding within complex <b>2</b> |         |         |         |
|---------------------------------------------------------|---------|---------|---------|
| Donor-H⋯Acceptor                                        | D-H (Å) | H-A (Å) | D-A (Å) |
| O(59)-H(59A)⋯O(30)                                      | 0.87    | 2.23    | 2.9497  |
| C(4)-H(4A)⋯O(24)                                        | 0.96    | 2.59    | 3.5406  |
| C(24)-H(24B)⋯O(30)                                      | 0.96    | 1.95    | 2.9016  |
| C(27)-H(27A)⋯O(40)                                      | 0.96    | 2.52    | 3.4248  |
| C(35)-H(35B)⋯O(35)                                      | 0.96    | 1.79    | 2.4083  |
| Intramolecular hydrogen bonding within complex <b>2</b> |         |         |         |
| Donor-H⋯Acceptor                                        | D-H (Å) | H-A (Å) | D-A (Å) |
| O(59)-H(59B)⋯O(47)                                      | 0.87    | 2.50    | 2.9748  |
| C(5)-H(5B)⋯O(41)                                        | 0.96    | 2.59    | 3.1837  |
| C(7)-H(7C)⋯O(42)                                        | 0.96    | 2.59    | 3.2624  |
| C(17)-H(17)⋯O(49)                                       | 0.98    | 2.51    | 2.9265  |
| C(24)-H(24C)⋯O(50)                                      | 0.96    | 1.89    | 2.8014  |
| C(24)-H(24C)⋯O(59)                                      | 0.96    | 2.54    | 3.0421  |
| C(33)-H(33B)⋯O(55)                                      | 0.96    | 2.56    | 3.3431  |
| C(35)-H(35C)⋯O(54)                                      | 0.96    | 2.14    | 2.6917  |

**Table S7** Weak interactions in the stacking structure of complex **3**.

| Intermolecular hydrogen bonding within complex <b>3</b> |         |         |         |
|---------------------------------------------------------|---------|---------|---------|
| Donor-H⋯Acceptor                                        | D-H (Å) | H-A (Å) | D-A (Å) |
| O(59)-H(59A)⋯O(30)                                      | 0.85    | 2.13    | 2.8471  |
| C(1)-H(1A)⋯O(33)                                        | 0.97    | 2.52    | 3.4144  |
| C(4)-H(4A)⋯O(24)                                        | 0.96    | 2.56    | 3.4429  |
| C(10)-H(10C)⋯O(34)                                      | 0.96    | 2.60    | 3.4759  |
| C(15)-H(15B)⋯O(10)                                      | 0.97    | 2.57    | 3.3034  |
| C(16)-H(16B)⋯O(10)                                      | 0.97    | 2.52    | 3.2459  |
| C(21)-H(21A)⋯O(39)                                      | 0.96    | 2.53    | 3.4810  |
| C(24)-H(24C)⋯O(30)                                      | 0.96    | 1.93    | 2.8097  |

|                                                  |         |         |         |
|--------------------------------------------------|---------|---------|---------|
| C(27)-H(27A)⋯O(40)                               | 0.96    | 2.59    | 3.4540  |
| C(35)-H(35B)⋯O(35)                               | 0.96    | 1.64    | 2.2441  |
| Intramolecular hydrogen bonding within complex 3 |         |         |         |
| Donor-H⋯Acceptor                                 | D-H (Å) | H-A (Å) | D-A (Å) |
| O(59)-H(59B)⋯O(47)                               | 0.85    | 2.51    | 2.9586  |
| C(5)-H(5B)⋯O(41)                                 | 0.96    | 2.52    | 3.2188  |
| C(7)-H(7C)⋯O(42)                                 | 0.96    | 2.59    | 3.2432  |
| C(16)-H(16A)⋯O(49)                               | 0.97    | 2.53    | 3.0790  |
| C(17)-H(17)⋯O(49)                                | 0.98    | 2.56    | 2.9689  |
| C(20)-H(20)⋯O(47)                                | 0.98    | 2.55    | 3.0328  |
| C(24)-H(24A)⋯O(50)                               | 0.96    | 2.11    | 2.9689  |
| C(24)-H(24A)⋯O(59)                               | 0.96    | 2.38    | 3.0663  |
| C(35)-H(35A)⋯O(54)                               | 0.96    | 1.80    | 2.7127  |

**Table S8** Weak interactions in the stacking structure of complex 4.

|                                                  |         |         |         |
|--------------------------------------------------|---------|---------|---------|
| Intermolecular hydrogen bonding within complex 4 |         |         |         |
| Donor-H⋯Acceptor                                 | D-H (Å) | H-A (Å) | D-A (Å) |
| O(59)-H(59A)⋯O(30)                               | 0.86    | 2.20    | 2.92(4) |
| C(1)-H(1A)⋯O(33)                                 | 0.97    | 2.52    | 3.44(3) |
| C(4)-H(4B)⋯O(24)                                 | 0.96    | 2.58    | 3.53(3) |
| C(16)-H(16B)⋯O(10)                               | 0.97    | 2.47    | 3.21(3) |
| C(21)-H(21A)⋯O(39)                               | 0.96    | 2.56    | 3.50(3) |
| C(24)-H(24B)⋯O(30)                               | 0.96    | 2.15    | 3.10(4) |
| C(27)-H(27A)⋯O(40)                               | 0.96    | 2.56    | 3.46(3) |
| C(35)-H(35B)⋯O(35)                               | 0.96    | 1.70    | 2.43(4) |
| C(39)-H(39C)⋯O(31)                               | 0.96    | 2.58    | 3.40(4) |
| Intramolecular hydrogen bonding within complex 4 |         |         |         |
| Donor-H⋯Acceptor                                 | D-H (Å) | H-A (Å) | D-A (Å) |
| O(59)-H(59B)⋯O(47)                               | 0.86    | 2.44    | 2.88(4) |
| C(7)-H(7C)⋯O(42)                                 | 0.96    | 2.53    | 3.18(3) |
| C(13)-H(13B)⋯O(53)                               | 0.96    | 2.27    | 3.22(3) |
| C(13)-H(13B)⋯O(53)                               | 0.96    | 2.57    | 2.98(3) |
| C(13)-H(13C)⋯O(53)                               | 0.96    | 2.23    | 2.98(3) |
| C(16)-H(16A)⋯O(49)                               | 0.97    | 2.53    | 3.07(4) |
| C(24)-H(24C)⋯O(50)                               | 0.96    | 2.10    | 2.95(4) |

|                    |      |      |         |
|--------------------|------|------|---------|
| C(30)-H(30A)⋯O(55) | 0.97 | 2.48 | 2.99(3) |
| C(35)-H(35C)⋯O(54) | 0.96 | 1.99 | 2.88(3) |

**Table S9** Weak interactions in the stacking structure of complex **5**.

| Intermolecular hydrogen bonding within complex <b>5</b> |         |         |         |
|---------------------------------------------------------|---------|---------|---------|
| Donor-H⋯Acceptor                                        | D-H (Å) | H-A (Å) | D-A (Å) |
| O(63)-H(63B)⋯N(2)                                       | 0.85    | 2.13    | 2.8608  |
| O(64)-H(64B)⋯N(1)                                       | 0.85    | 2.03    | 2.8109  |
| O(64)-H(64C)⋯O(6)                                       | 0.85    | 2.21    | 2.8982  |
| C(5)-H(5B)⋯O(12)                                        | 0.98    | 2.46    | 3.3456  |
| C(6)-H(6A)⋯O(14)                                        | 0.99    | 2.55    | 3.2802  |
| C(11)-H(11C)⋯O(9)                                       | 0.98    | 2.60    | 3.5420  |
| C(11)-H(11C)⋯O(17)                                      | 0.98    | 2.58    | 3.2986  |
| C(13)-H(13A)⋯O(14)                                      | 0.99    | 2.52    | 3.2954  |
| C(19)-H(19A)⋯O(4)                                       | 0.98    | 2.54    | 3.5104  |
| C(19)-H(19B)⋯O(4)                                       | 0.98    | 2.48    | 3.4450  |
| C(22)-H(22B)⋯O(3)                                       | 0.98    | 2.48    | 3.4147  |
| C(24)-H(24C)⋯O(24)                                      | 0.98    | 2.46    | 3.3540  |
| C(30)-H(30A)⋯O(16)                                      | 0.99    | 2.59    | 3.3529  |
| C(39)-H(39A)⋯N(4)                                       | 0.98    | 2.47    | 3.3854  |
| C(46)-H(46C)⋯O(24)                                      | 0.98    | 2.57    | 3.3972  |
| C(51)-H(51A)⋯O(1)                                       | 0.98    | 2.56    | 3.4019  |
| Intramolecular hydrogen bonding within complex <b>5</b> |         |         |         |
| Donor-H⋯Acceptor                                        | D-H (Å) | H-A (Å) | D-A (Å) |
| O(64)-H(64C)⋯O(63)                                      | 0.85    | 2.56    | 2.8986  |
| C(6)-H(6B)⋯O(61)                                        | 0.99    | 2.55    | 3.0826  |
| C(7)-H(7B)⋯O(61)                                        | 1.00    | 2.54    | 2.9674  |
| C(10)-H(10B)⋯O(60)                                      | 1.00    | 2.52    | 3.0233  |
| C(17)-H(17A)⋯O(48)                                      | 0.98    | 2.51    | 3.2309  |

**Table S10** Weak interactions in the stacking structure of complex **6**.

| Intermolecular hydrogen bonding within complex <b>6</b> |         |         |         |
|---------------------------------------------------------|---------|---------|---------|
| Donor-H⋯Acceptor                                        | D-H (Å) | H-A (Å) | D-A (Å) |
| O(59)-H(59A)⋯O(30)                                      | 0.87    | 2.26    | 2.9931  |
| C(21)-H(21B)⋯O(39)                                      | 0.96    | 2.59    | 3.5270  |

|                    |      |      |        |
|--------------------|------|------|--------|
| C(24)-H(24A)⋯O(30) | 0.96 | 2.31 | 3.1806 |
| C(27)-H(27A)⋯O(40) | 0.96 | 2.51 | 3.4004 |
| C(35)-H(35B)⋯O(11) | 0.96 | 2.53 | 3.3761 |
| C(35)-H(35B)⋯O(35) | 0.96 | 1.66 | 2.2651 |

Intramolecular hydrogen bonding within complex 6

| Donor-H⋯Acceptor   | D-H (Å) | H-A (Å) | D-A (Å) |
|--------------------|---------|---------|---------|
| O(59)-H(59B)⋯O(47) | 0.86    | 2.42    | 2.8680  |
| O(60)-H(60A)⋯O(53) | 0.87    | 2.60    | 2.9336  |
| C(20)-H(20)⋯O(47)  | 0.98    | 2.53    | 3.0231  |
| C(24)-H(24B)⋯O(50) | 0.96    | 2.37    | 3.1711  |
| C(33)-H(33B)⋯O(55) | 0.96    | 2.24    | 3.0851  |
| C(35)-H(35C)⋯O(54) | 0.96    | 2.25    | 2.9220  |

**Table S11** Weak interactions in the stacking structure of complex 7.

Intermolecular hydrogen bonding within complex 7

| Donor-H⋯Acceptor   | D-H (Å) | H-A (Å) | D-A (Å) |
|--------------------|---------|---------|---------|
| O(59)-H(59A)⋯O(30) | 0.86    | 2.28    | 2.9825  |
| C(1)-H(1A)⋯O(33)   | 0.97    | 2.50    | 3.3781  |
| C(4)-H(4A)⋯O(24)   | 0.96    | 2.51    | 3.4293  |
| C(10)-H(10A)⋯O(34) | 0.96    | 2.54    | 3.4298  |
| C(13)-H(13A)⋯O(36) | 0.96    | 2.58    | 3.5374  |
| C(21)-H(21A)⋯O(23) | 0.96    | 2.59    | 3.3043  |
| C(24)-H(24C)⋯O(30) | 0.96    | 1.90    | 2.6978  |
| C(27)-H(27A)⋯O(40) | 0.96    | 2.52    | 3.3981  |
| C(35)-H(35B)⋯O(35) | 0.96    | 1.84    | 2.2683  |

Intramolecular hydrogen bonding within complex 7

| Donor-H⋯Acceptor   | D-H (Å) | H-A (Å) | D-A (Å) |
|--------------------|---------|---------|---------|
| O(59)-H(59A)⋯O(60) | 0.86    | 2.55    | 2.8319  |
| O(59)-H(59B)⋯O(47) | 0.86    | 2.37    | 2.8267  |
| O(60)-H(60A)⋯O(53) | 0.86    | 2.56    | 2.8767  |
| C(16)-H(16A)⋯O(49) | 0.97    | 2.53    | 3.1130  |
| C(17)-H(17)⋯O(49)  | 0.98    | 2.52    | 2.9404  |
| C(20)-H(20)⋯O(47)  | 0.98    | 2.55    | 3.0621  |
| C(24)-H(33C)⋯O(50) | 0.96    | 2.46    | 3.0854  |
| C(33)-H(35C)⋯O(55) | 0.96    | 2.30    | 3.0911  |

|                    |      |      |        |
|--------------------|------|------|--------|
| C(35)-H(35C)⋯O(54) | 0.96 | 2.02 | 2.9053 |
|--------------------|------|------|--------|

**Table S12** Weak interactions in the stacking structure of complex **8**.

| Intermolecular hydrogen bonding within complex <b>8</b> |         |         |         |
|---------------------------------------------------------|---------|---------|---------|
| Donor-H⋯Acceptor                                        | D-H (Å) | H-A (Å) | D-A (Å) |
| O(59)-H(59A)⋯O(30)                                      | 0.86    | 2.19    | 2.9051  |
| C(1)-H(1A)⋯O(33)                                        | 0.97    | 2.49    | 3.3916  |
| C(4)-H(4B)⋯O(24)                                        | 0.96    | 2.55    | 3.4904  |
| C(6)-H(6)⋯O(15)                                         | 0.98    | 2.58    | 3.5322  |
| C(13)-H(13B)⋯O(17)                                      | 0.96    | 2.46    | 3.3977  |
| C(24)-H(24A)⋯O(30)                                      | 0.96    | 2.33    | 3.2849  |
| C(25)-H(25A)⋯O(5)                                       | 0.96    | 2.59    | 3.5322  |
| C(27)-H(27A)⋯O(40)                                      | 0.96    | 2.60    | 3.5004  |
| C(30)-H(30B)⋯O(7)                                       | 0.97    | 2.50    | 3.3158  |
| C(35)-H(35A)⋯O(35)                                      | 0.96    | 1.78    | 2.3053  |
| C(35)-H(35B)⋯O(17)                                      | 0.96    | 2.55    | 3.4327  |
| Intramolecular hydrogen bonding within complex <b>8</b> |         |         |         |
| Donor-H⋯Acceptor                                        | D-H (Å) | H-A (Å) | D-A (Å) |
| O(60)-H(60A)⋯O(53)                                      | 0.87    | 2.59    | 2.8791  |
| C(17)-H(17)⋯O(49)                                       | 0.98    | 2.56    | 2.9494  |
| C(24)-H(24A)⋯O(59)                                      | 0.96    | 2.54    | 2.9861  |
| C(24)-H(24B)⋯O(50)                                      | 0.96    | 1.73    | 2.6275  |
| C(33)-H(33A)⋯O(55)                                      | 0.96    | 2.45    | 3.1656  |
| C(35)-H(35C)⋯O(54)                                      | 0.96    | 2.06    | 2.9783  |

**Table S13** Weak interactions in the stacking structure of complex **9**.

| Intermolecular hydrogen bonding within complex <b>9</b> |         |         |         |
|---------------------------------------------------------|---------|---------|---------|
| Donor-H⋯Acceptor                                        | D-H (Å) | H-A (Å) | D-A (Å) |
| O(59)-H(59A)⋯N(1)                                       | 0.88    | 2.27    | 3.0788  |
| O(60)-H(60A)⋯O(6)                                       | 0.87    | 2.26    | 2.9110  |
| O(60)-H(60B)⋯N(3)                                       | 0.87    | 2.02    | 2.8196  |
| C(6)-H(6B)⋯O(17)                                        | 0.96    | 2.49    | 3.3442  |
| C(7)-H(7B)⋯O(27)                                        | 0.97    | 2.57    | 3.2704  |
| C(8)-H(8B)⋯O(27)                                        | 0.97    | 2.54    | 3.2936  |
| C(11)-H(11B)⋯O(35)                                      | 0.96    | 2.59    | 3.2710  |



|                    |      |      |        |
|--------------------|------|------|--------|
| C(17)-H(17B)⋯O(25) | 0.96 | 2.56 | 3.5045 |
| C(17)-H(17C)⋯O(25) | 0.96 | 2.54 | 3.4819 |
| C(22)-H(22A)⋯O(16) | 0.97 | 2.50 | 3.4057 |
| C(28)-H(28B)⋯O(18) | 0.96 | 2.52 | 3.3503 |
| C(29)-H(29B)⋯O(19) | 0.96 | 2.55 | 3.3696 |
| C(32)-H(32C)⋯O(12) | 0.96 | 2.56 | 3.4222 |
| C(40)-H(40B)⋯N(4)  | 0.96 | 2.54 | 3.4108 |
| C(45)-H(45B)⋯O(18) | 0.96 | 2.59 | 3.4057 |

Intramolecular hydrogen bonding within complex **9**

| Donor-H⋯Acceptor   | D-H (Å) | H-A (Å) | D-A (Å) |
|--------------------|---------|---------|---------|
| O(59)-H(59B)⋯O(60) | 0.88    | 2.51    | 2.8570  |
| O(60)-H(60A)⋯O(59) | 0.87    | 2.49    | 2.8570  |
| C(7)-H(7A)⋯O(45)   | 0.97    | 2.53    | 3.0556  |
| C(13)-H(13)⋯O(45)  | 0.98    | 2.54    | 2.9397  |
| C(20)-H(20A)⋯O(47) | 0.96    | 2.55    | 3.2716  |
| C(25)-H(25C)⋯O(52) | 0.96    | 2.60    | 3.2511  |

**Table S14** Weak interactions in the stacking structure of complex **10**.

Intermolecular hydrogen bonding within complex **10**

| Donor-H⋯Acceptor   | D-H (Å) | H-A (Å) | D-A (Å) |
|--------------------|---------|---------|---------|
| O(59)-H(59A)⋯O(30) | 0.85    | 2.09    | 2.9066  |
| O(60)-H(60D)⋯O(21) | 0.85    | 2.11    | 2.9556  |
| O(1)-H(1B)⋯O(37)   | 0.97    | 2.41    | 3.3776  |
| C(3)-H(3)⋯O(37)    | 0.98    | 2.41    | 3.3018  |
| C(10)-H(10A)⋯O(9)  | 0.96    | 2.59    | 3.5432  |
| C(16)-H(16B)⋯O(40) | 0.97    | 2.56    | 3.5271  |
| C(27)-H(27C)⋯O(22) | 0.96    | 2.29    | 3.1795  |
| C(38)-H(38A)⋯O(27) | 0.96    | 2.37    | 3.2720  |
| C(39)-H(39B)⋯O(30) | 0.96    | 2.11    | 2.6685  |
| C(39)-H(39C)⋯O(23) | 0.96    | 1.86    | 2.5089  |
| C(41)-H(41A)⋯O(9)  | 0.96    | 2.54    | 3.4058  |

Intramolecular hydrogen bonding within complex **10**

| Donor-H⋯Acceptor   | D-H (Å) | H-A (Å) | D-A (Å) |
|--------------------|---------|---------|---------|
| O(60)-H(60C)⋯O(53) | 0.85    | 2.48    | 2.9930  |
| O(60)-H(60C)⋯O(54) | 0.85    | 2.21    | 3.0591  |

|                      |      |      |        |
|----------------------|------|------|--------|
| C(6)-H(6)···O(41)    | 0.98 | 2.44 | 2.9722 |
| C(15)-H(15B)···O(15) | 0.97 | 2.38 | 3.2159 |
| C(20)-H(20)···O(12)  | 0.98 | 2.20 | 2.8927 |
| C(22)-H(22A)···O(14) | 0.96 | 2.33 | 3.1966 |
| C(22)-H(22B)···O(15) | 0.96 | 1.97 | 2.5721 |
| C(30)-H(30A)···O(52) | 0.96 | 2.60 | 3.5579 |
| C(39)-H(39B)···O(58) | 0.96 | 2.29 | 3.0666 |

**Table S15** Weak interactions in the stacking structure of complex **11**.

| Intermolecular hydrogen bonding within complex <b>11</b> |         |         |         |
|----------------------------------------------------------|---------|---------|---------|
| Donor-H···Acceptor                                       | D-H (Å) | H-A (Å) | D-A (Å) |
| O(60)-H(60A)···N(2)                                      | 0.88    | 2.03    | 2.8781  |
| O(60)-H(60B)···O(40)                                     | 0.88    | 2.11    | 2.9243  |
| C(3)-H(3B)···O(64)                                       | 0.98    | 2.39    | 3.3122  |
| C(6)-H(6B)···O(2)                                        | 0.98    | 2.54    | 3.4049  |
| C(7)-H(7B)···O(9)                                        | 0.99    | 2.57    | 3.3607  |
| C(18)-H(18A)···O(9)                                      | 0.98    | 2.55    | 3.5039  |
| C(18)-H(18C)···O(62)                                     | 0.98    | 2.42    | 3.2109  |
| C(19)-H(19)···O(31)                                      | 1.00    | 2.50    | 3.4030  |
| C(21)-H(21B)···O(32)                                     | 0.99    | 2.53    | 3.3062  |
| C(22)-H(22A)···O(19)                                     | 0.99    | 2.31    | 3.1732  |
| C(22)-H(22B)···O(20)                                     | 0.99    | 2.40    | 3.1919  |
| C(26)-H(22B)···O(15)                                     | 0.98    | 2.31    | 3.2828  |
| C(30)-H(30)···O(37)                                      | 1.00    | 2.36    | 3.3103  |
| C(35)-H(35B)···O(37)                                     | 0.99    | 2.51    | 3.5028  |
| C(40)-H(40B)···O(63)                                     | 0.98    | 2.55    | 3.2972  |
| C(46)-H(46B)···O(22)                                     | 0.98    | 2.20    | 3.0568  |
| C(46)-H(46C)···O(35)                                     | 0.98    | 2.56    | 3.2871  |
| Intramolecular hydrogen bonding within complex <b>11</b> |         |         |         |
| Donor-H···Acceptor                                       | D-H (Å) | H-A (Å) | D-A (Å) |
| O(59)-H(59A)···O(57)                                     | 0.89    | 2.40    | 2.8013  |
| O(59)-H(59B)···O(57)                                     | 0.89    | 2.40    | 2.8013  |
| O(60)-H(60B)···O(53)                                     | 0.88    | 2.37    | 2.6742  |
| C(7)-H(7A)···O(48)                                       | 0.99    | 2.58    | 3.5692  |
| C(10)-H(10)···O(51)                                      | 1.00    | 2.58    | 3.5438  |

---

|                     |      |      |        |
|---------------------|------|------|--------|
| C(19)-H(19)···O(49) | 1.00 | 2.42 | 2.8589 |
| C(33)-H(33)···O(44) | 1.00 | 2.52 | 2.9748 |
| C(41)-H(41)···O(43) | 1.00 | 2.59 | 3.0328 |

---
