# Supplementary figures and images for: A series of rare-earth phosphine-oxygen complexes containing [PW12O40]3− with highly efficient photocatalytic degradation of MB
Source: Royal Society of Chemistry journal article supplement (doi:10.1039/d4ce00851k), 2024-01-01

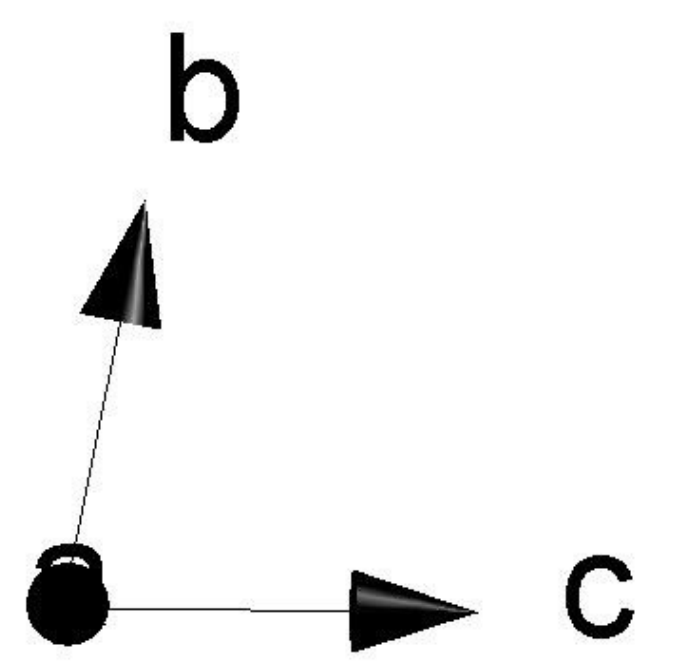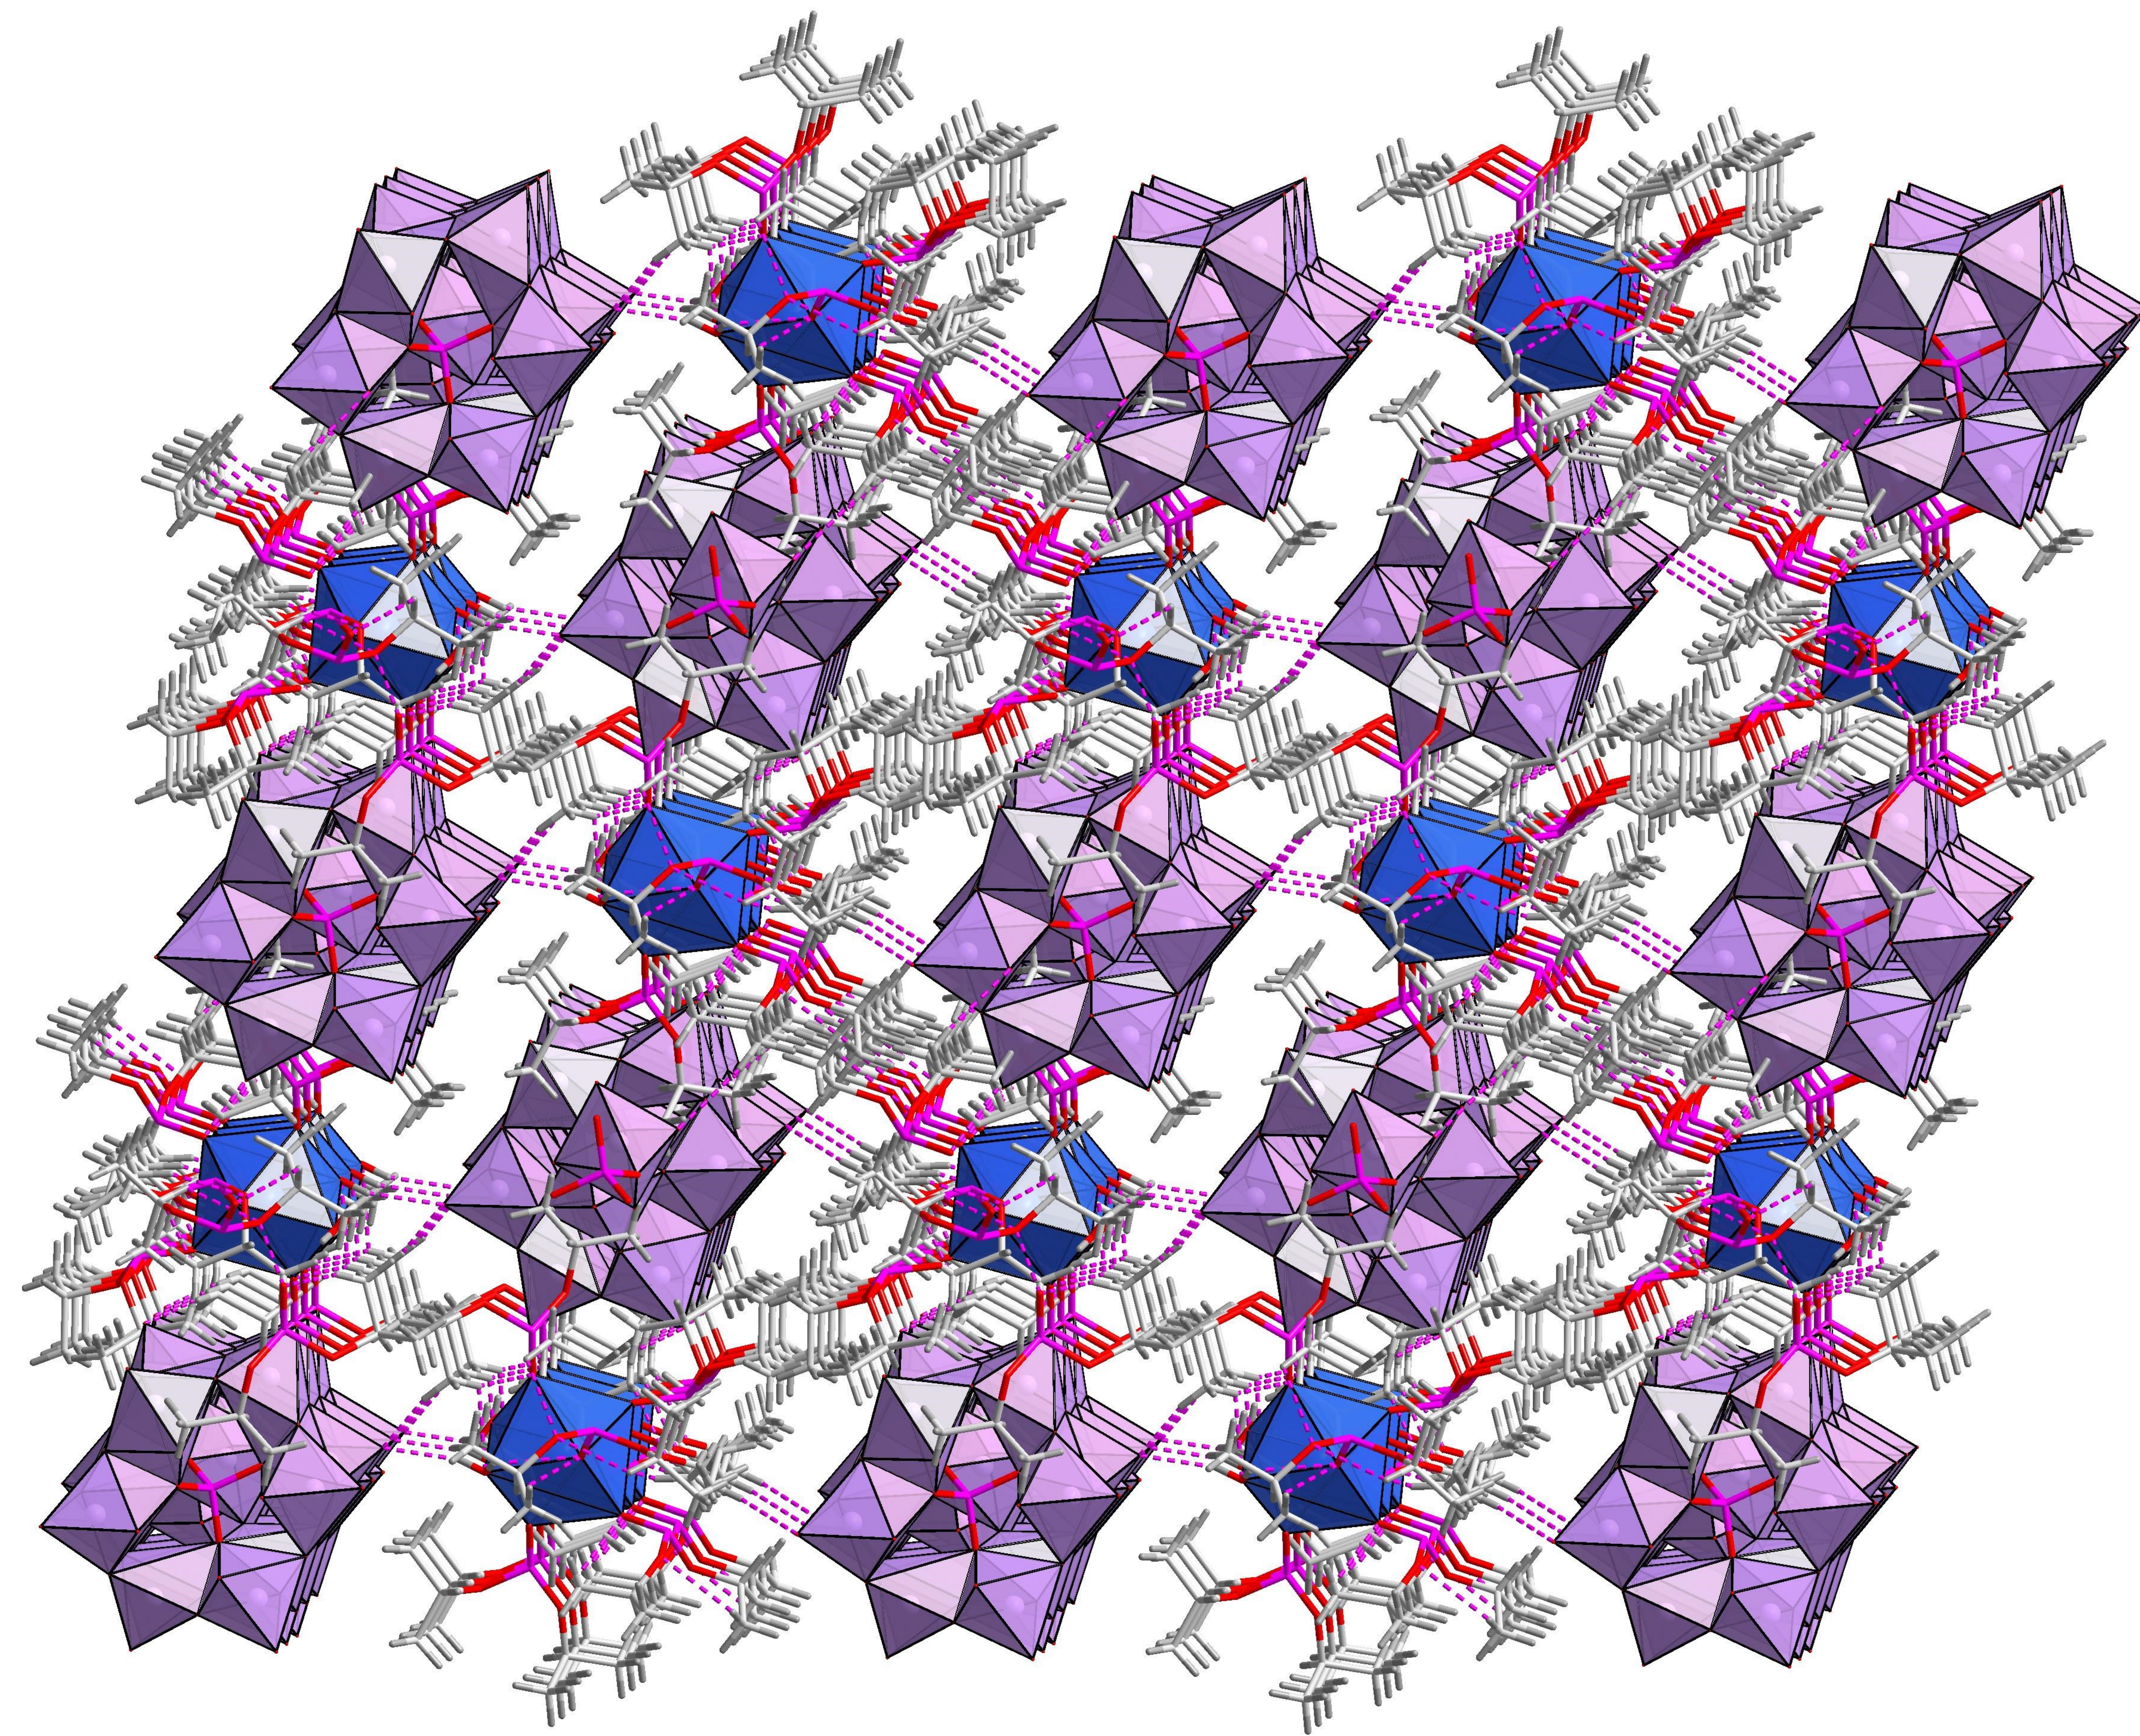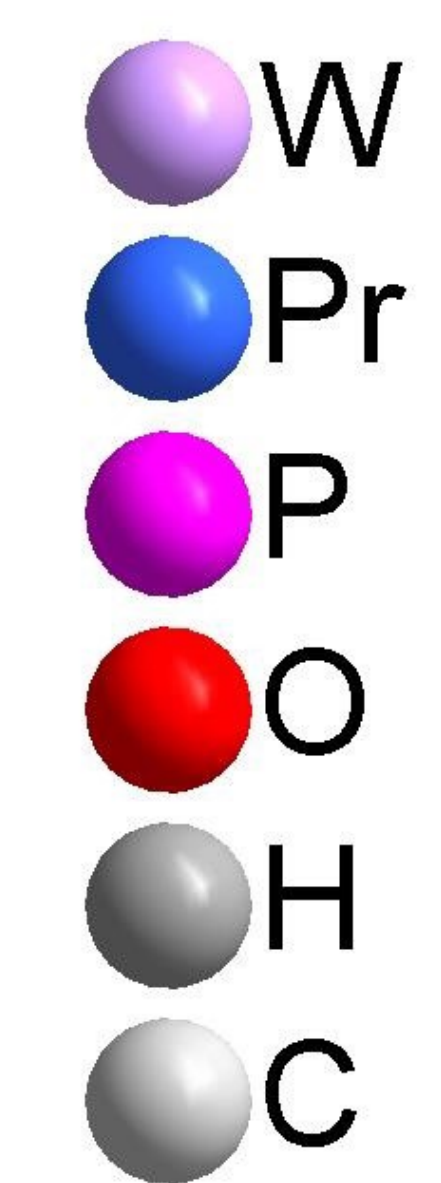

Supplement: d4ce00851k1.pdf [file d4ce00851k1.pdf]

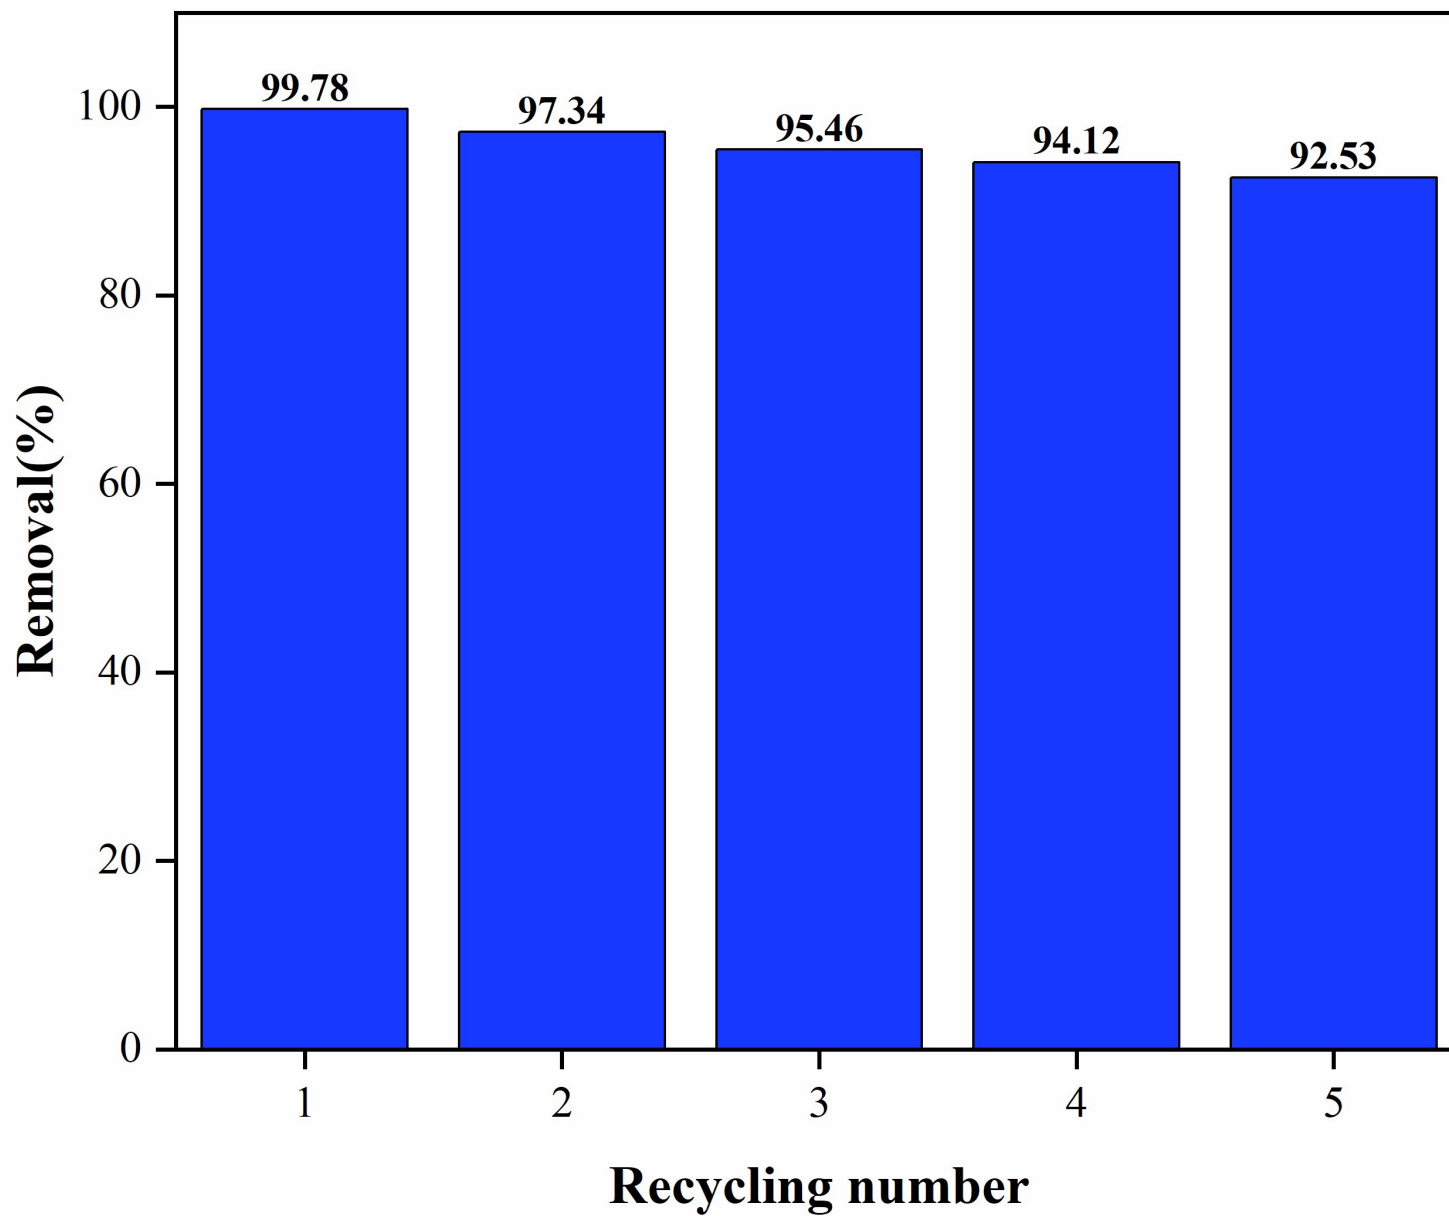

Supplement: d4ce00851k10.pdf [file d4ce00851k10.pdf]

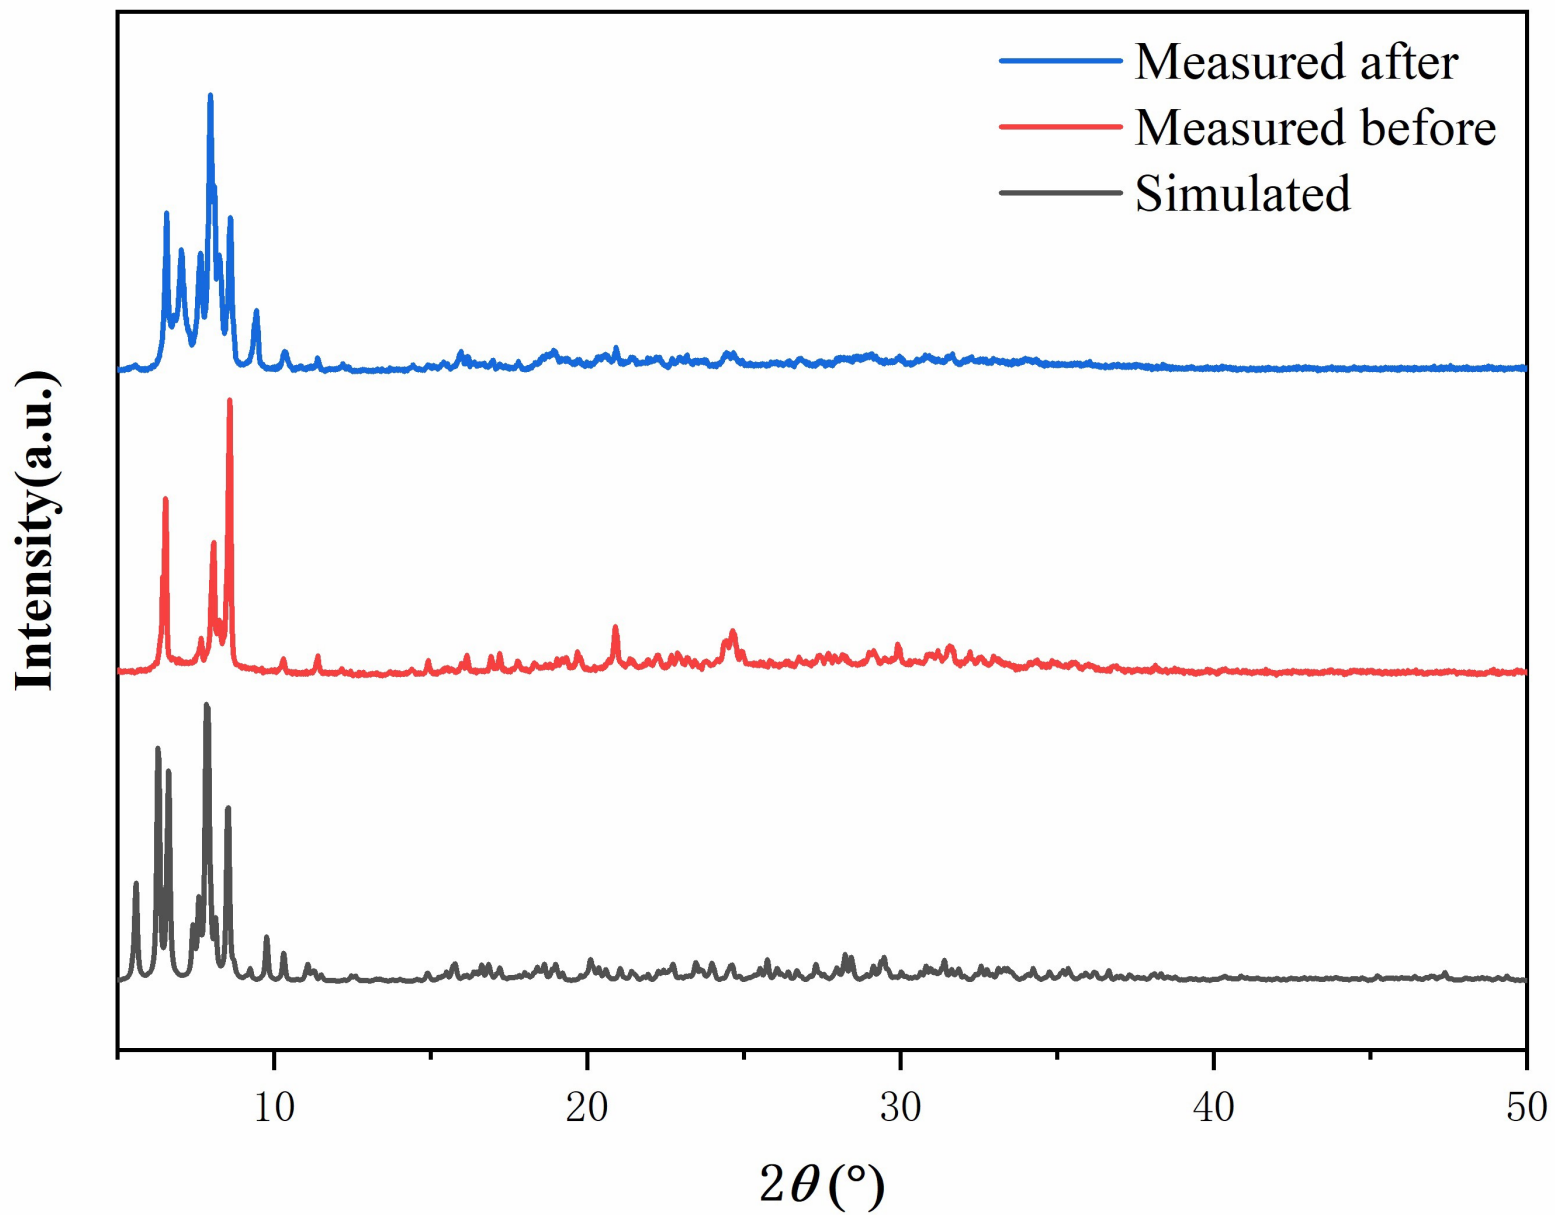

Supplement: d4ce00851k11.pdf [file d4ce00851k11.pdf]

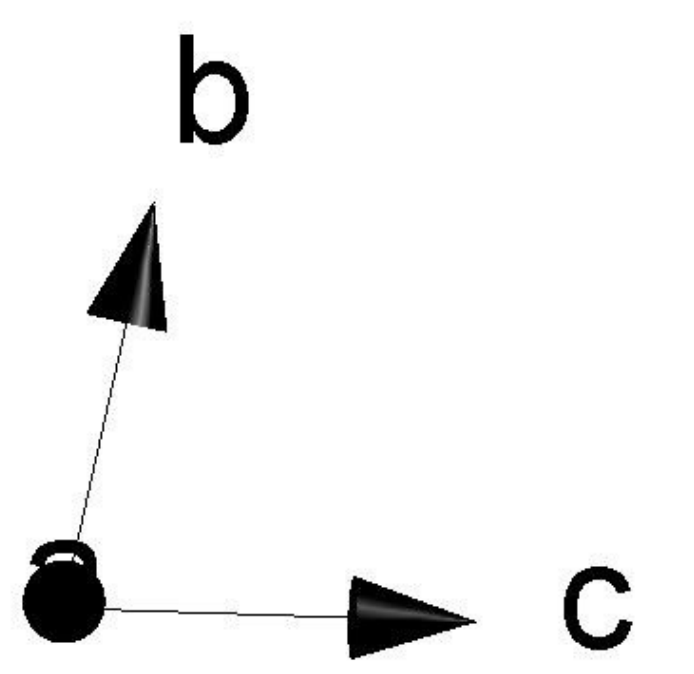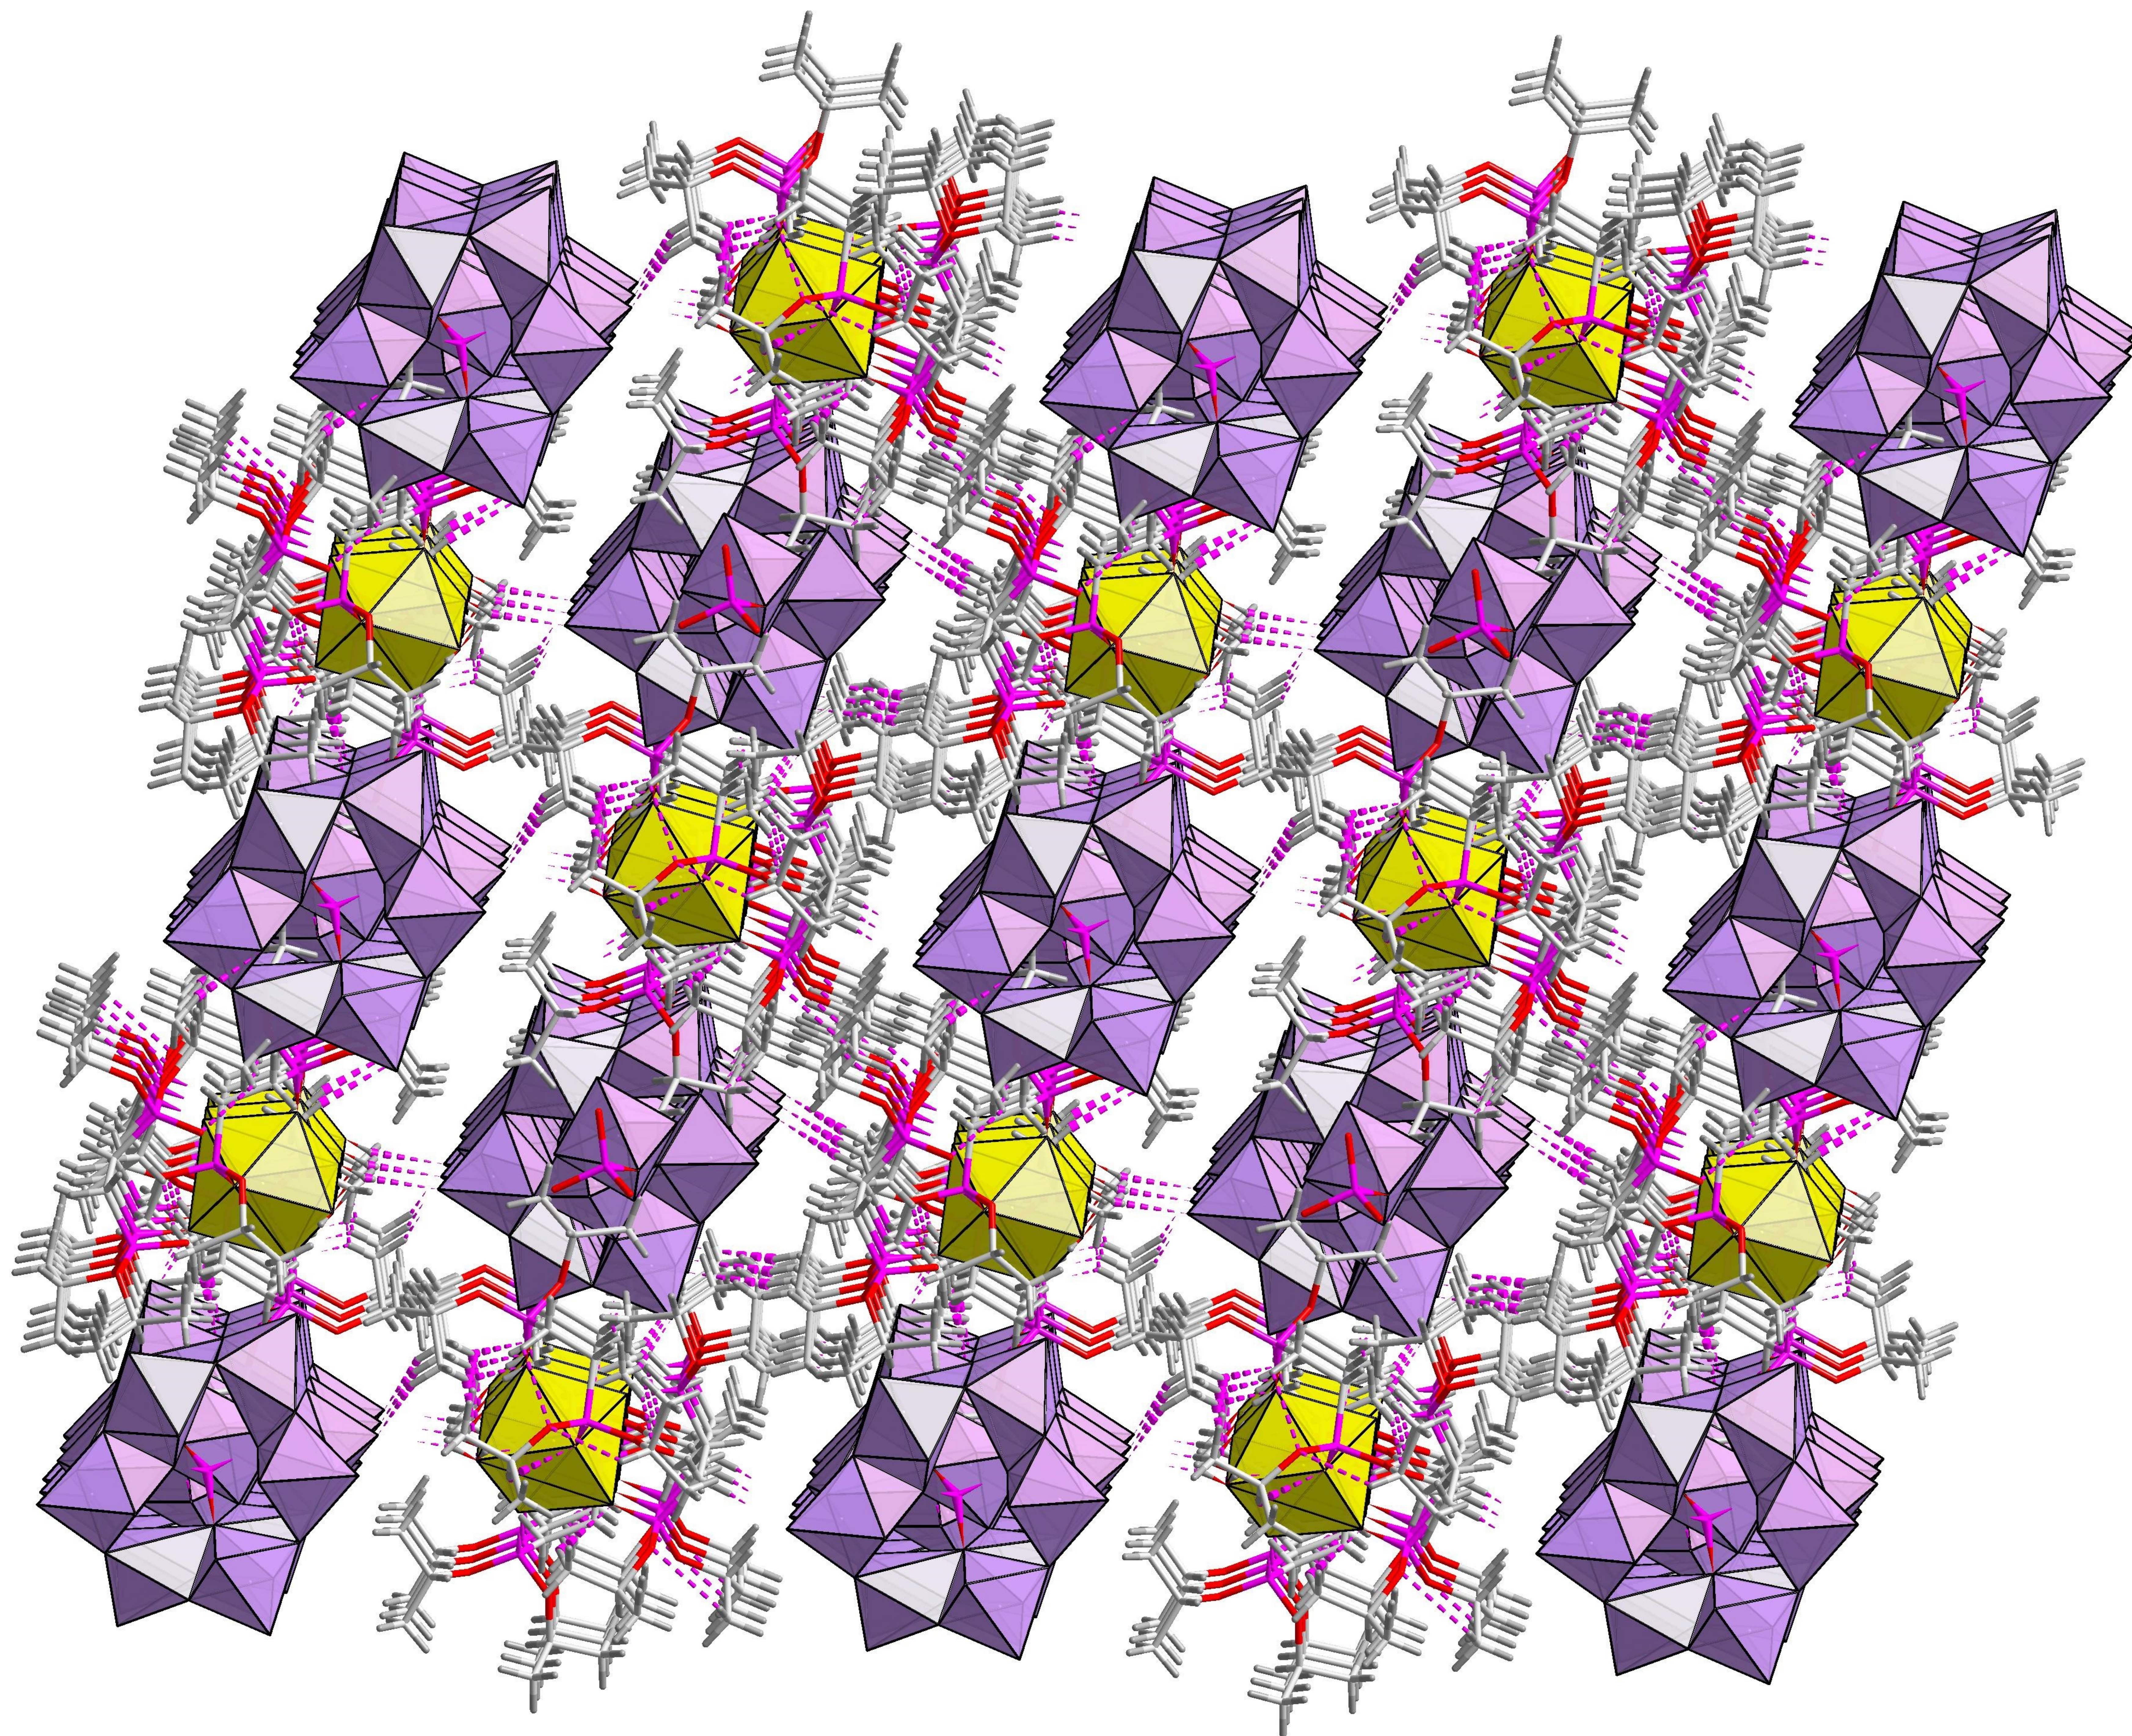

- W
- Nd
- O
- H
- P
- C

Supplement: d4ce00851k12.pdf [file d4ce00851k12.pdf]

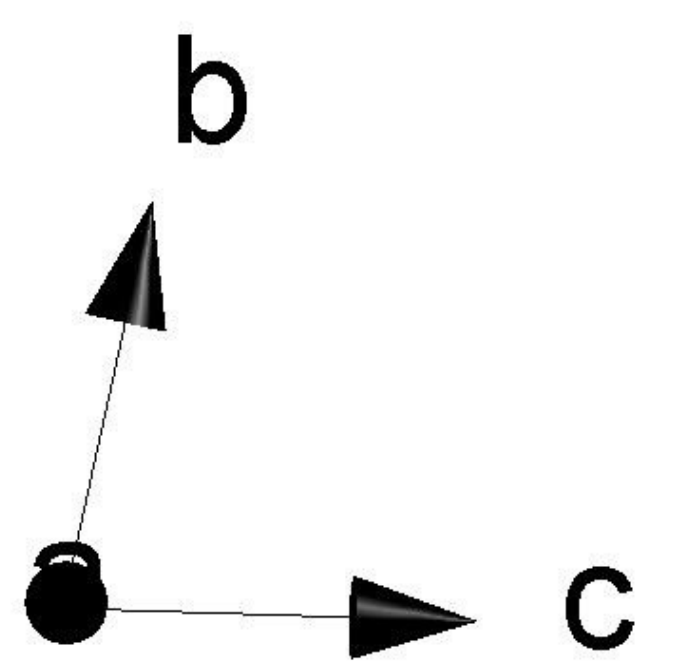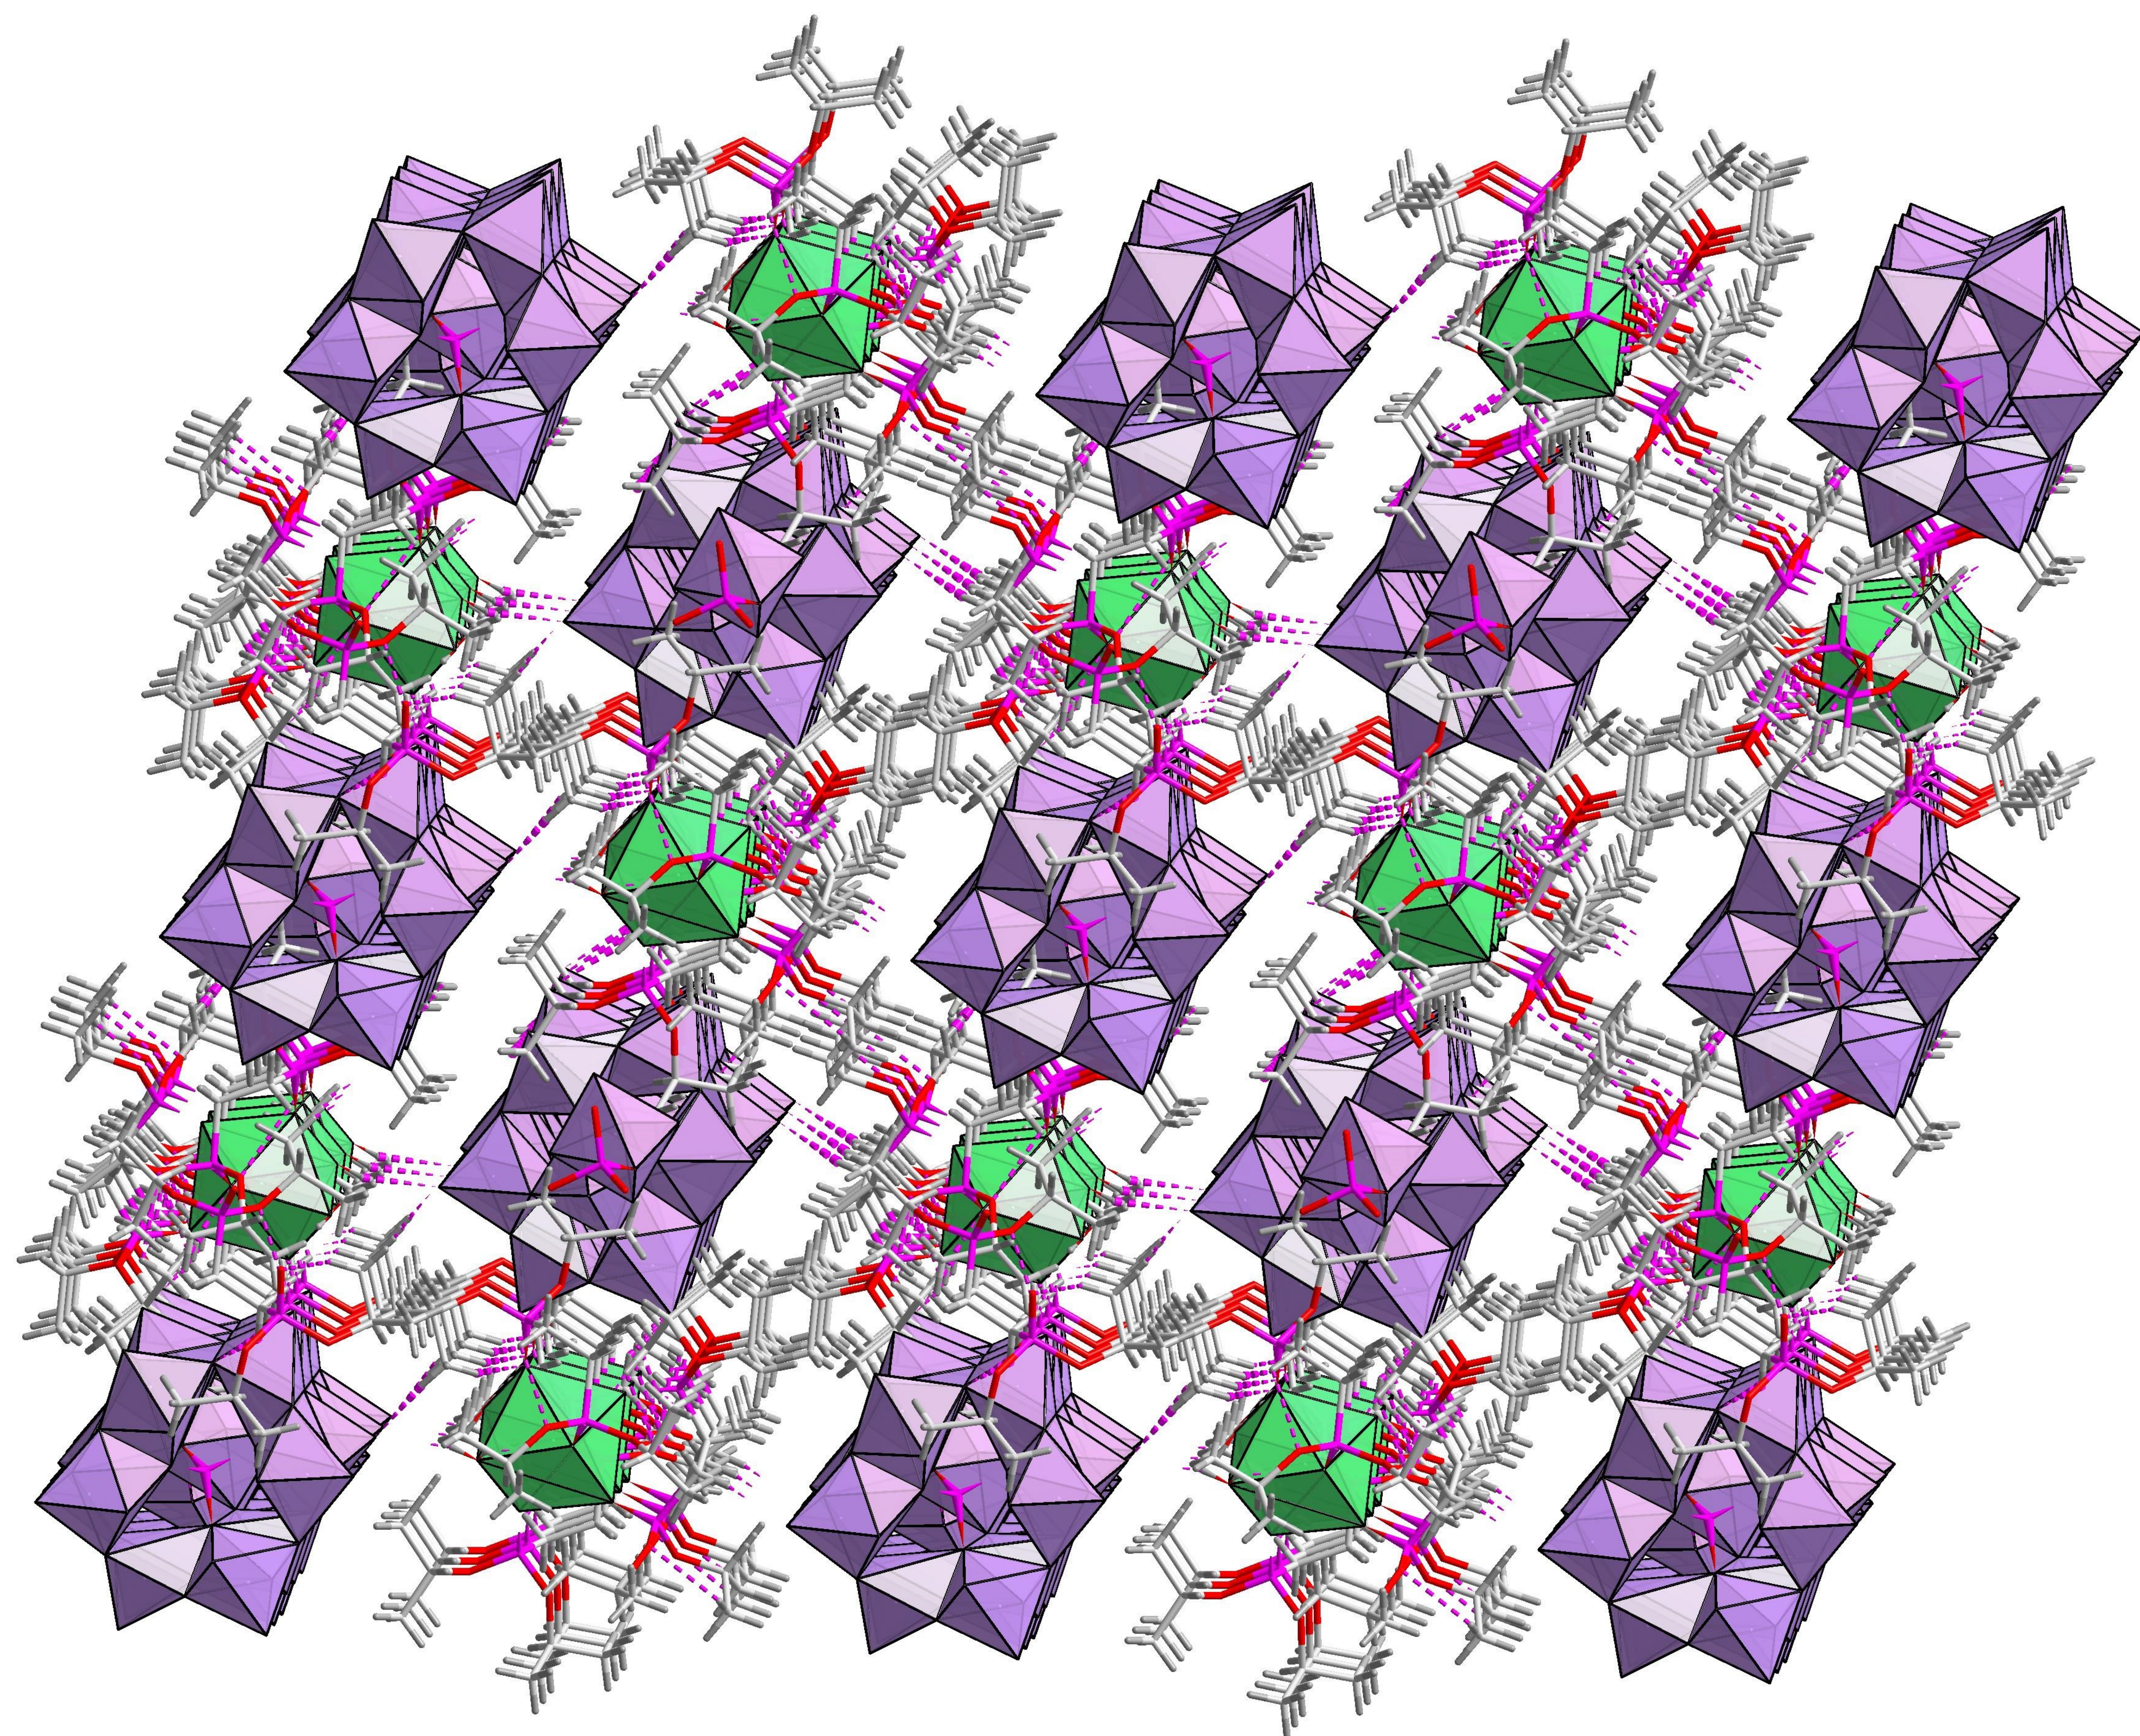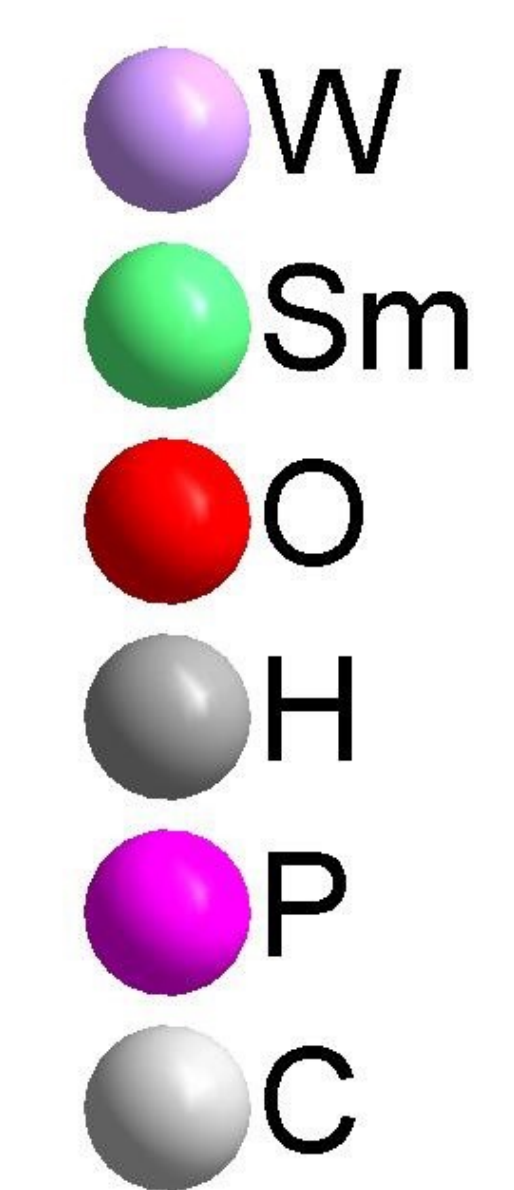

Supplement: d4ce00851k13.pdf [file d4ce00851k13.pdf]

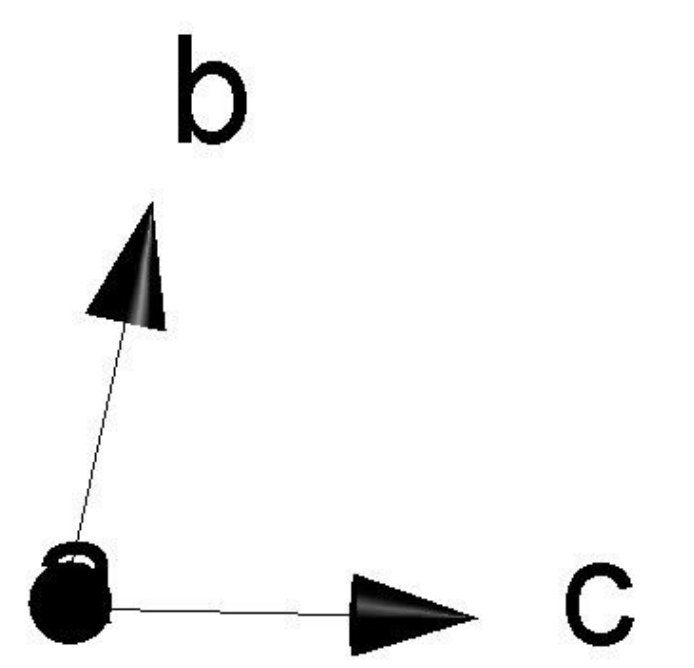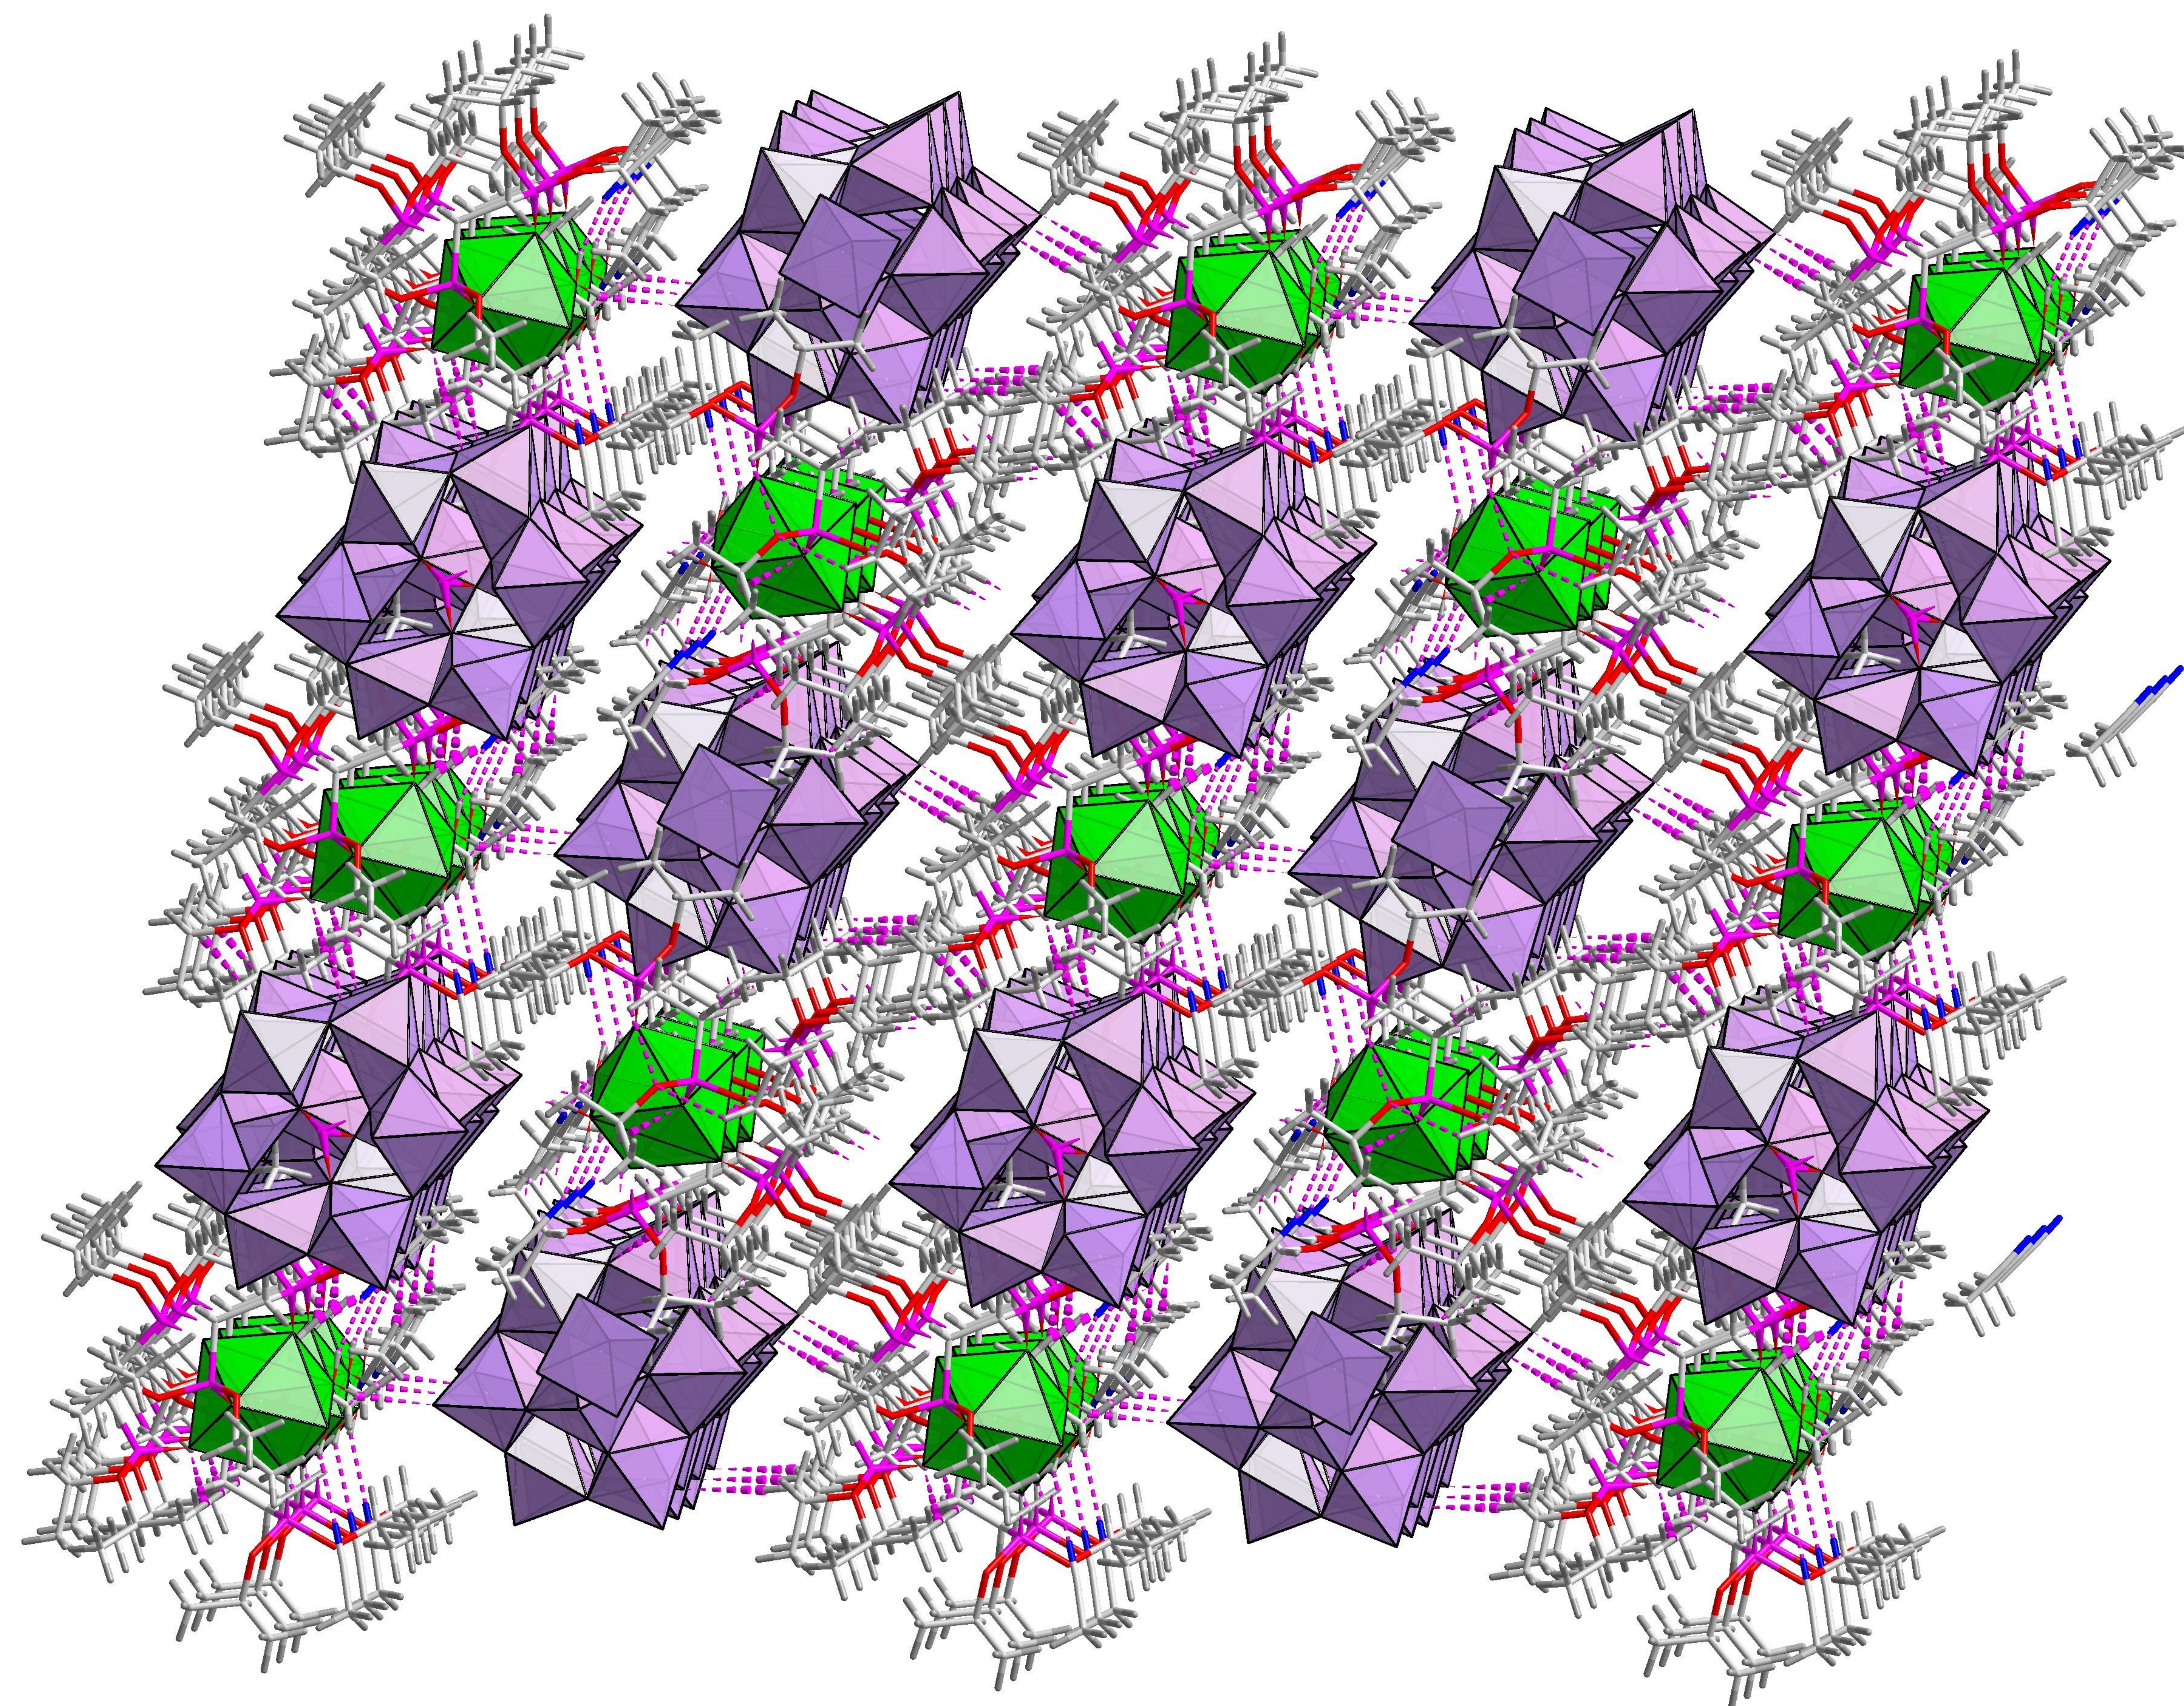

- W
- Eu
- P
- O
- H
- C
- N

Supplement: d4ce00851k14.pdf [file d4ce00851k14.pdf]

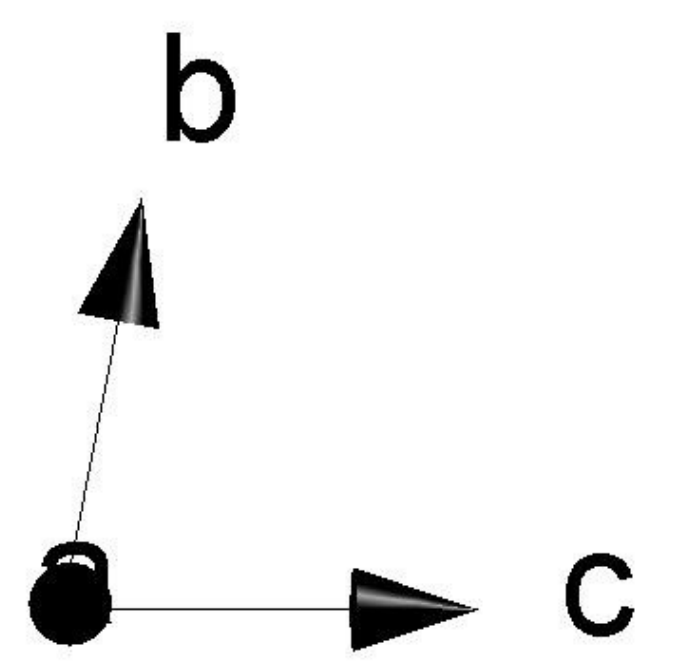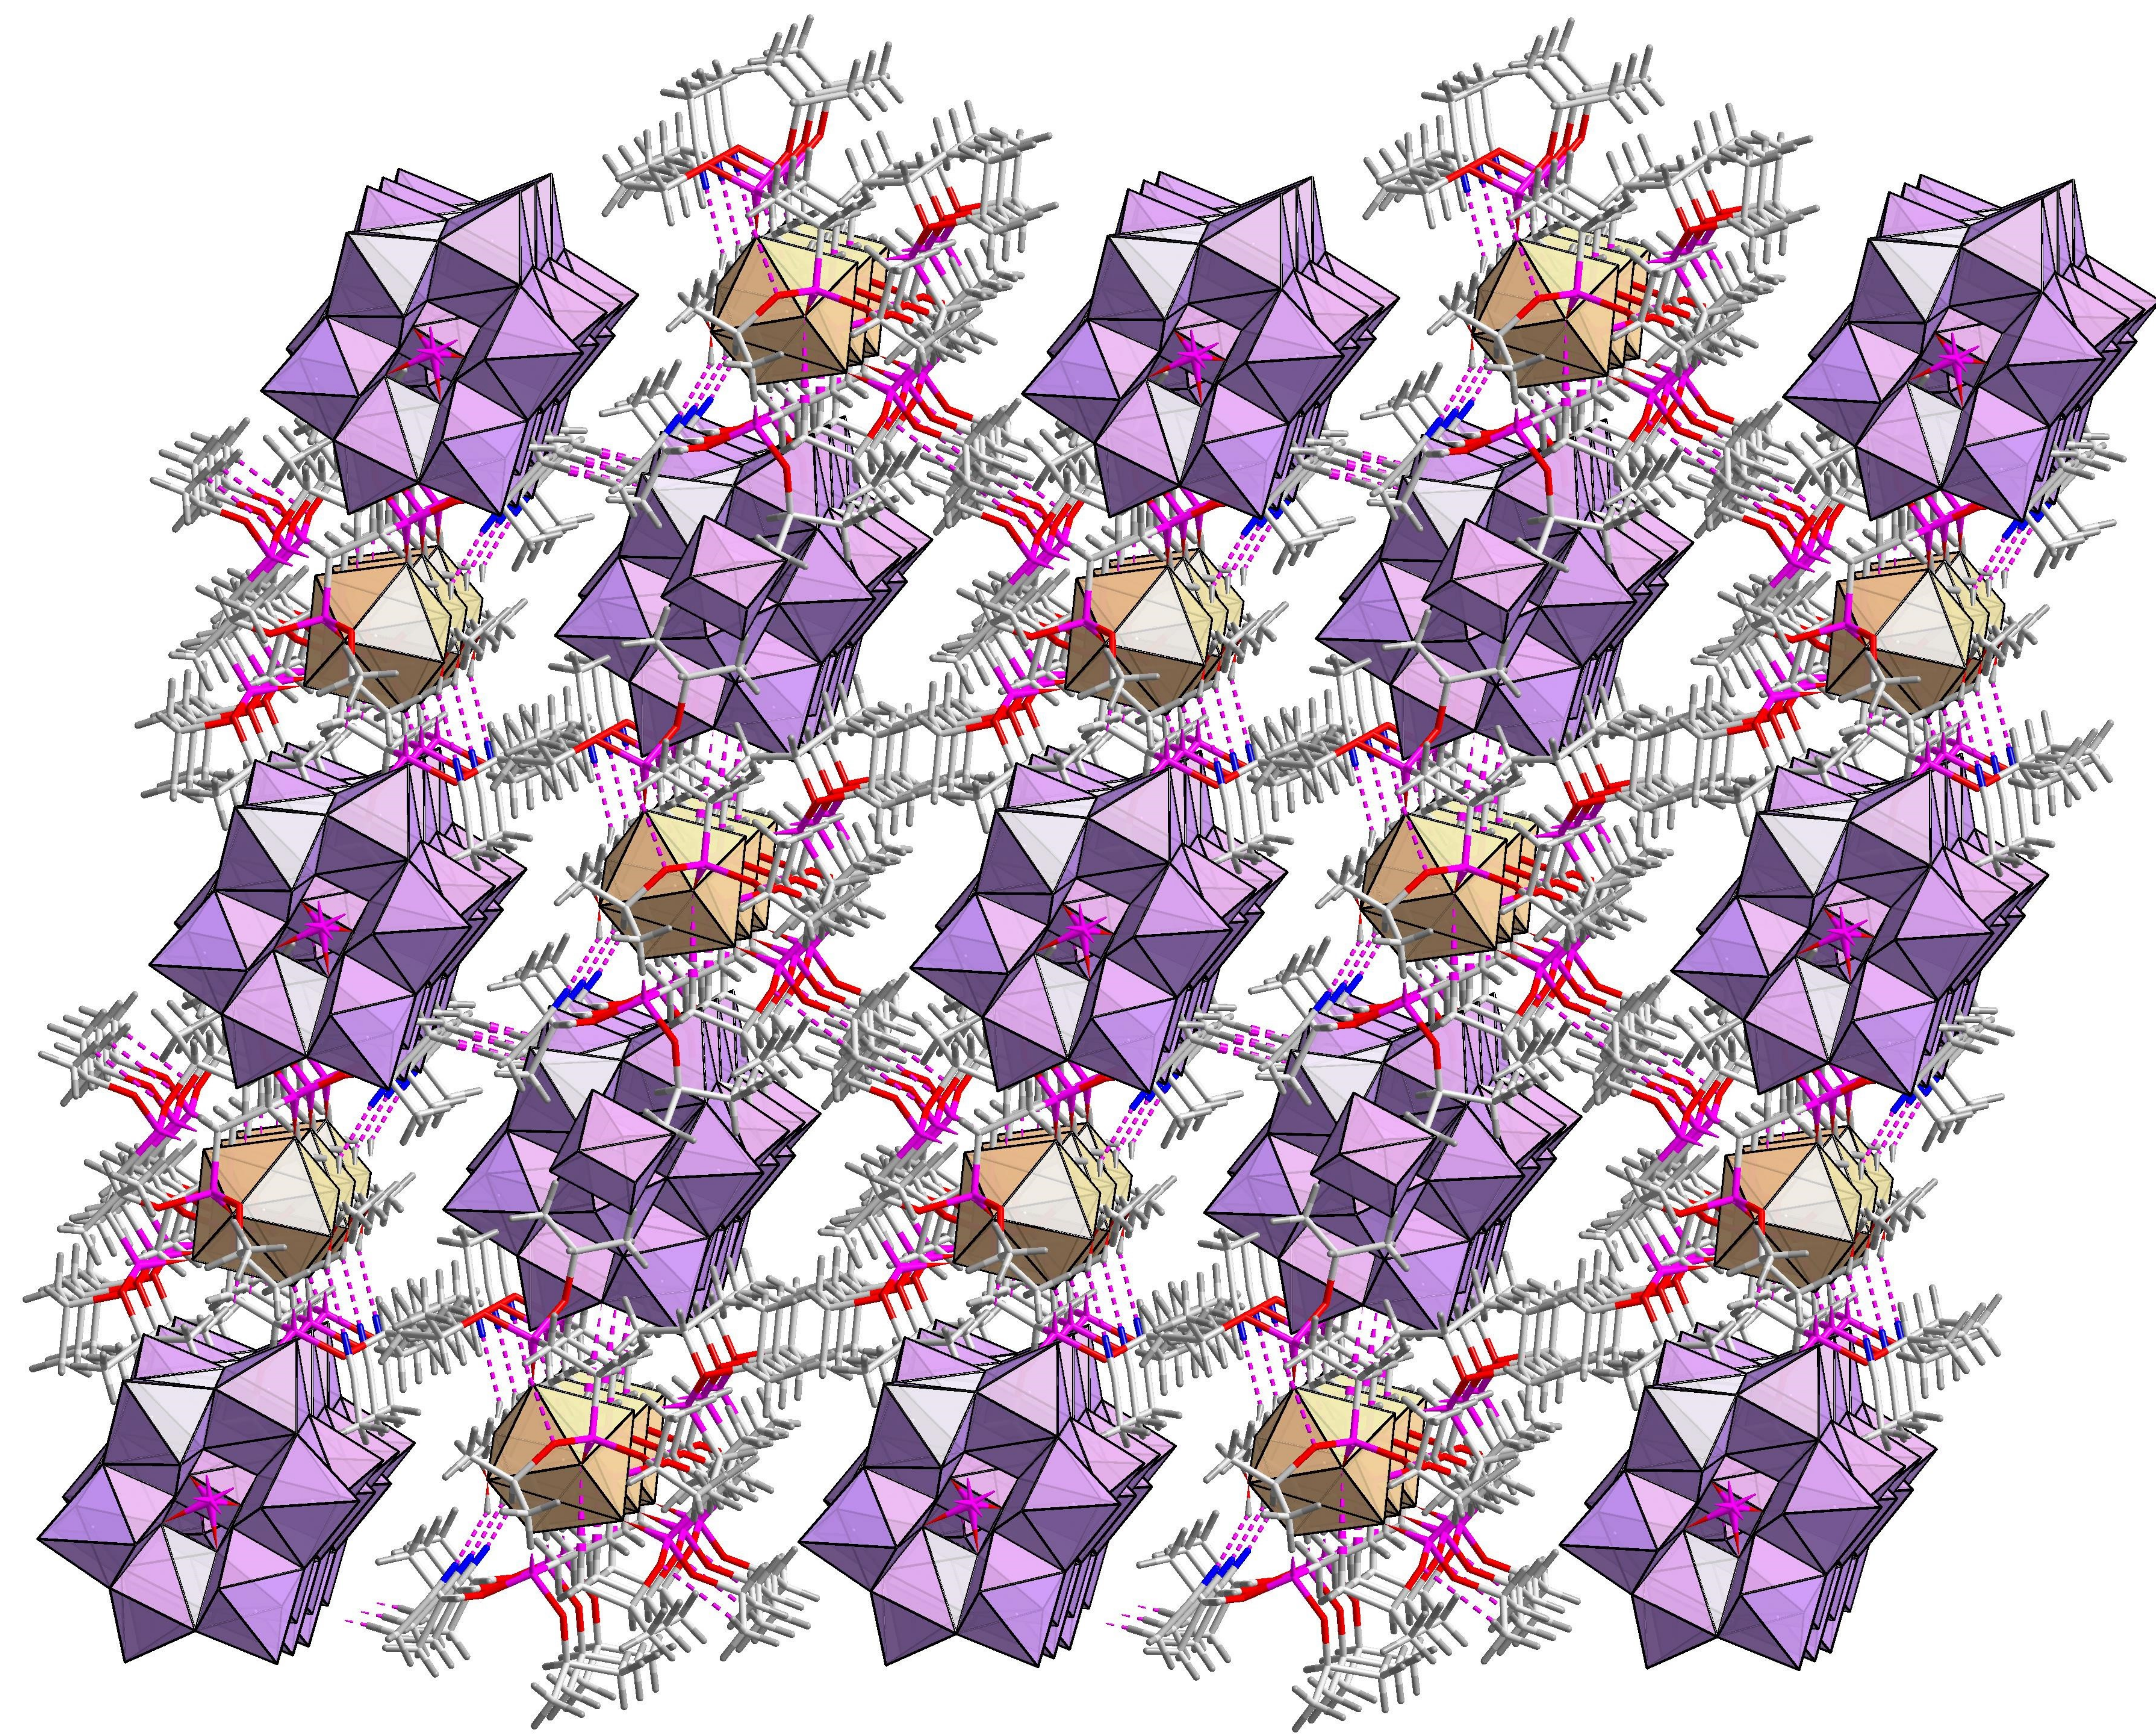

- W
- P
- O
- Gd
- H
- C
- N

Supplement: d4ce00851k15.pdf [file d4ce00851k15.pdf]

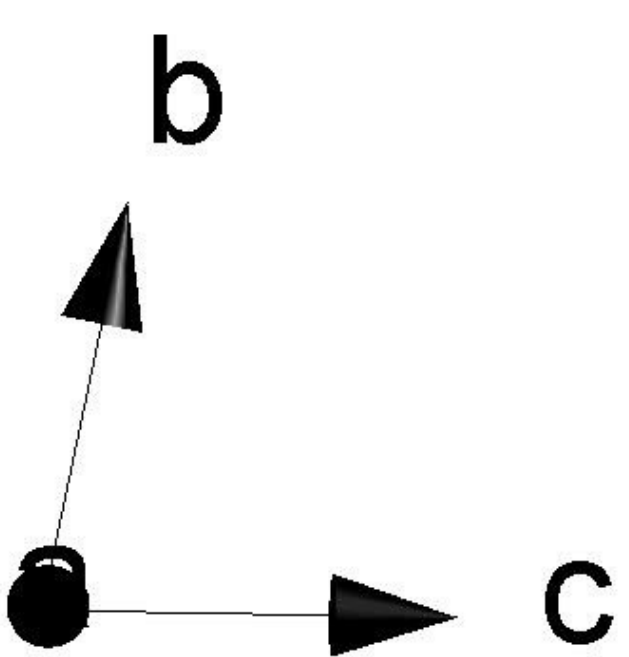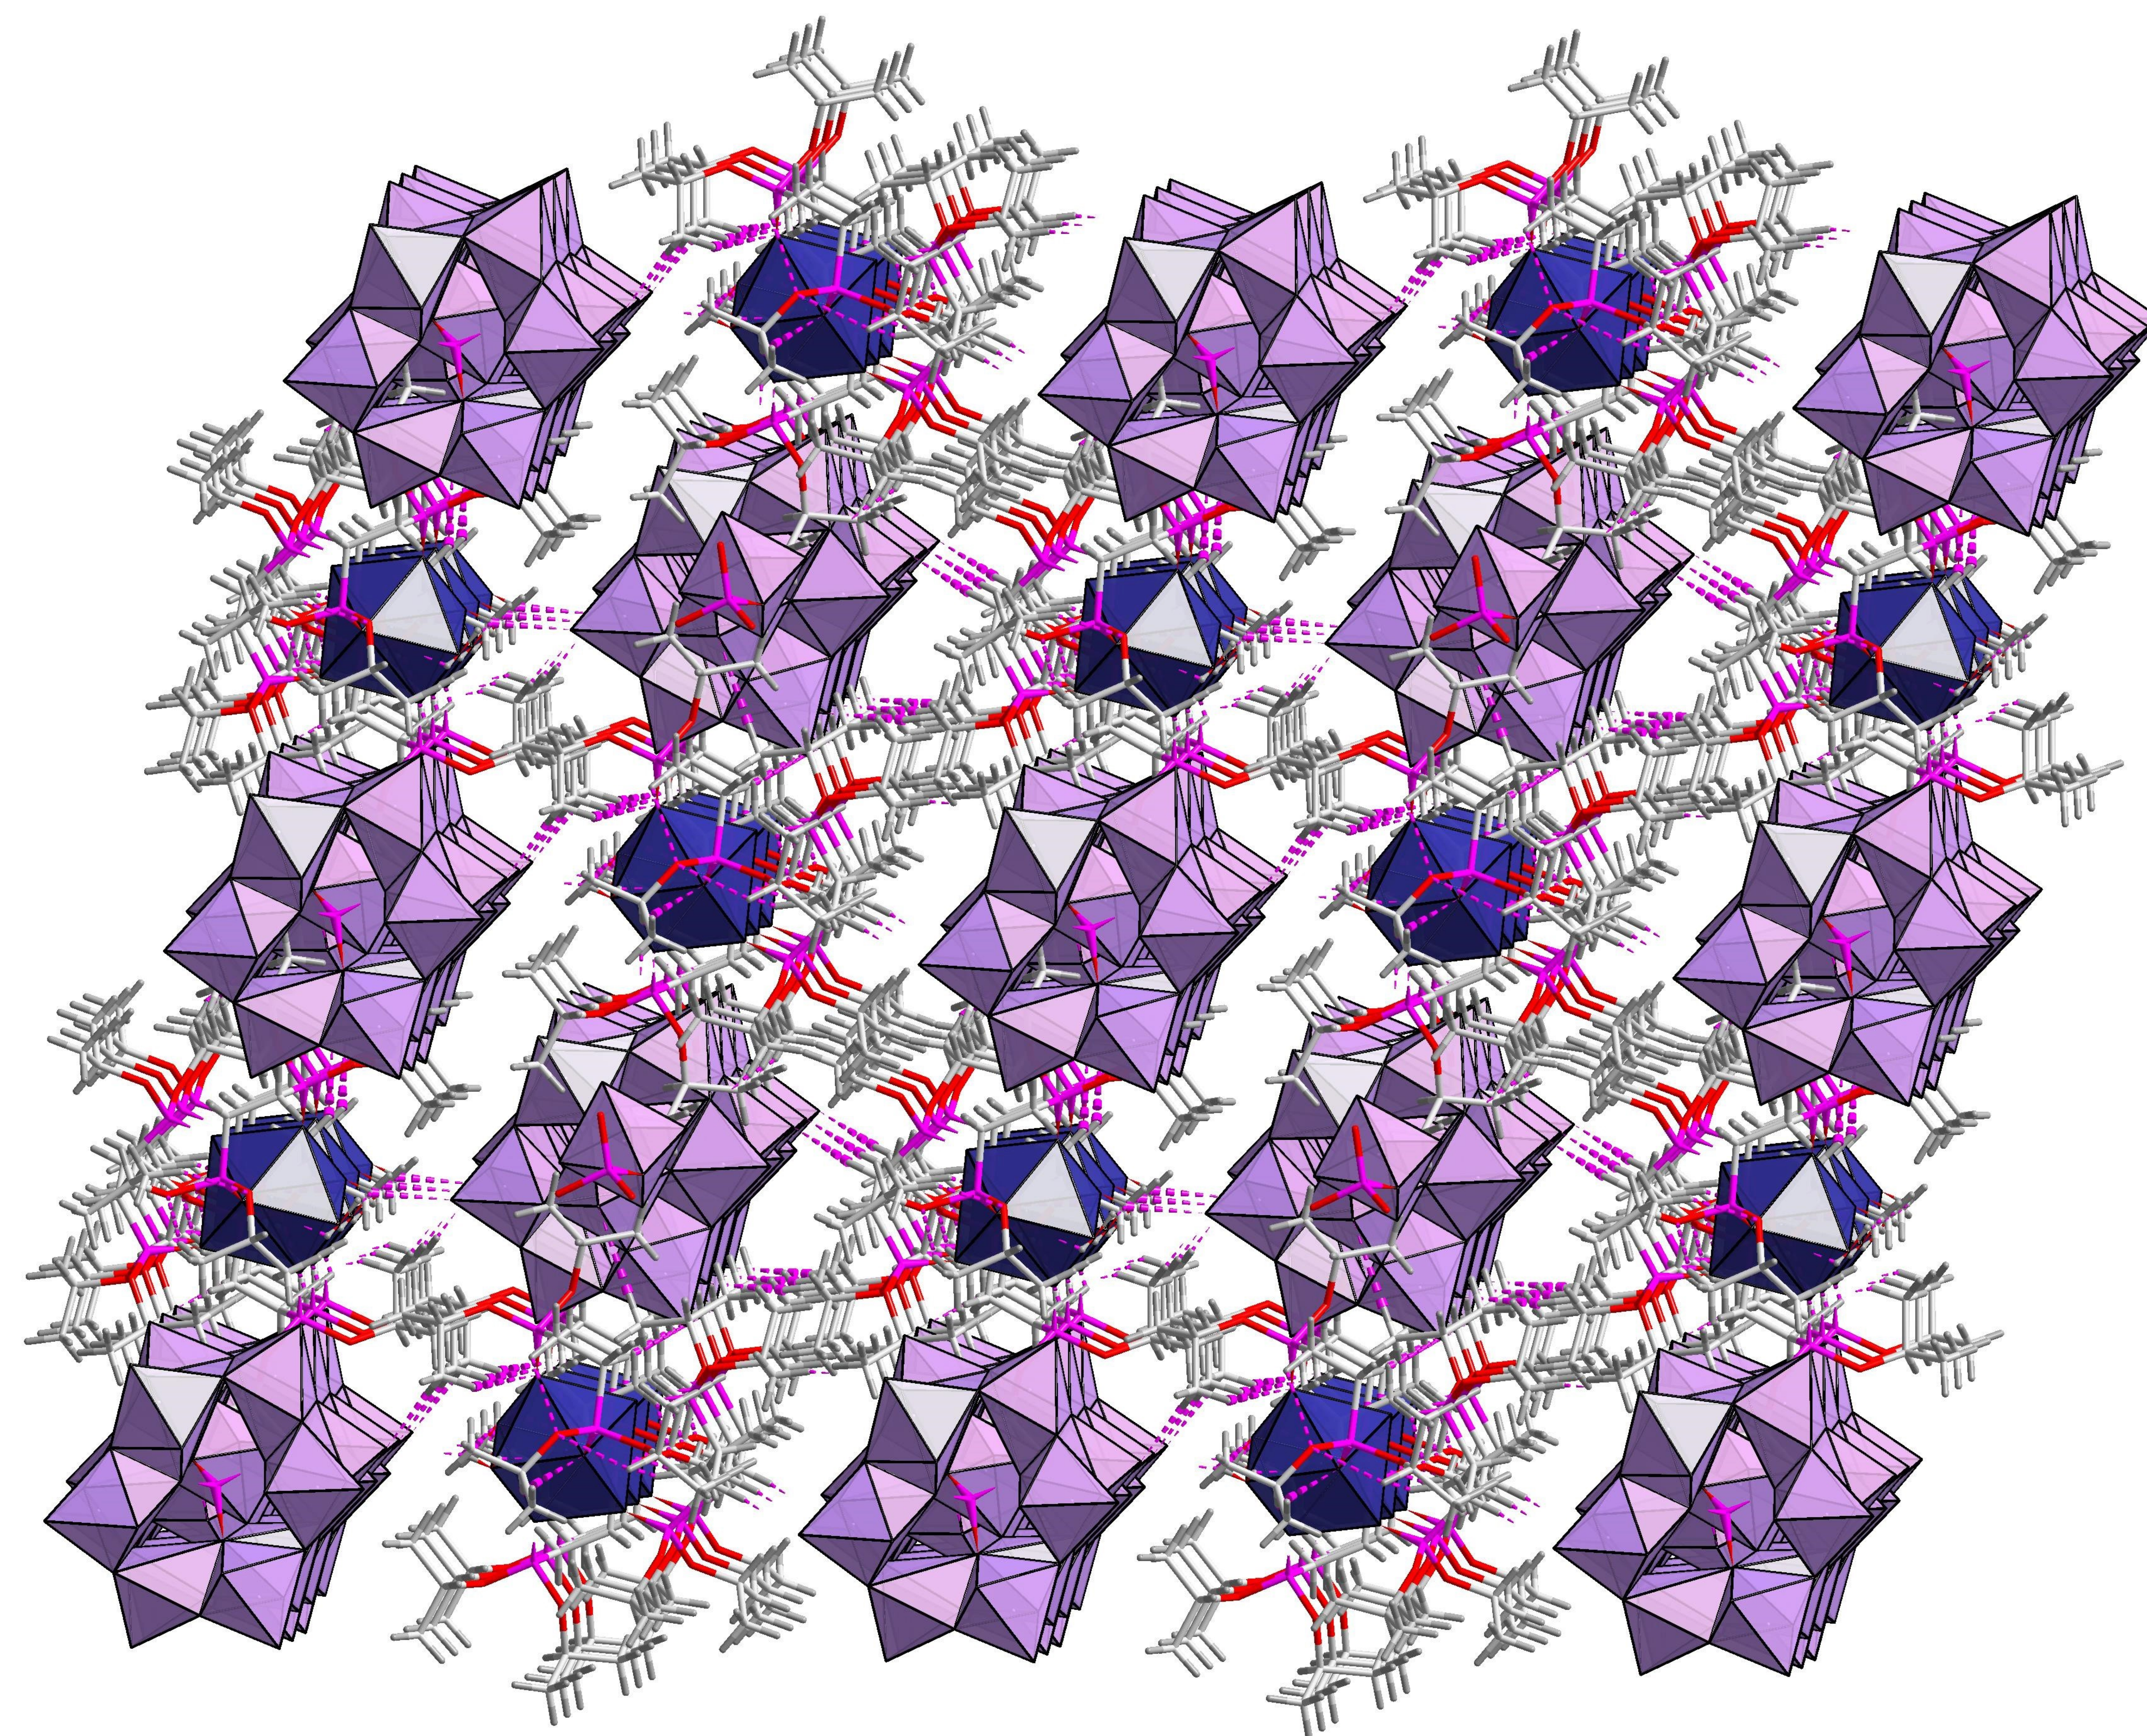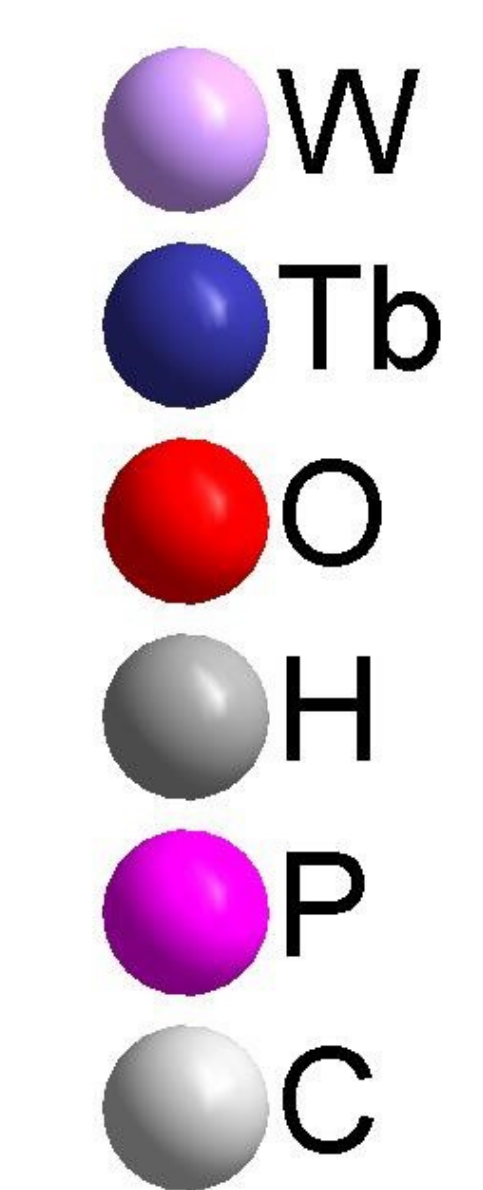

Supplement: d4ce00851k16.pdf [file d4ce00851k16.pdf]

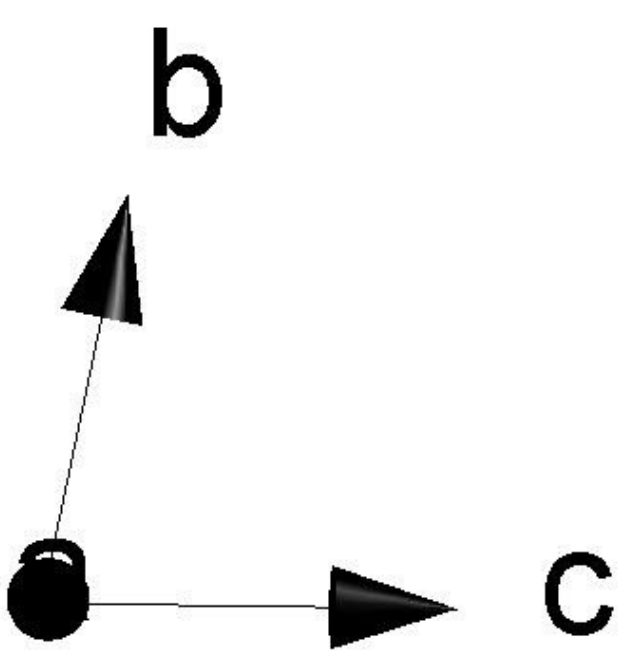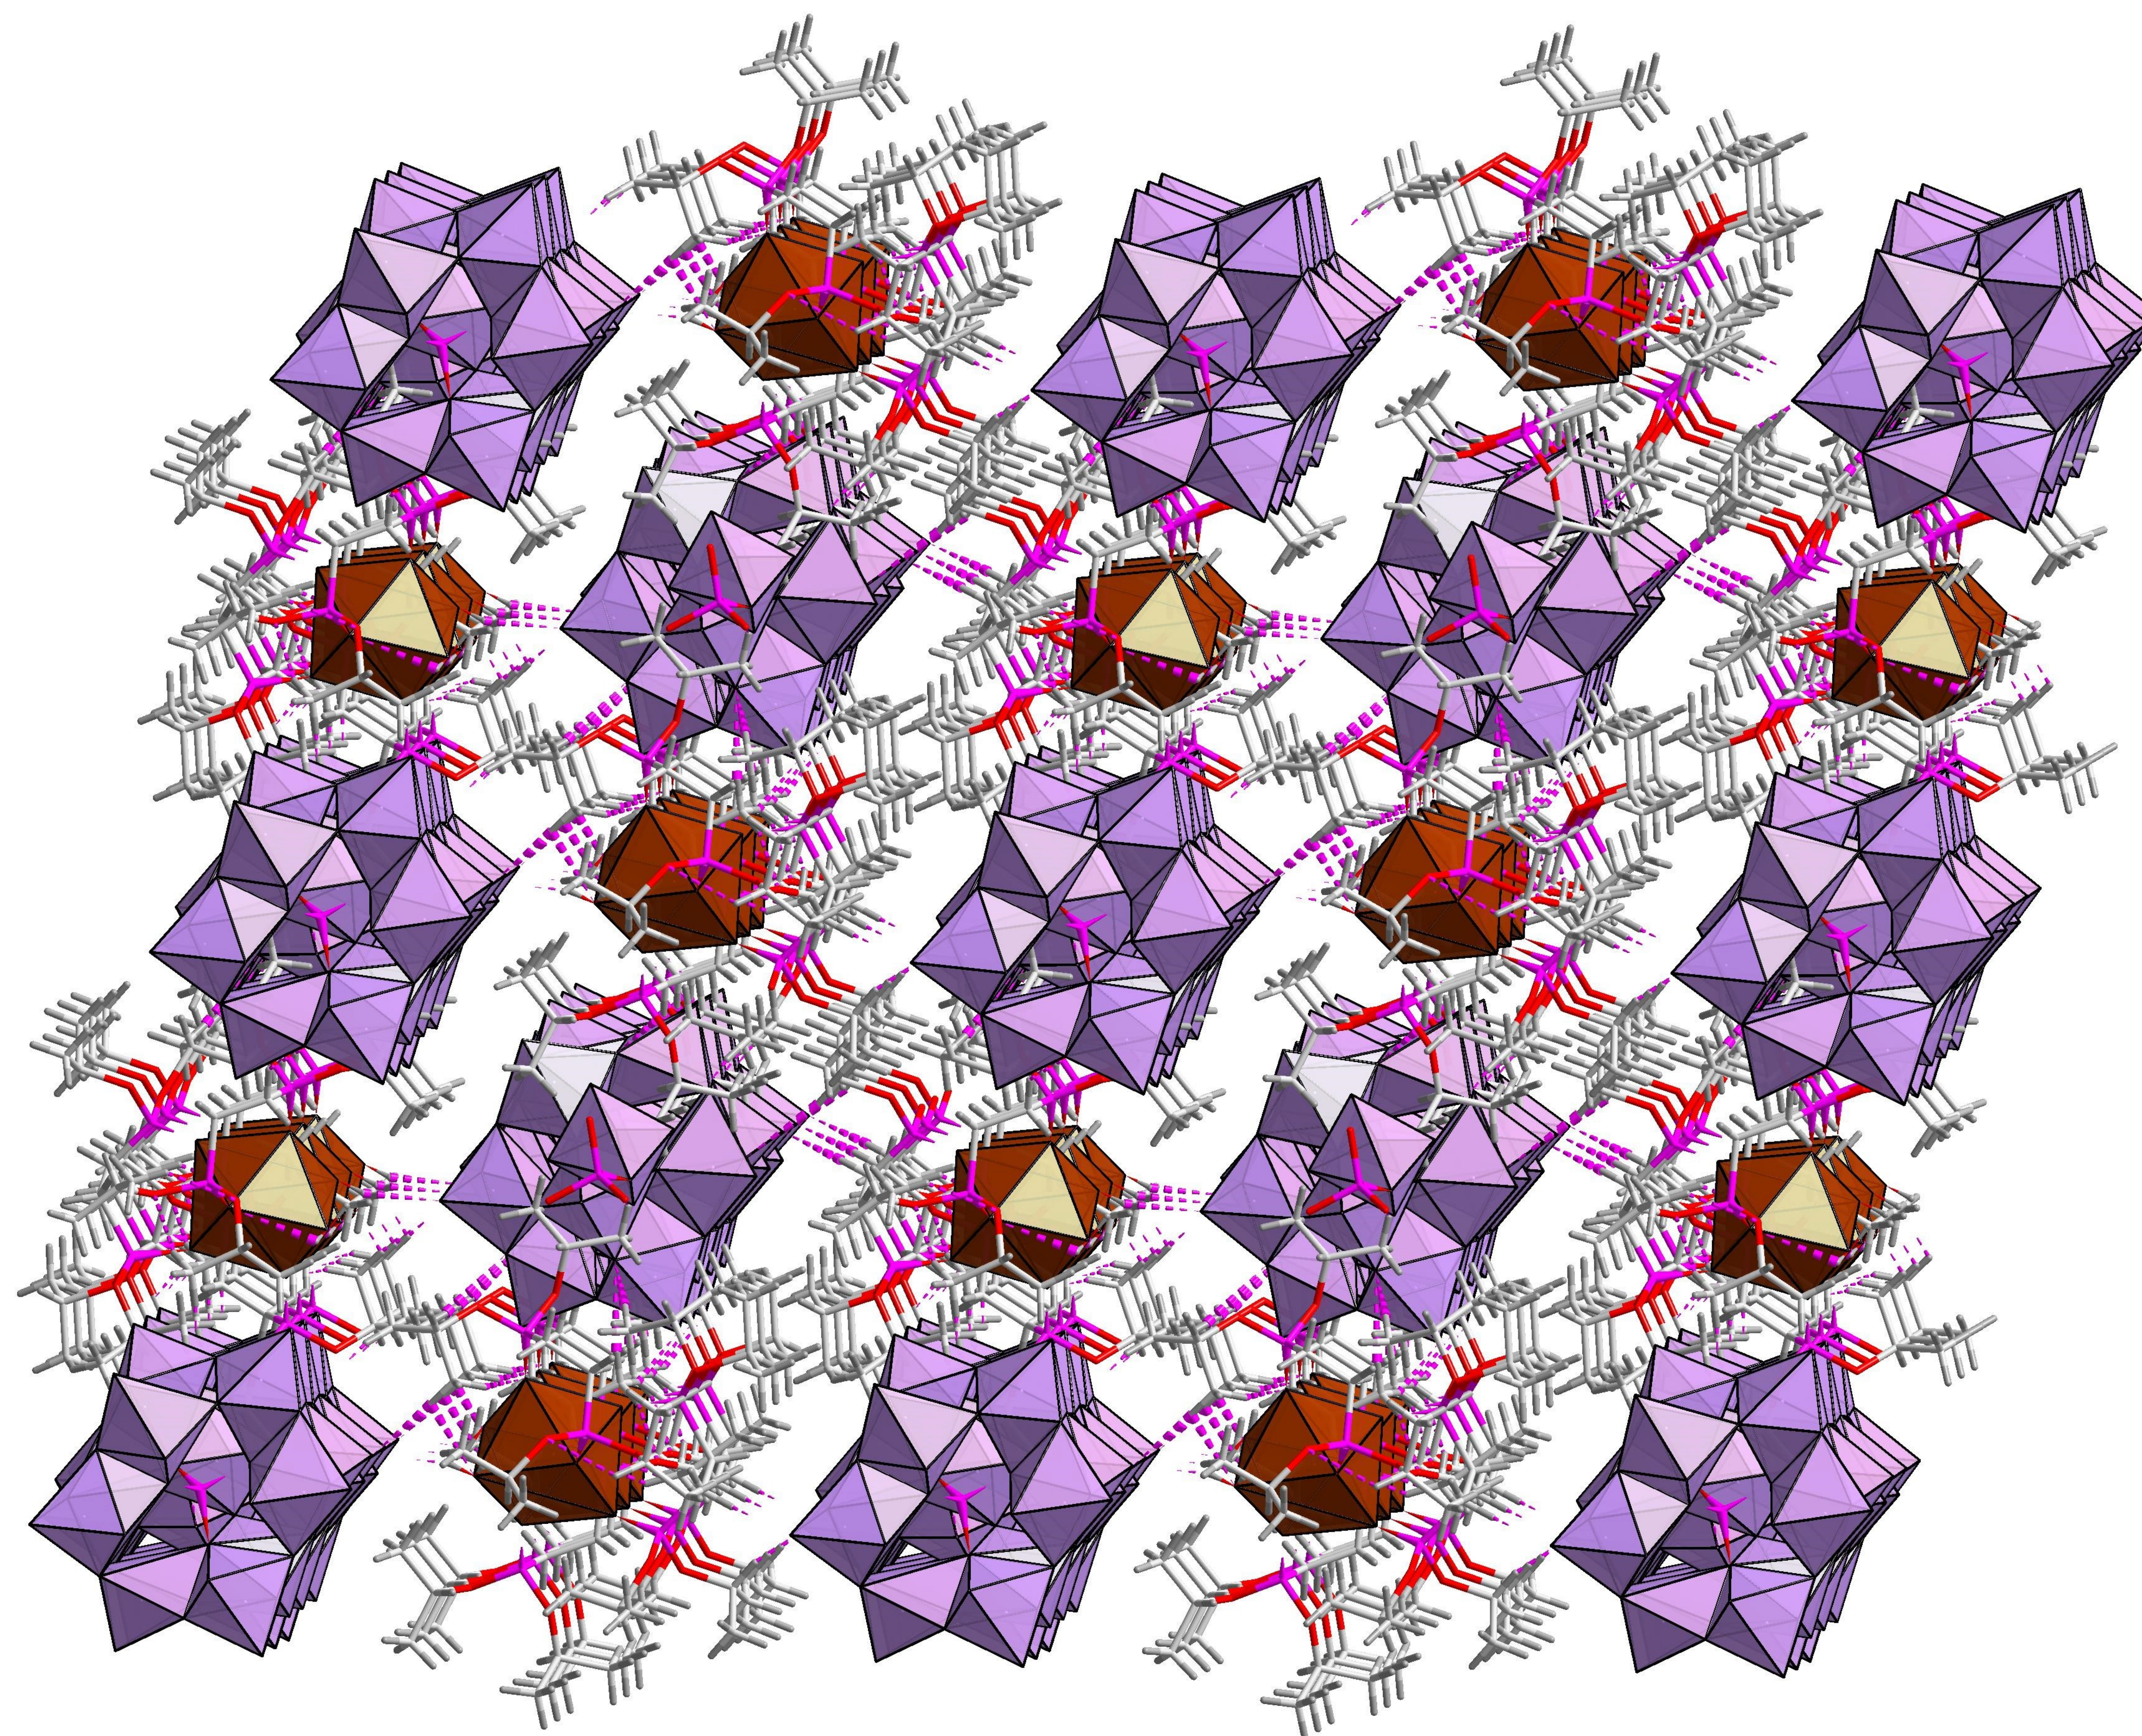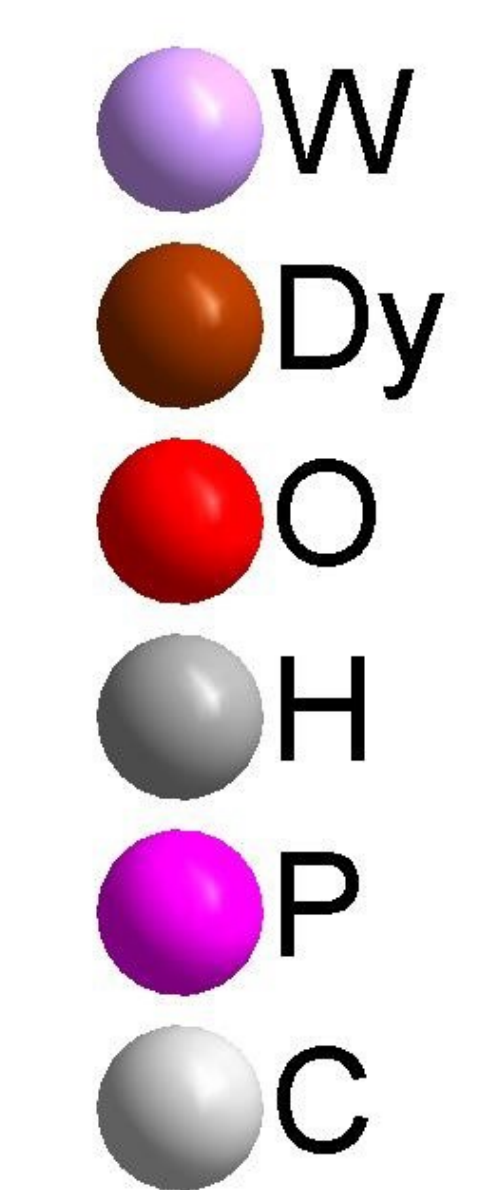

Supplement: d4ce00851k17.pdf [file d4ce00851k17.pdf]

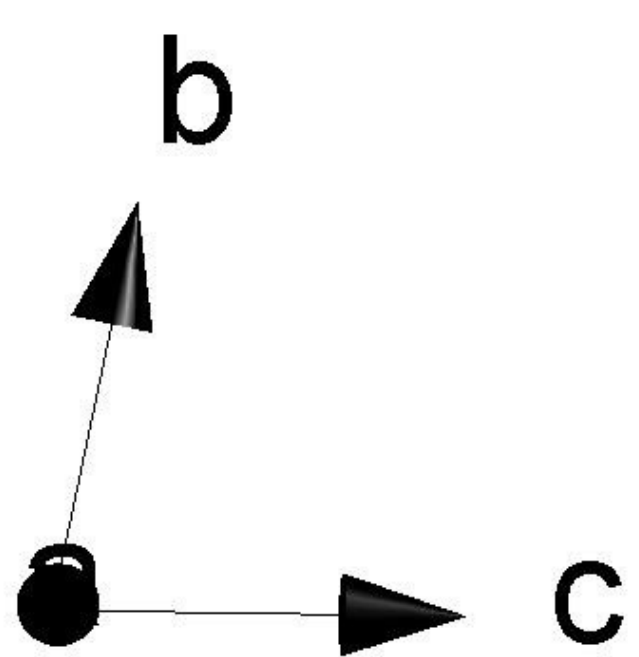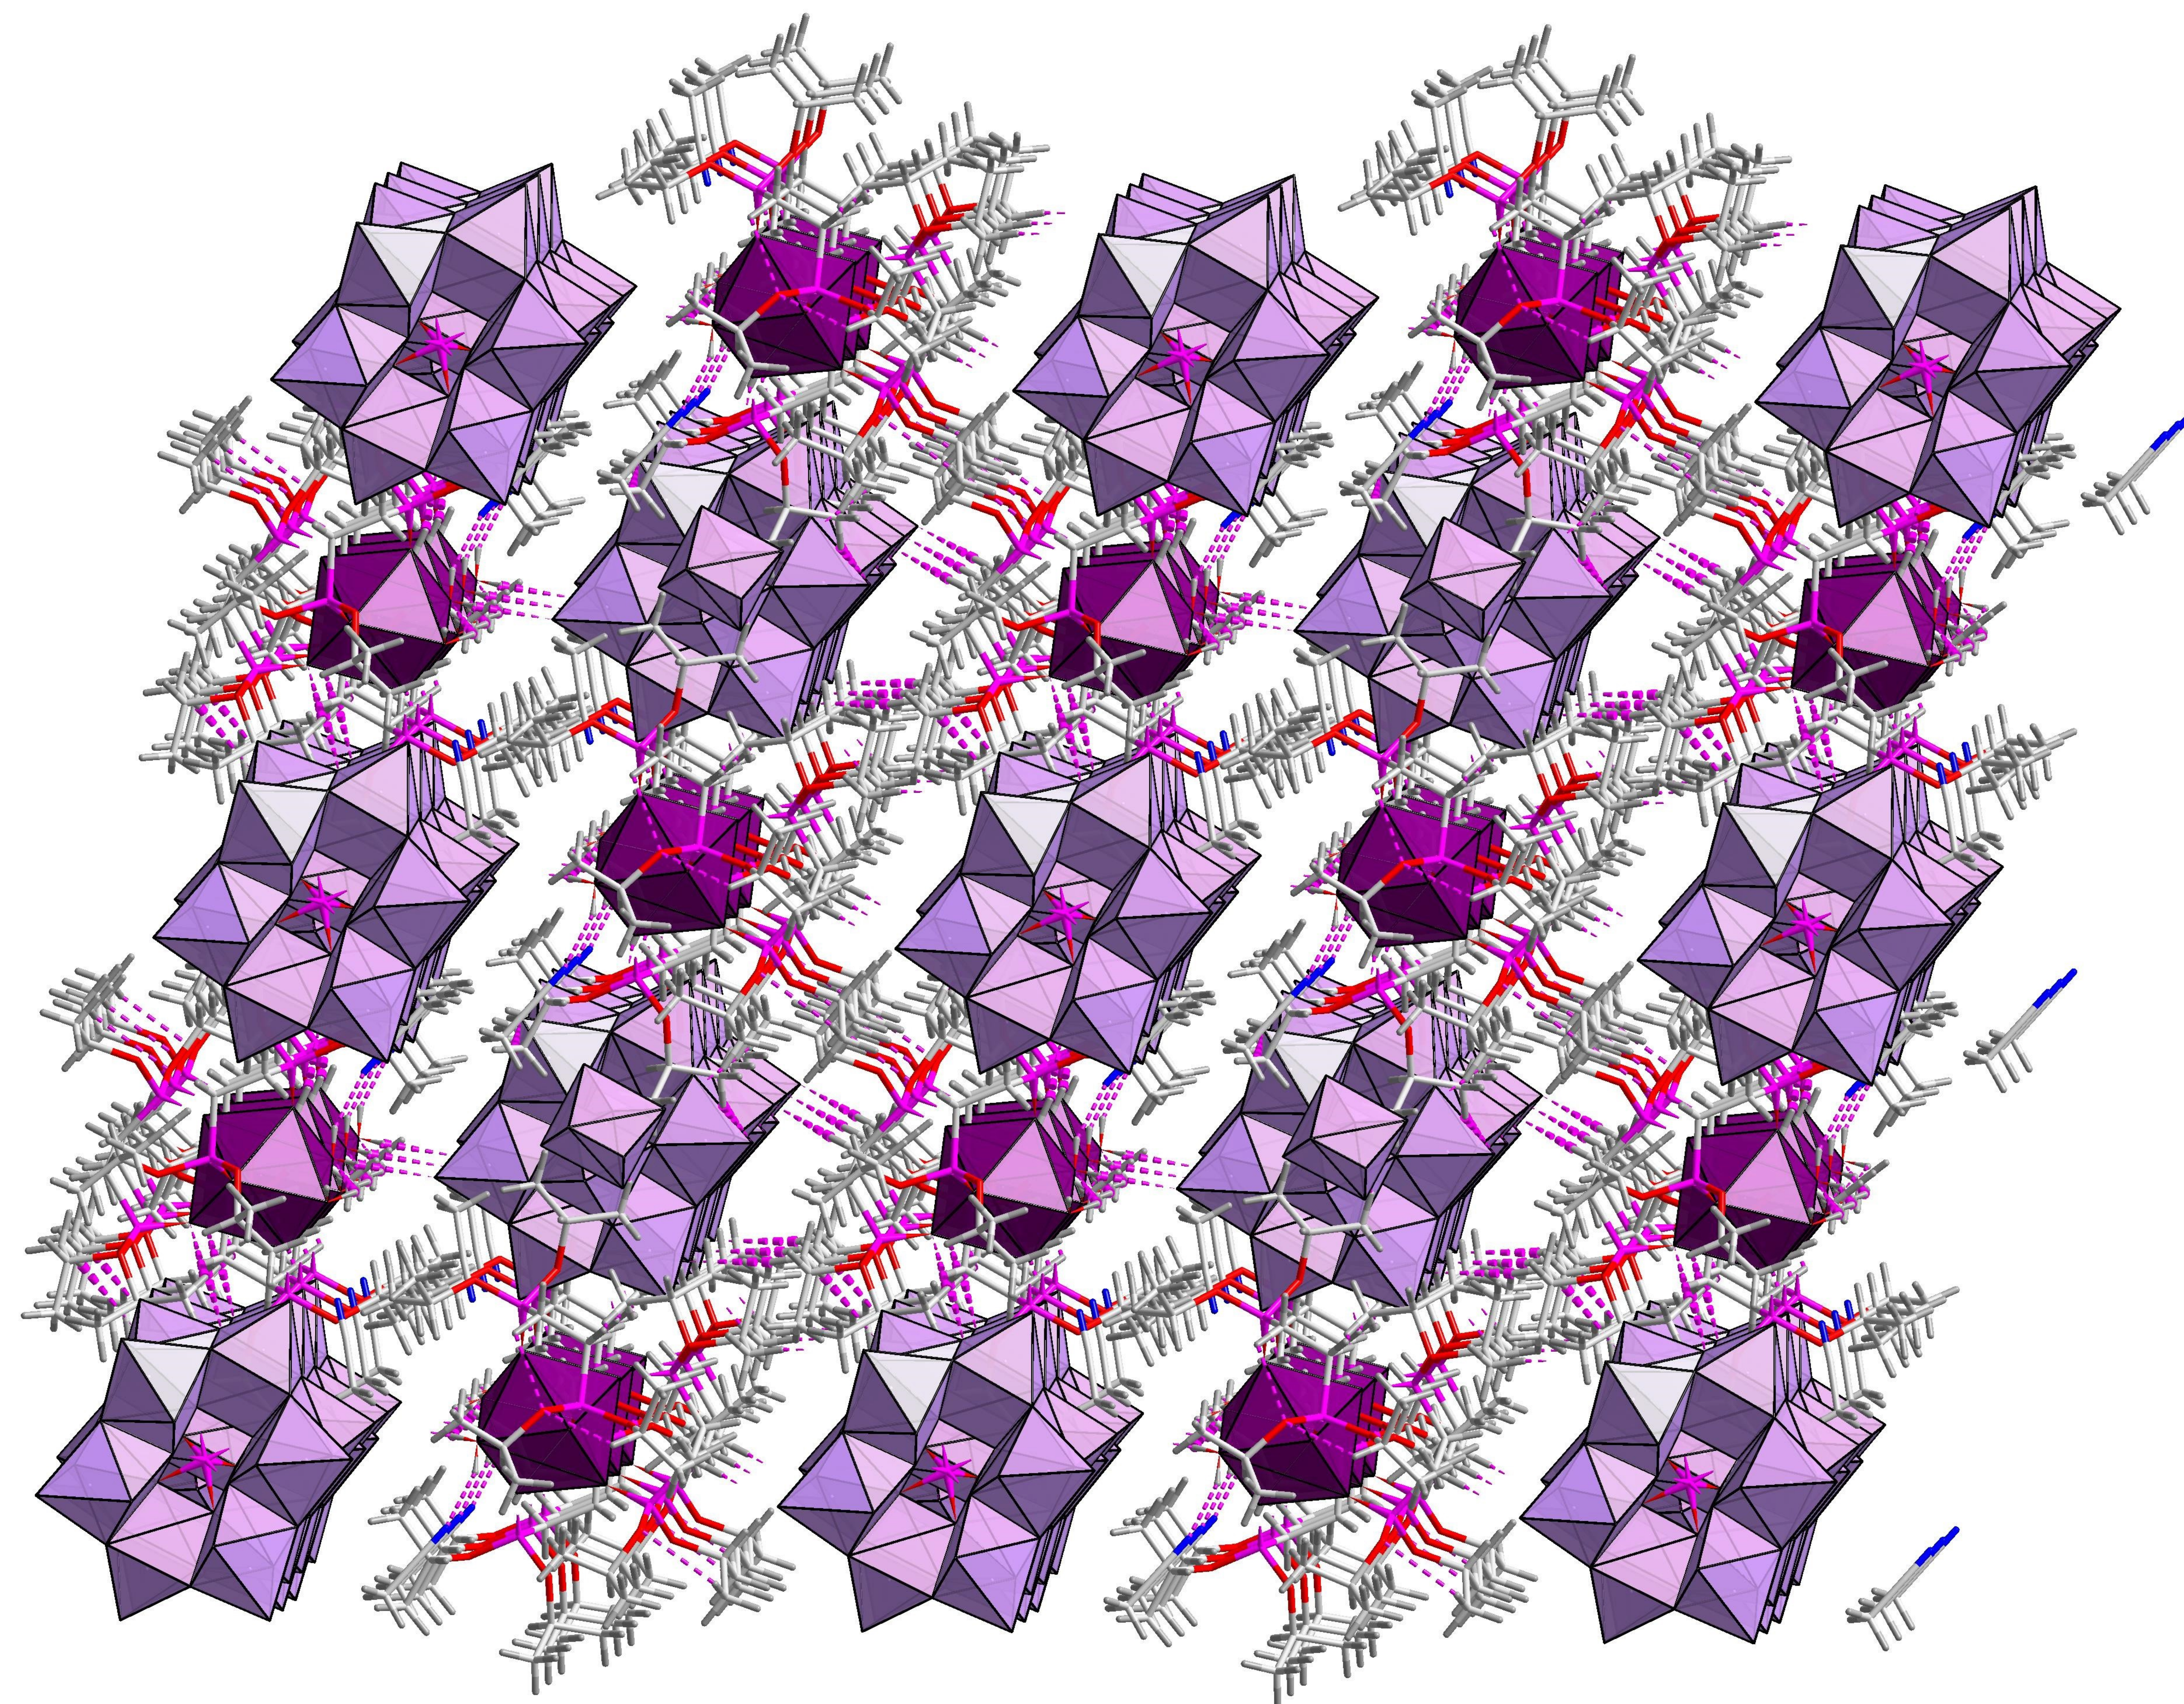

- W
- P
- O
- H<sub>0</sub>
- H
- C
- N

Supplement: d4ce00851k18.pdf [file d4ce00851k18.pdf]

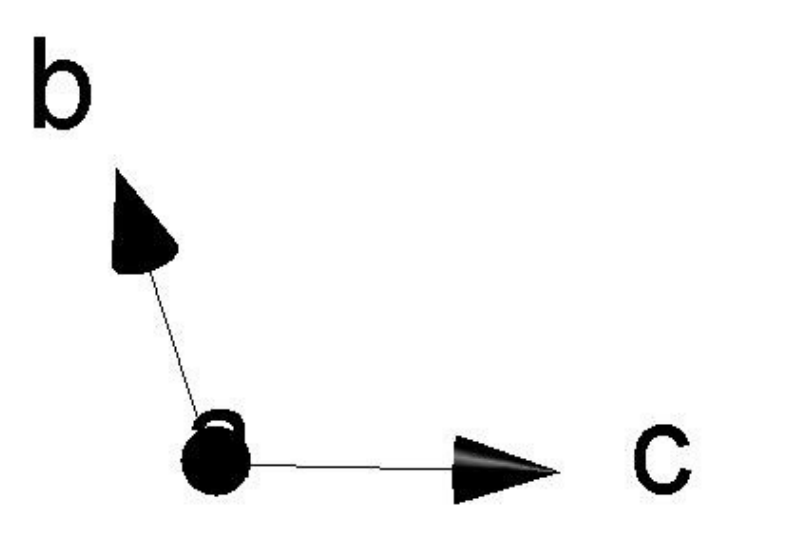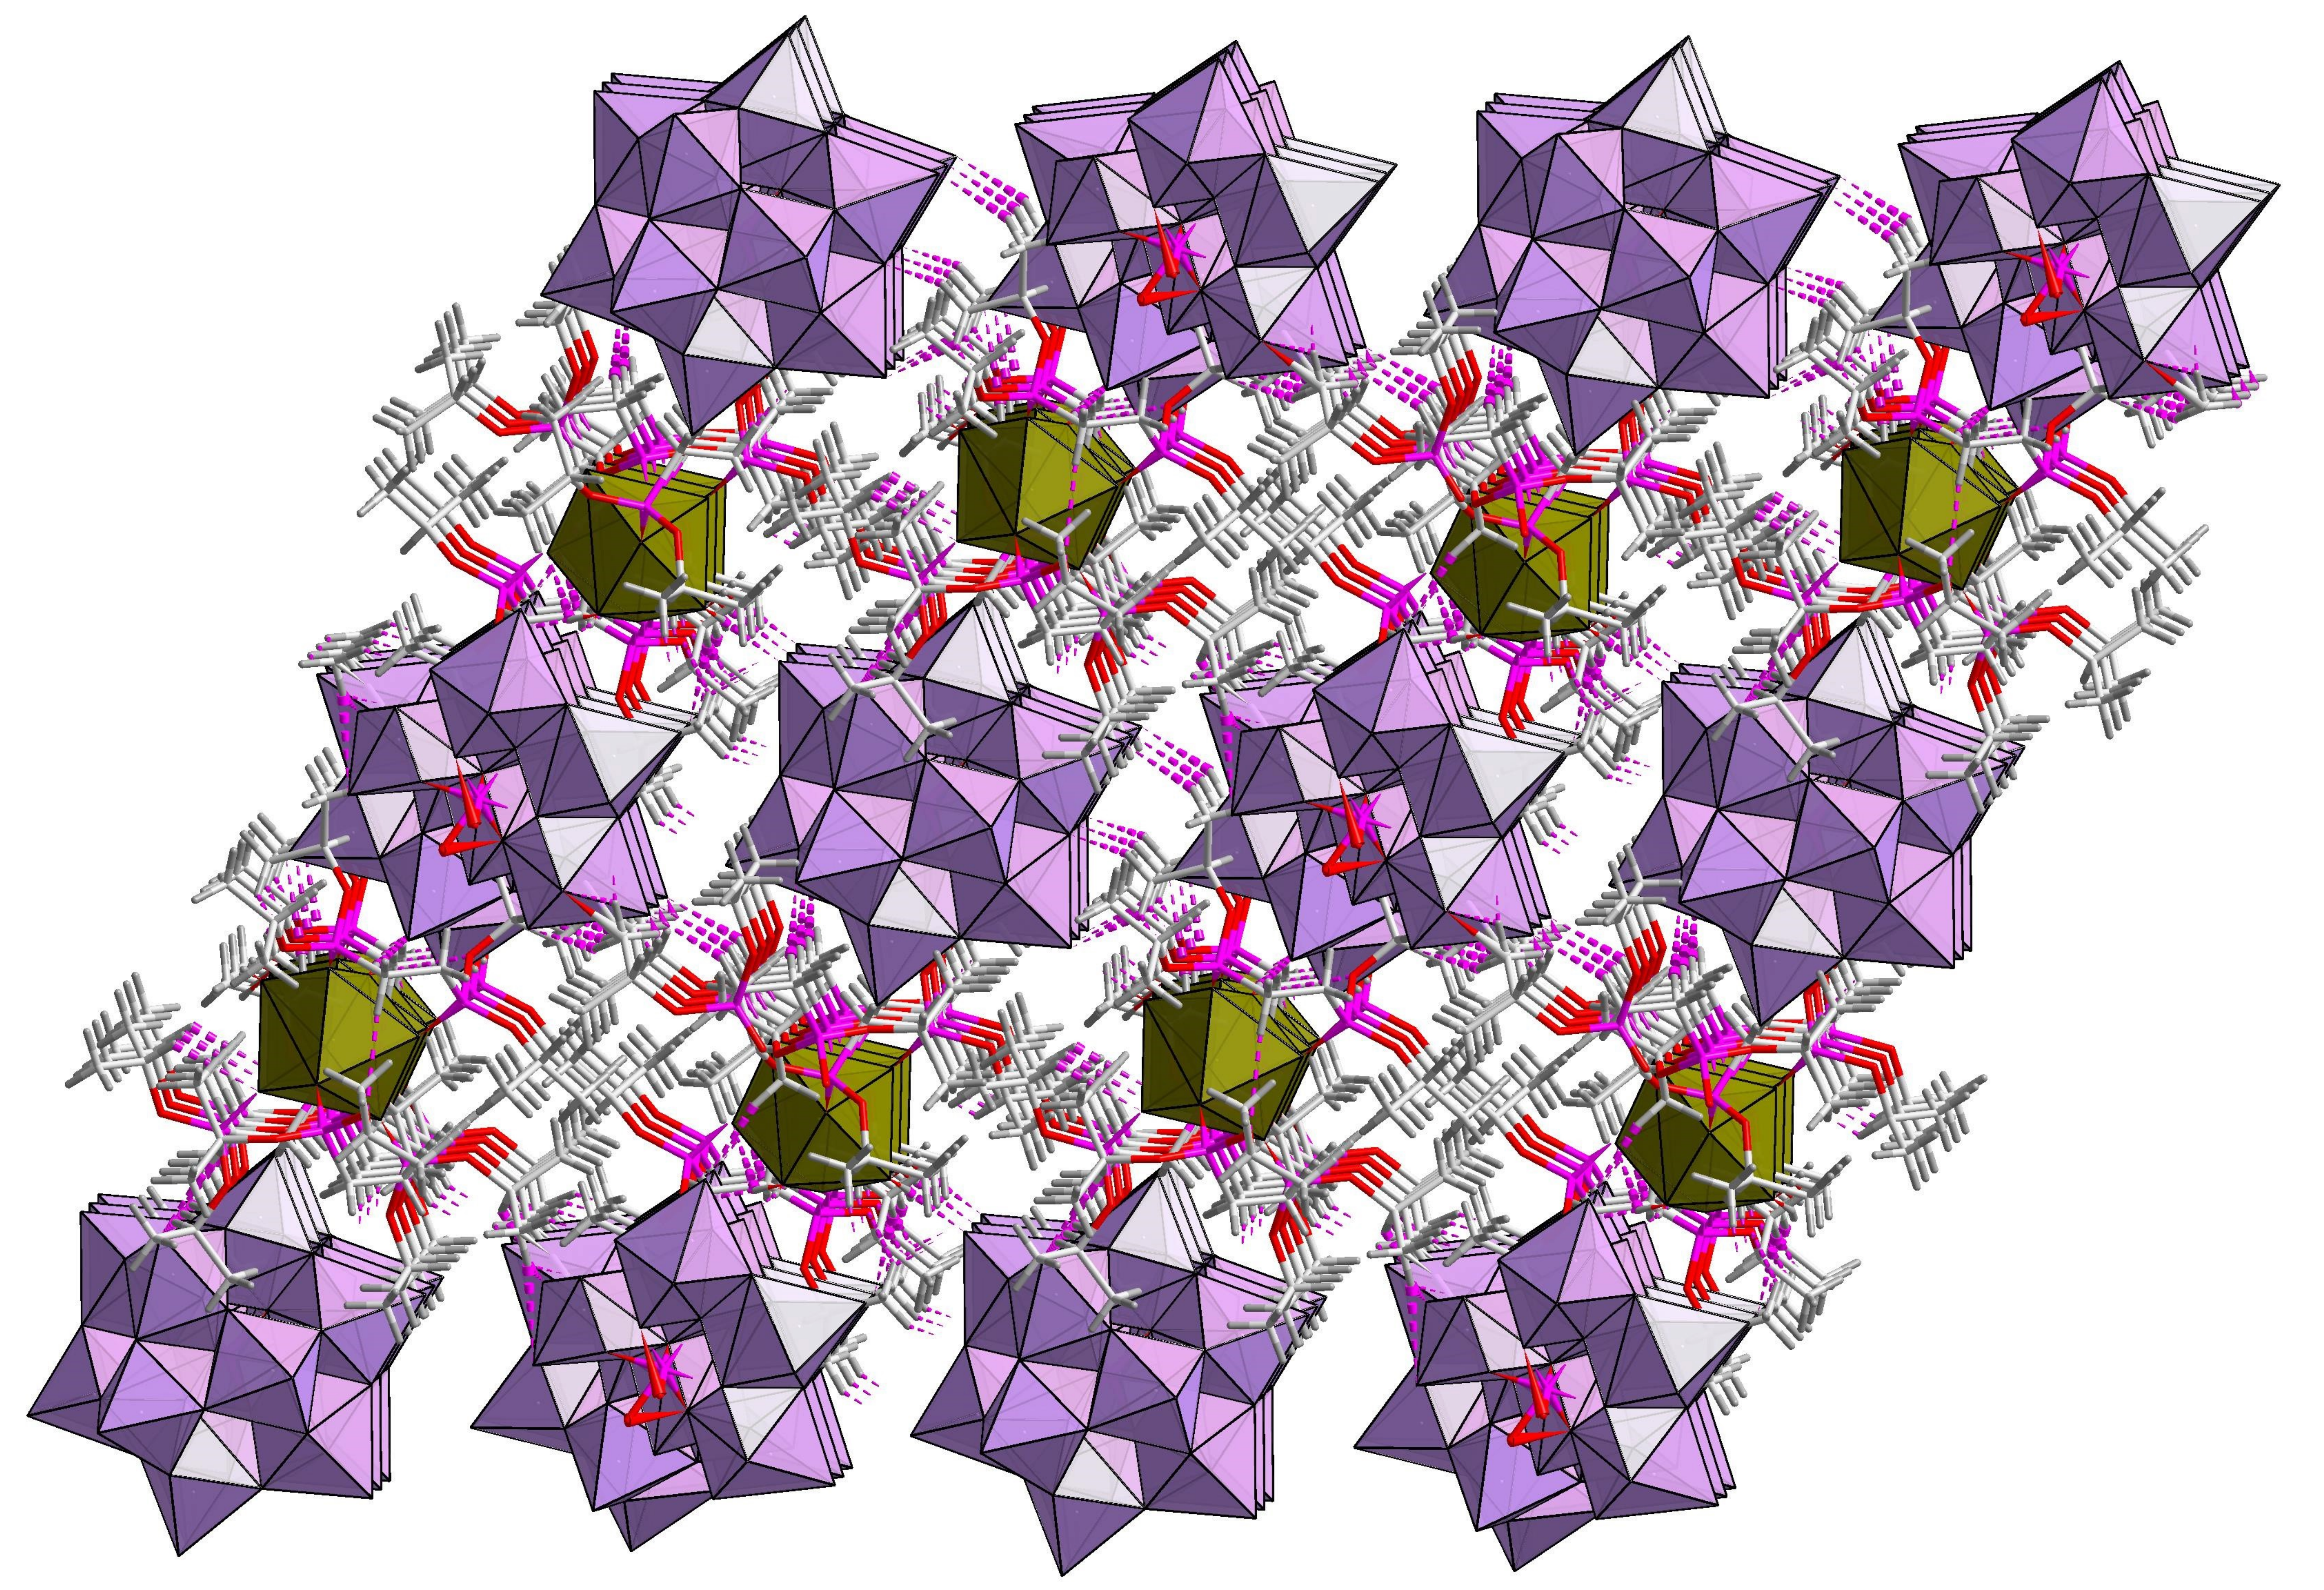

-  Er
-  W
-  O
-  H
-  P
-  C

Supplement: d4ce00851k19.pdf [file d4ce00851k19.pdf]

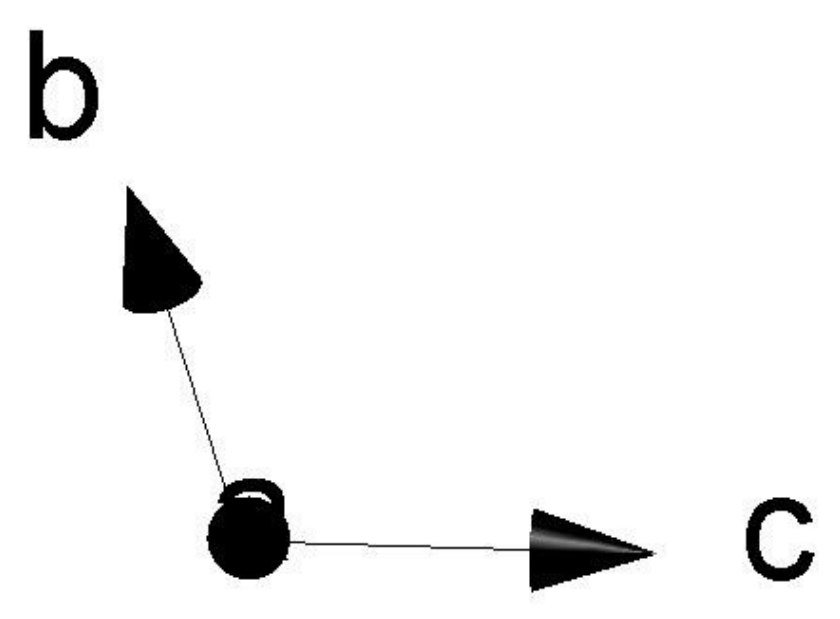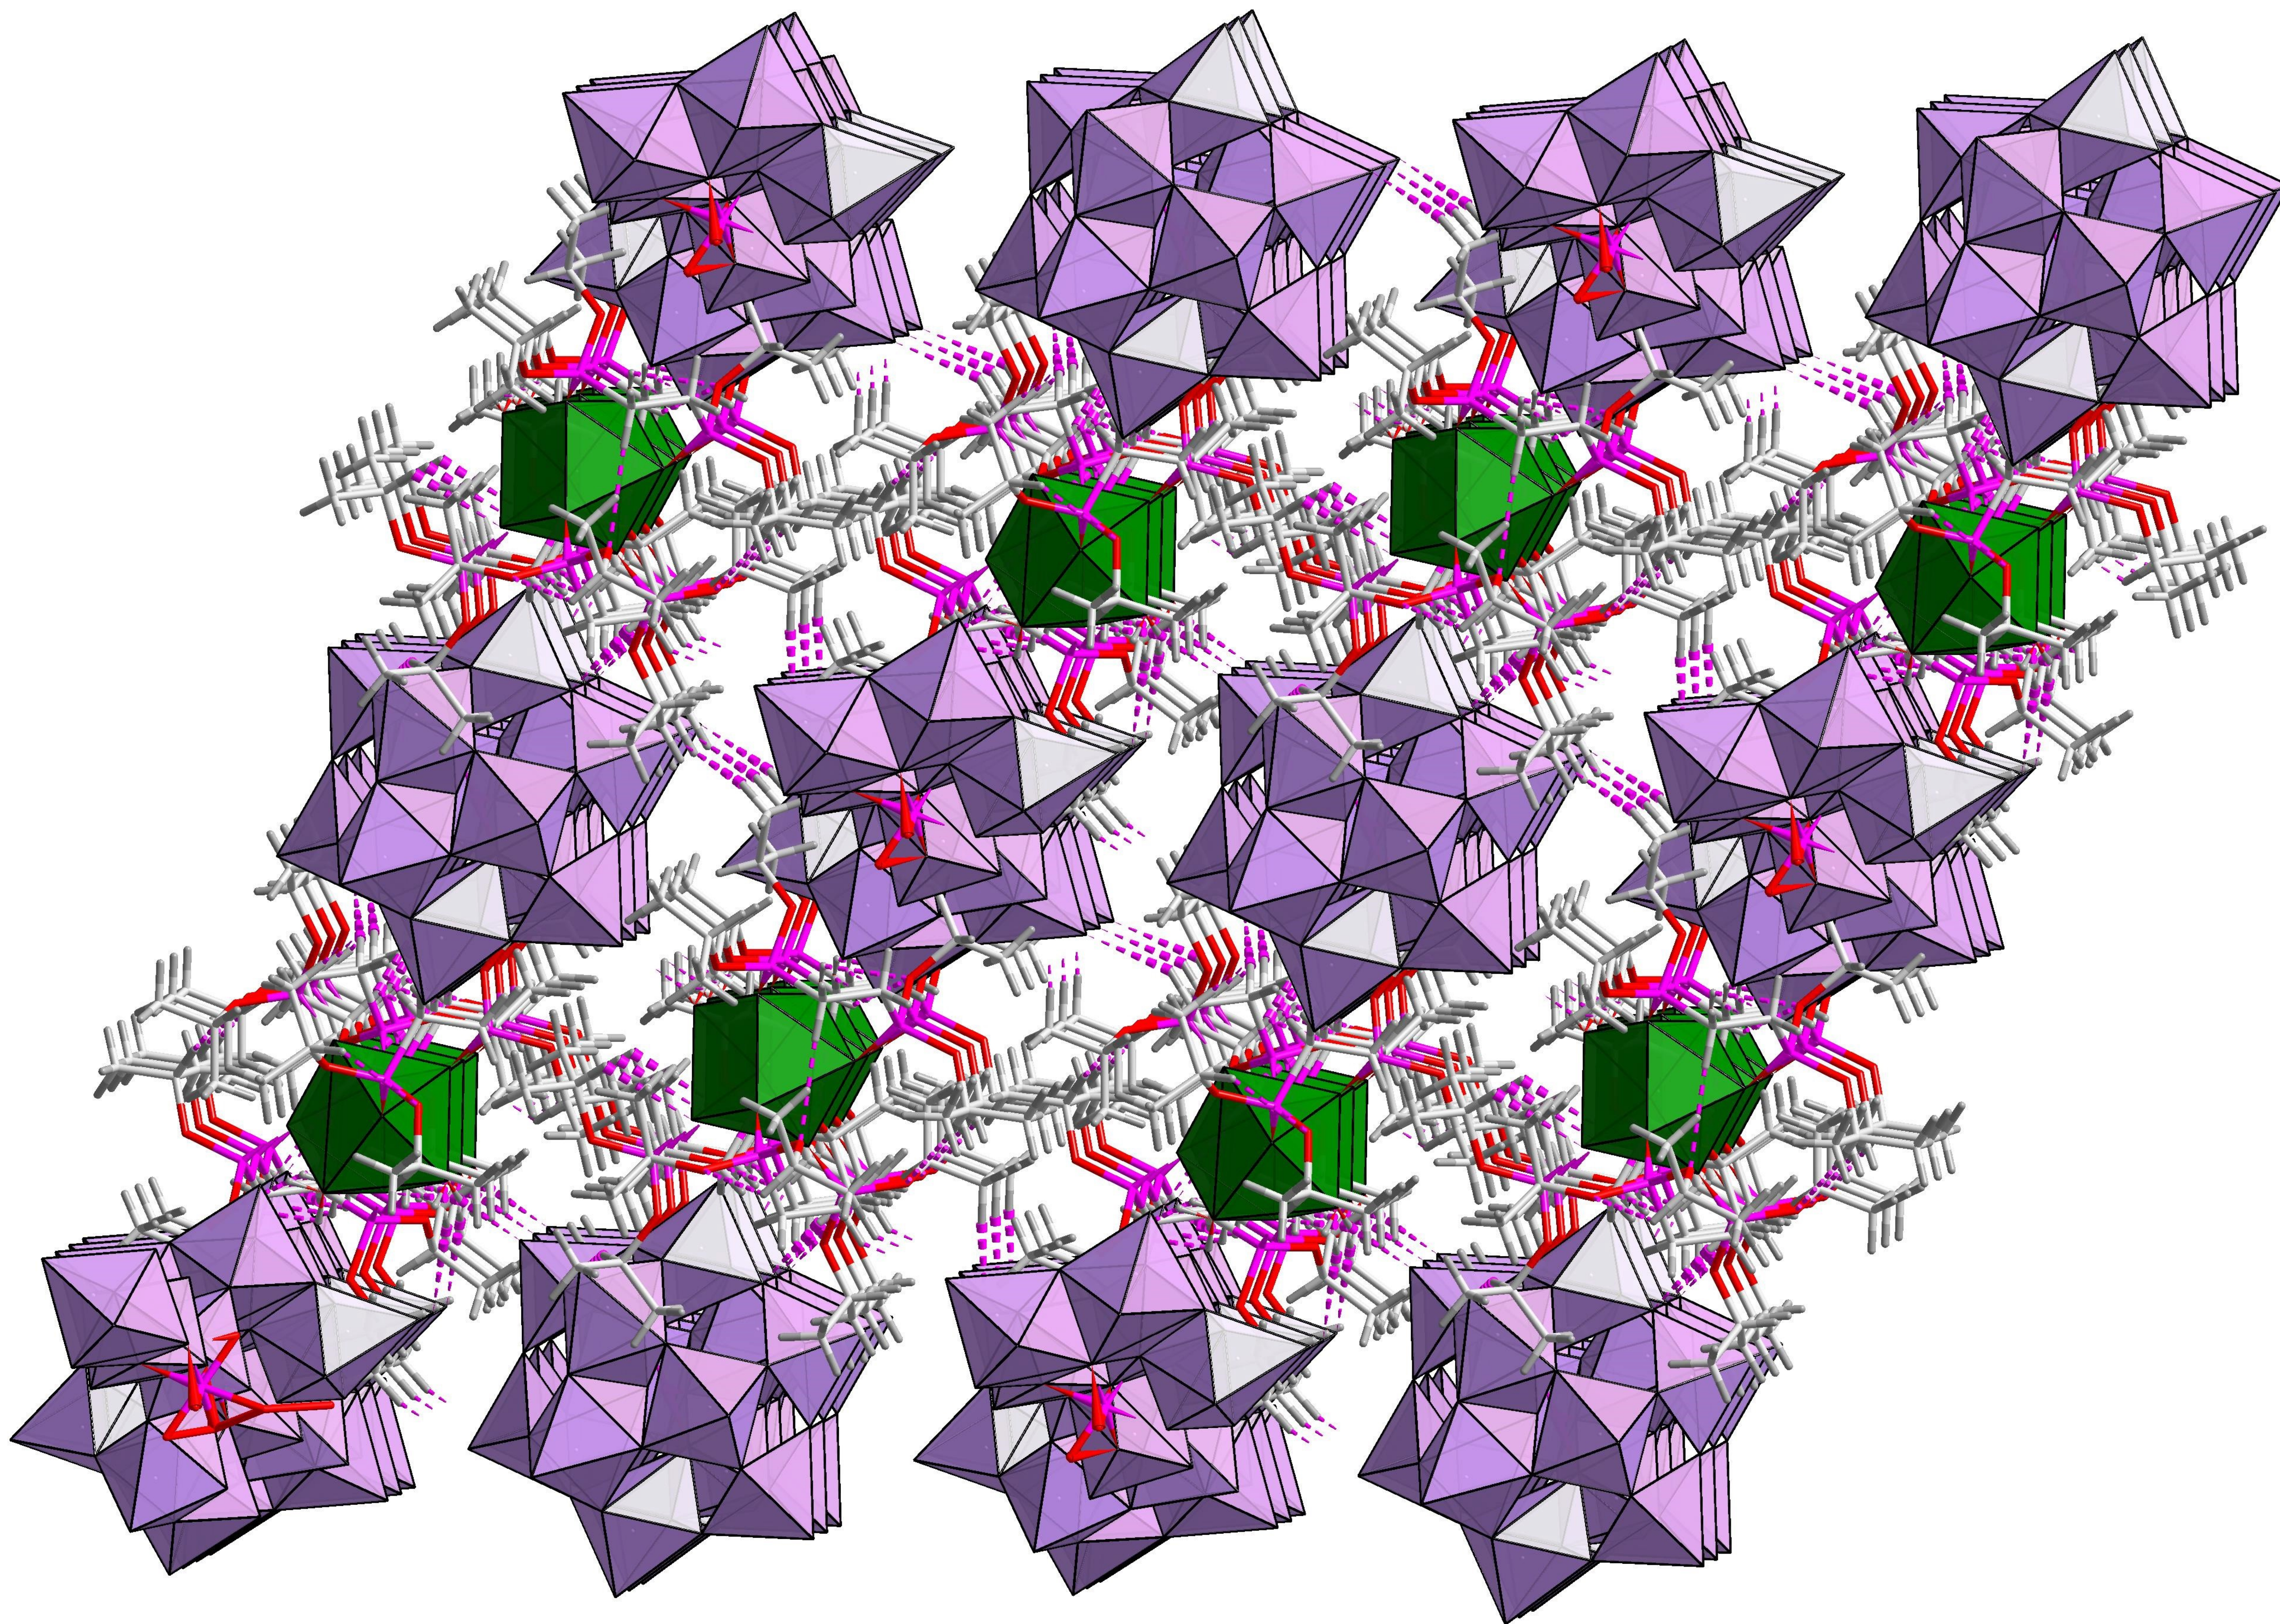

- W
- P
- O
- Tm
- H
- C
- N

Supplement: d4ce00851k2.pdf [file d4ce00851k2.pdf]

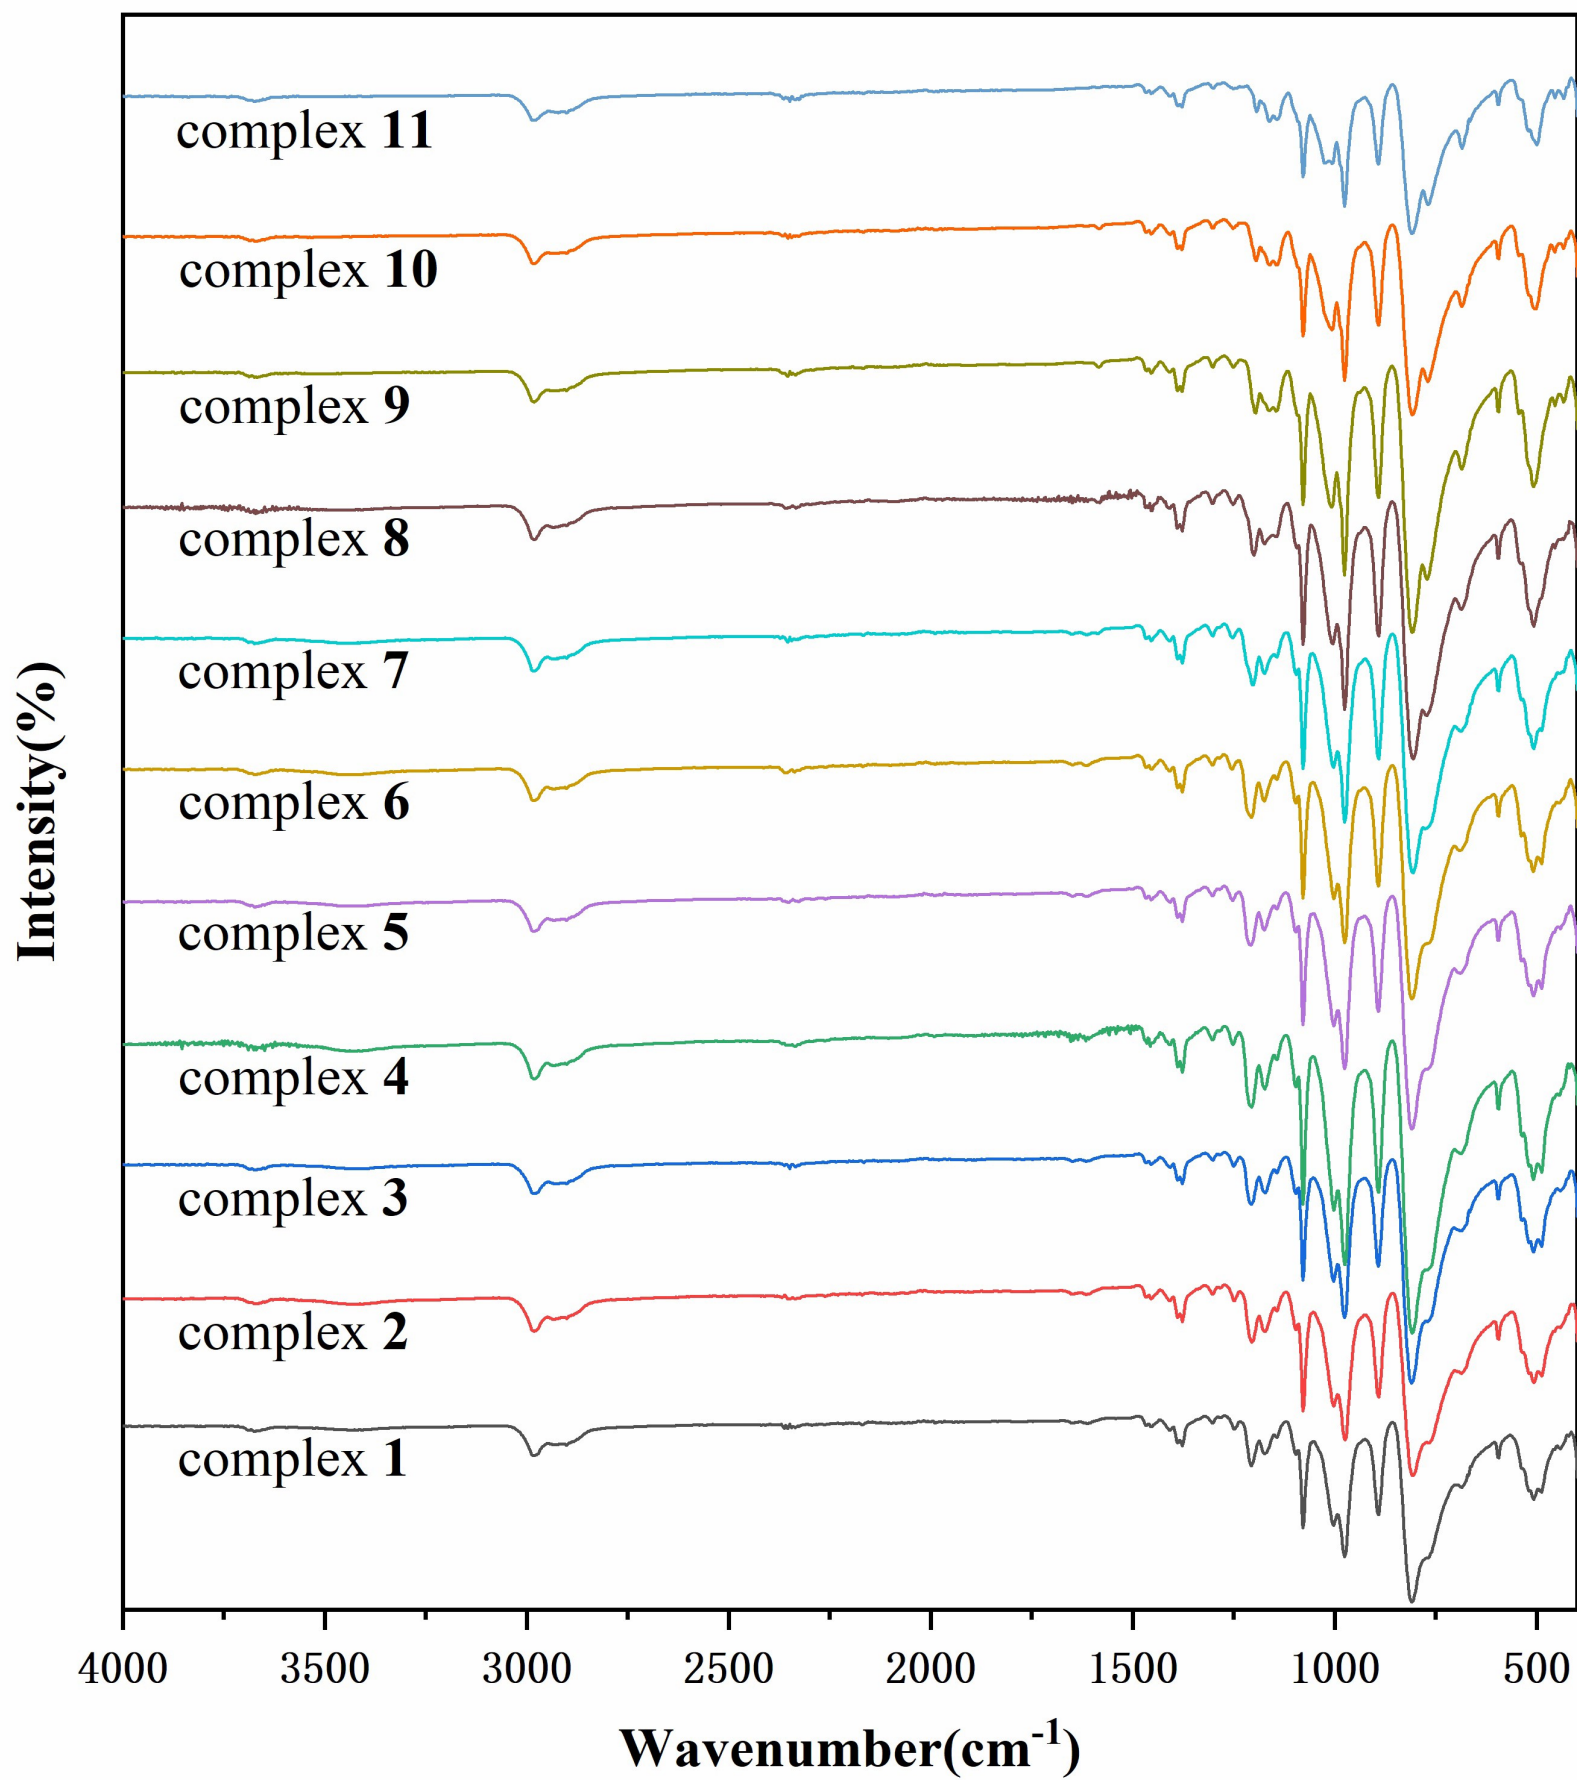

Supplement: d4ce00851k3.pdf [file d4ce00851k3.pdf]

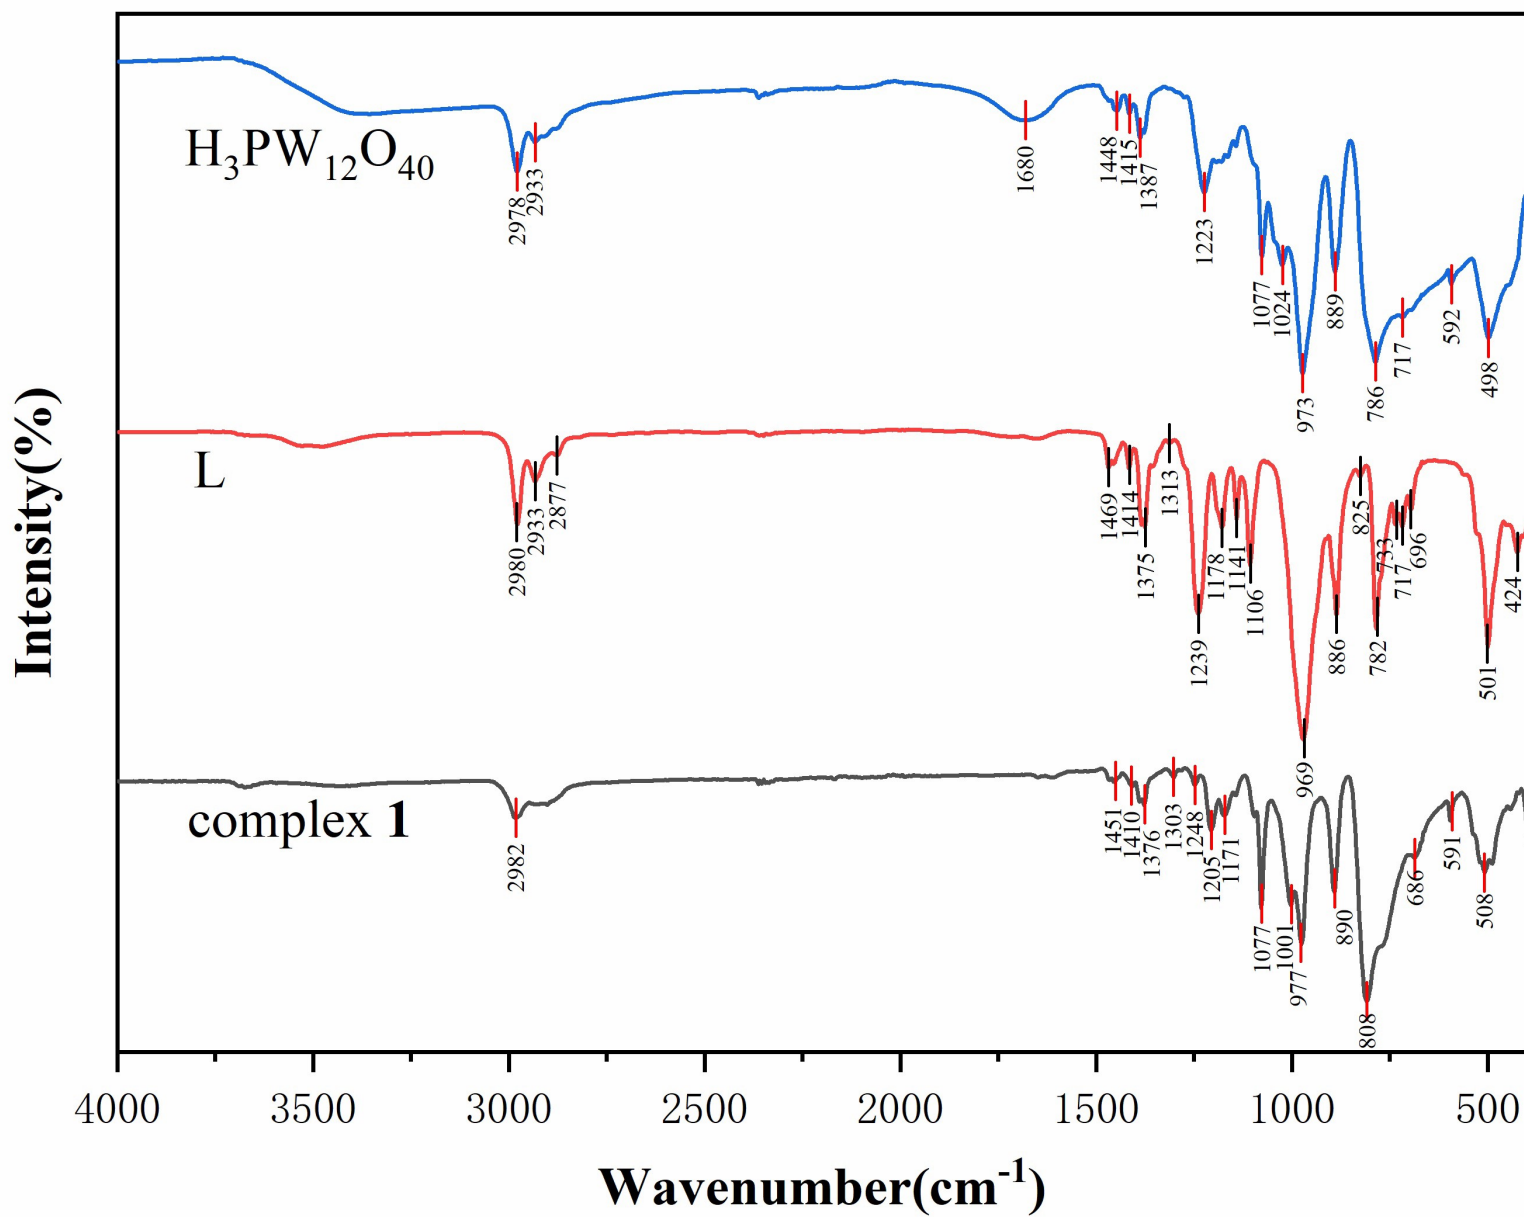

Supplement: d4ce00851k4.pdf [file d4ce00851k4.pdf]

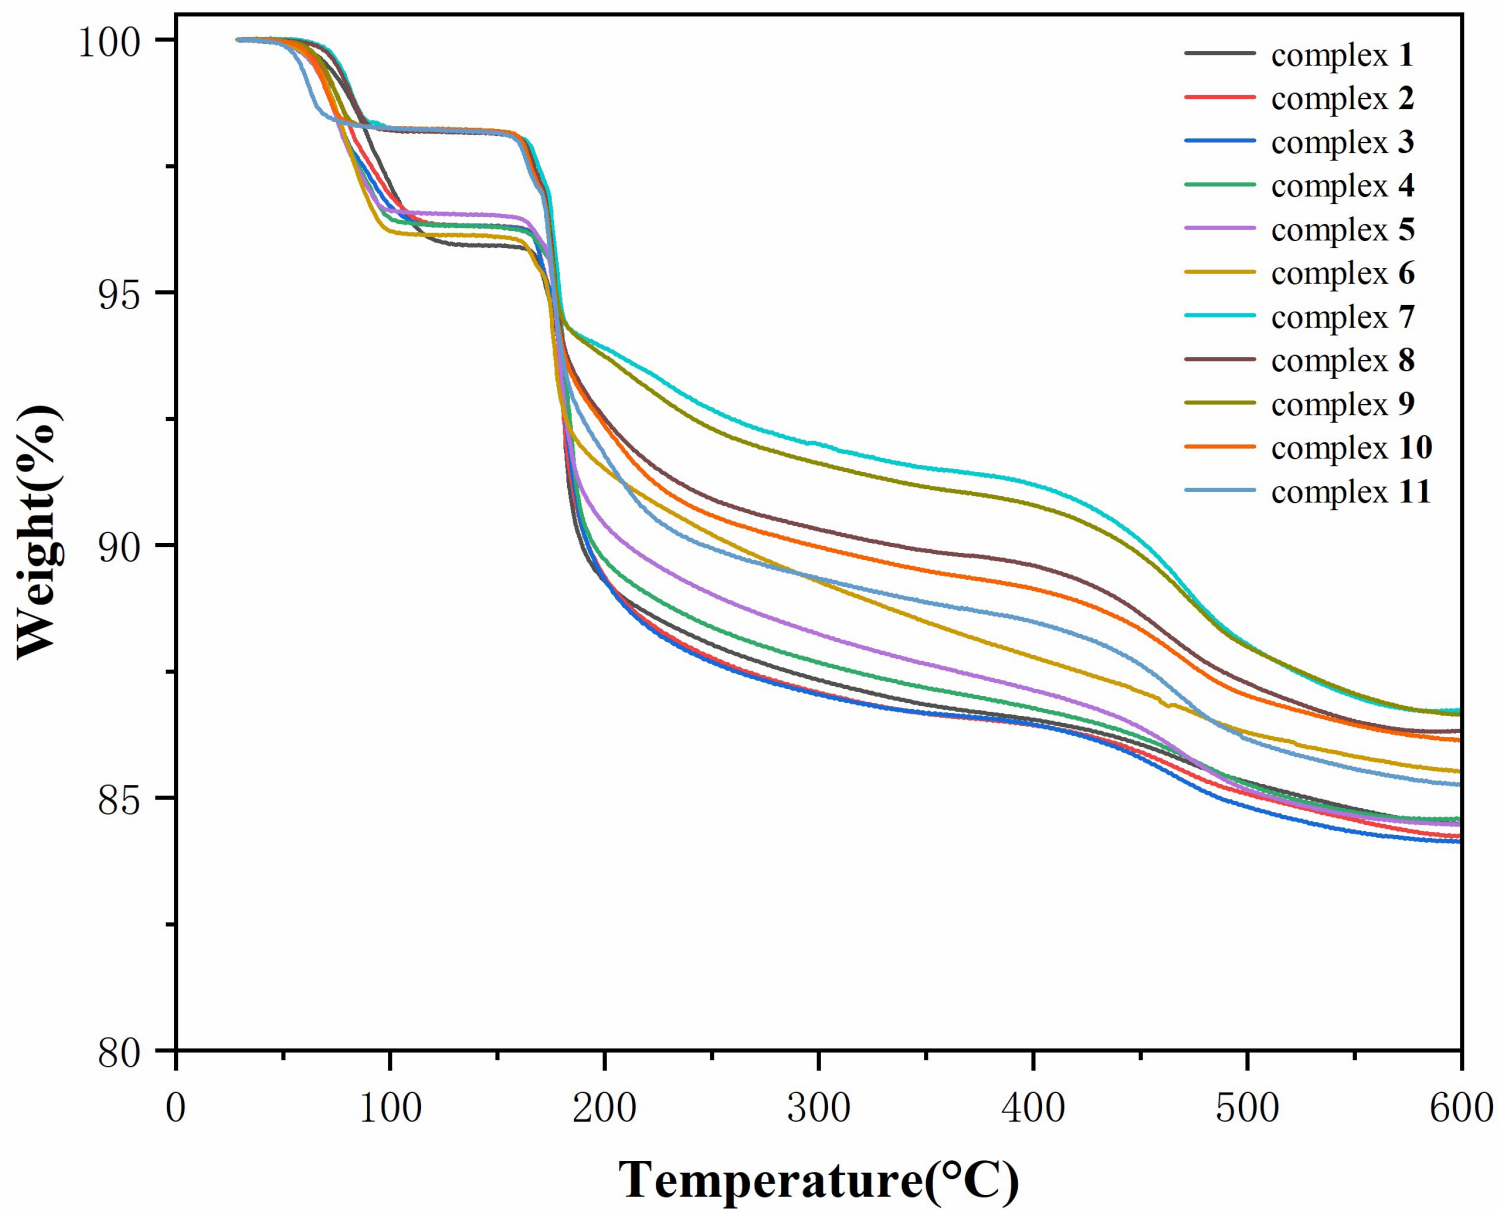

Supplement: d4ce00851k5.pdf [file d4ce00851k5.pdf]

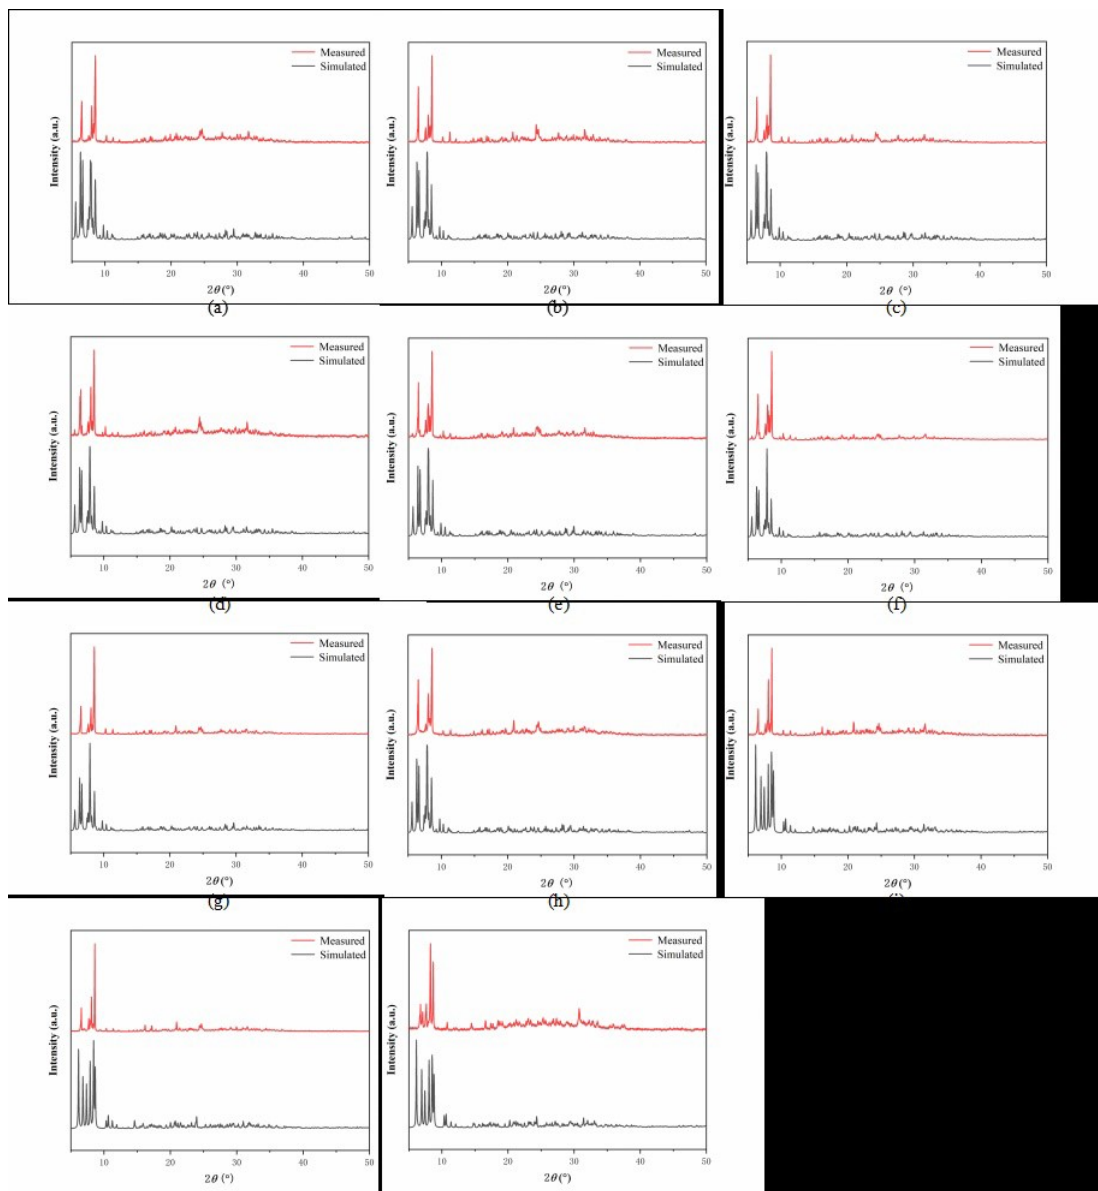

Supplement: d4ce00851k6.pdf [file d4ce00851k6.pdf]

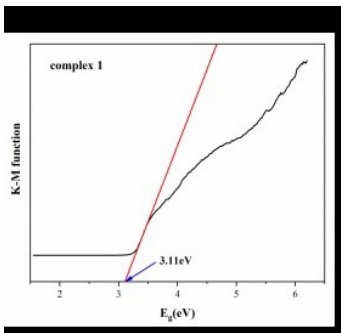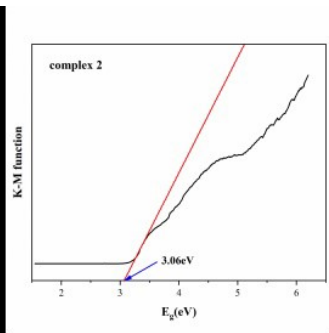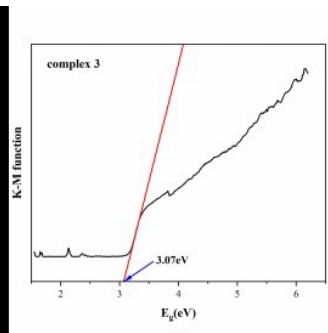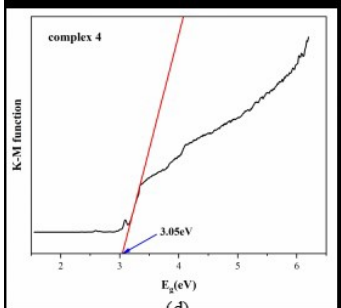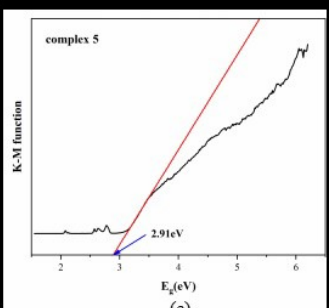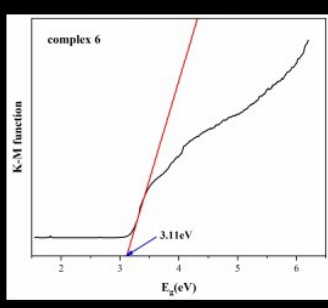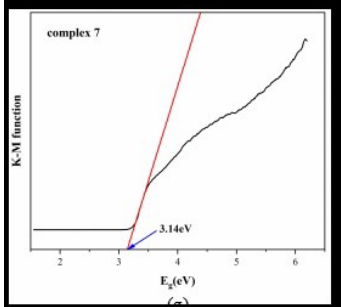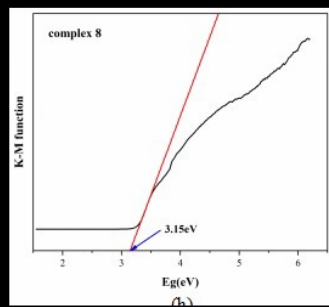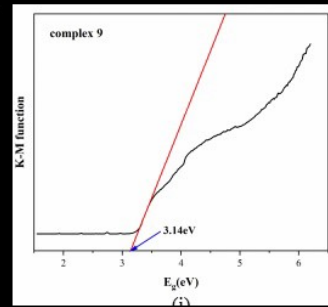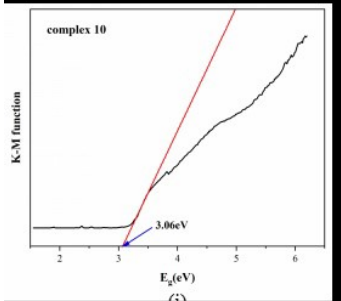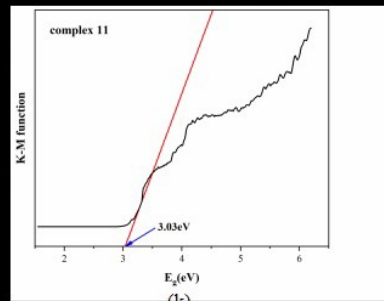

Supplement: d4ce00851k7.pdf [file d4ce00851k7.pdf]

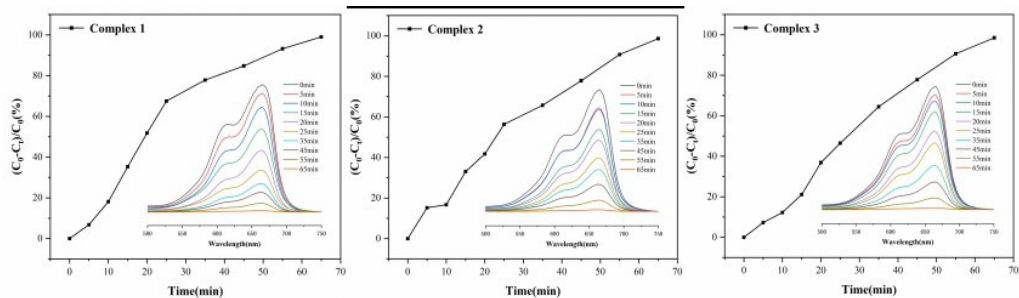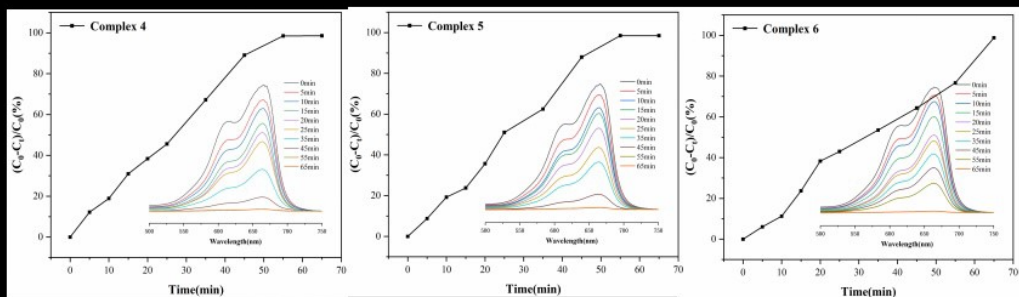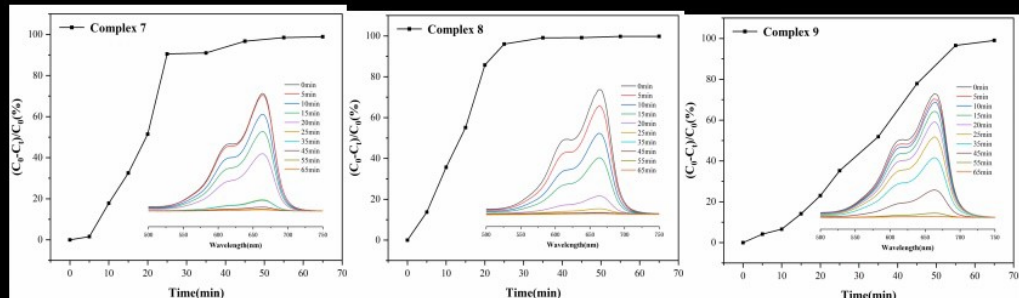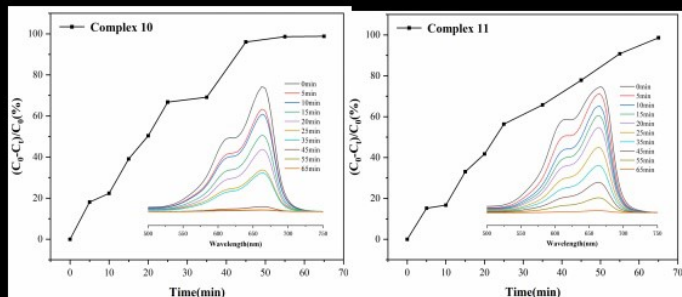

Supplement: d4ce00851k8.pdf [file d4ce00851k8.pdf]

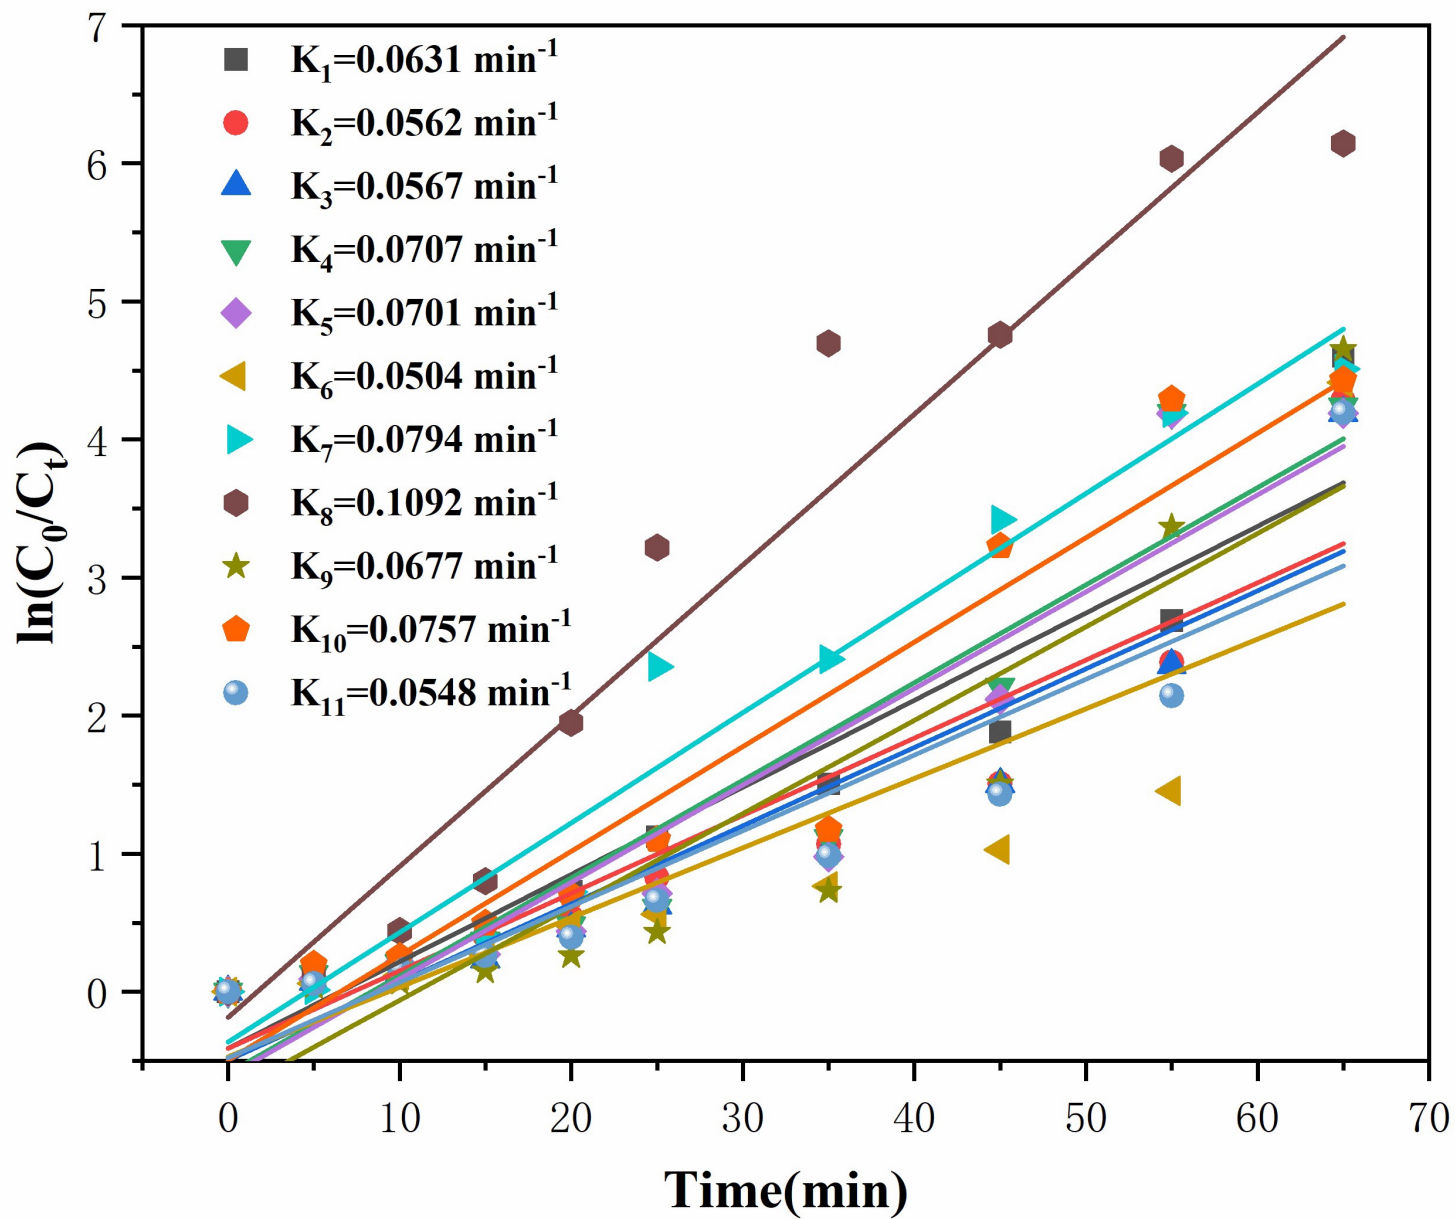

Supplement: d4ce00851k9.pdf [file d4ce00851k9.pdf]
